# Supplementary material for: A highly efficient one-pot method for the synthesis of thioureas and 2-imino-4-thiazolidinones under microwave conditions
Source: Royal Society of Chemistry journal article supplement (doi:10.1039/c3ra46270f), 2013-11-19

# Std Proton parameters

exp1 s2pul

| SAMPLE         |                | DEC. & VT  |         |
|----------------|----------------|------------|---------|
| date           | Nov 9 2011     | dfrq       | 100.528 |
| solvent        | CDC13          | dn         | C13     |
| file           | /export/home/~ | dpwr       | 46      |
| cmc/vnmr       | sys/data/2~    | dof        | 0       |
| 0111109_04.fid |                | dm         | nnn     |
| ACQUISITION    |                | dmm        | c       |
| sfrq           | 399.756        | dmf        | 18500   |
| tn             | H1             | PROCESSING |         |
| at             | 2.558          | lb         | 0.10    |
| np             | 22490          | wtfile     |         |
| sw             | 4395.6         | proc       | ft      |
| fb             | not used       | fn         | 65536   |
| bs             | 4              |            |         |
| tpwr           | 56             | werr       |         |
| pw             | 7.5            | wexp       | wft     |
| d1             | 1.000          | wbs        |         |
| tof            | -60.6          | wnt        |         |
| nt             | 32             |            |         |
| ct             | 24             |            |         |
| alock          | y              |            |         |
| gain           | not used       |            |         |
| FLAGS          |                |            |         |
| tl             | n              |            |         |
| tn             | n              |            |         |
| dp             | y              |            |         |
| DISPLAY        |                |            |         |
| sp             | -206.8         |            |         |
| wp             | 4395.5         |            |         |
| vs             | 295            |            |         |
| sc             | 0              |            |         |
| wc             | 240            |            |         |
| hzmm           | 18.31          |            |         |
| is             | 920.15         |            |         |
| rfl            | 3101.1         |            |         |
| rfp            | 2894.2         |            |         |
| th             | 2              |            |         |
| ins            | 100.000        |            |         |
| al             | cdc ph         |            |         |

7.240

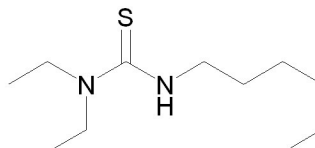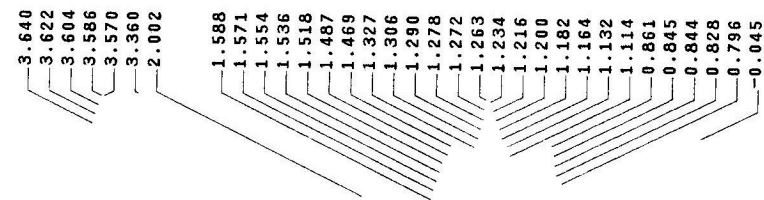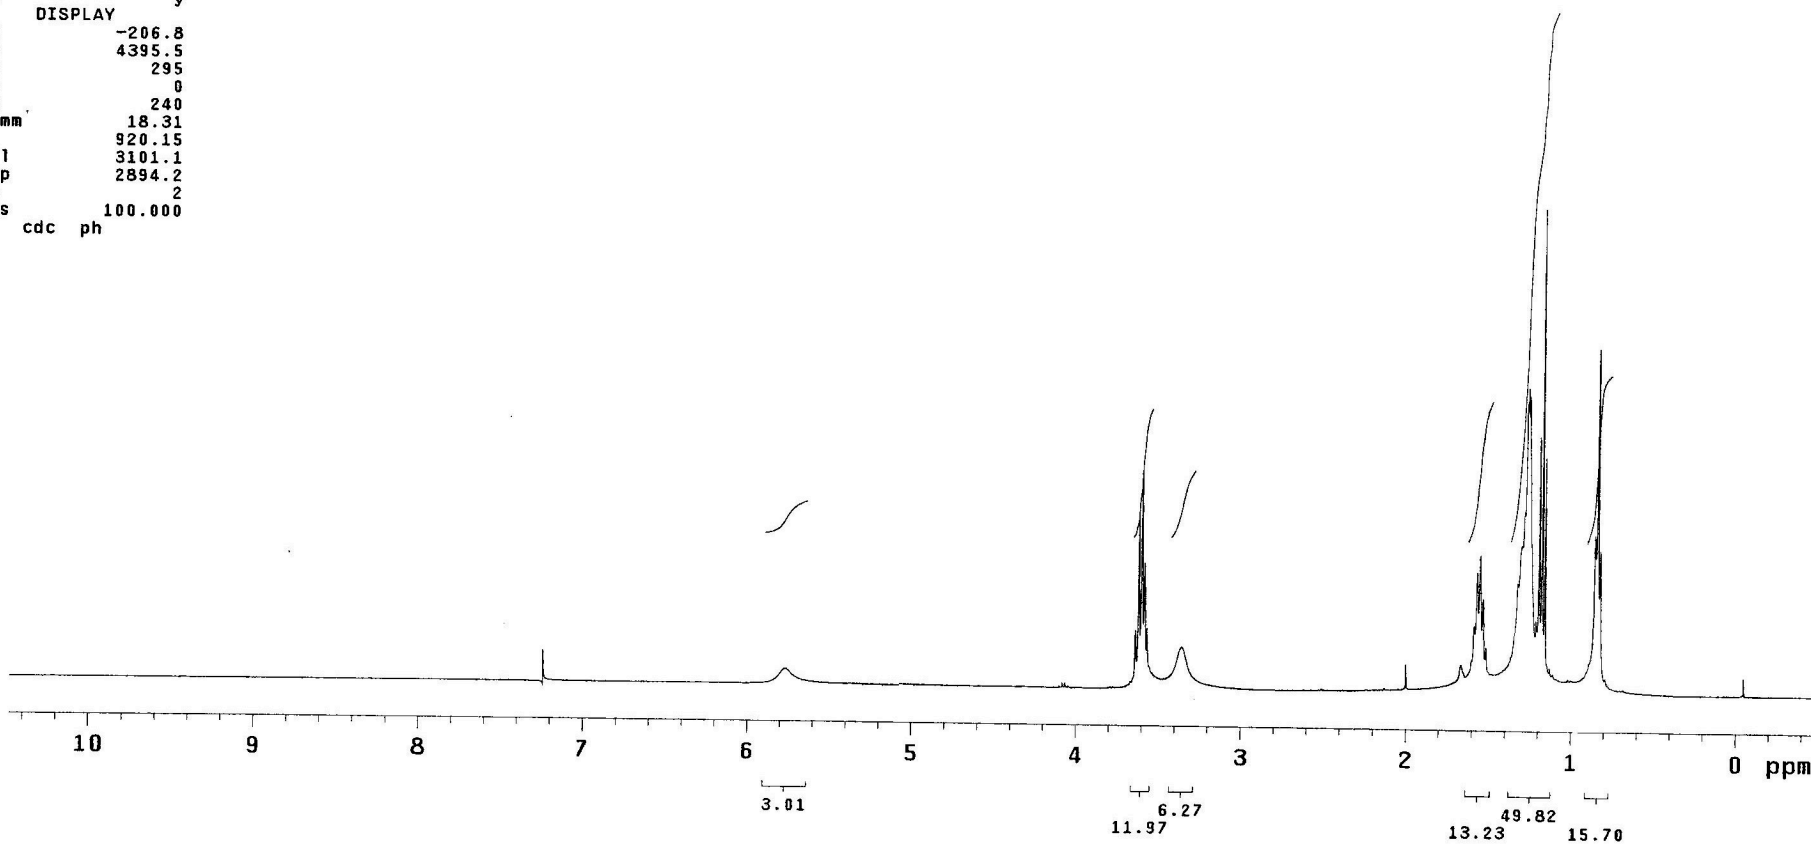

Std Carbon experiment

|                      |                |            |          |
|----------------------|----------------|------------|----------|
| exp1                 | Carbon         |            |          |
| SAMPLE               |                | SPECIAL    |          |
| date                 | Nov 16 2011    | temp       | not used |
| solvent              | CDCl3          | gain       | 20       |
| file                 | /export/home/~ | spin       | 20       |
| cmc/vnmr/sys/data/2~ | 0111116_02.fid | hst        | 0.008    |
|                      |                | pw90       | 15.900   |
| ACQUISITION          | alfa           |            | 10.000   |
| sw                   | 24096.4        | FLAGS      |          |
| at                   | 1.300          | il         | n        |
| np                   | 62674          | in         | n        |
| fb                   | 13200          | dp         | y        |
| bs                   | 16             | hs         | nn       |
| d1                   | 1.000          | PROCESSING |          |
| nt                   | 5000           | lb         | 1.00     |
| ct                   | 2192           | fn         | 65536    |
| TRANSMITTER          |                | DISPLAY    |          |
| tn                   | C13            | sp         | -1547.0  |
| sfrq                 | 100.529        | wp         | 24095.7  |
| tof                  | 1027.4         | rfl        | 9287.6   |
| tpwr                 | 56             | rfp        | 7739.9   |
| pw                   | 7.950          | rp         | 83.3     |
| DECOUPLER            |                | lp         | -235.5   |
| dn                   | H1             | PLOT       |          |
| dof                  | 0              | wc         | 250      |
| dm                   | yyy            | sc         | 0        |
| dmm                  | w              | vs         | 240      |
| dpwr                 | 39             | th         | 7        |
| dmf                  | 9500           | ai         | cdc ph   |

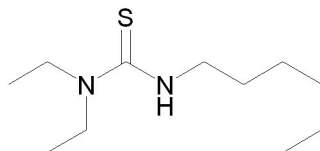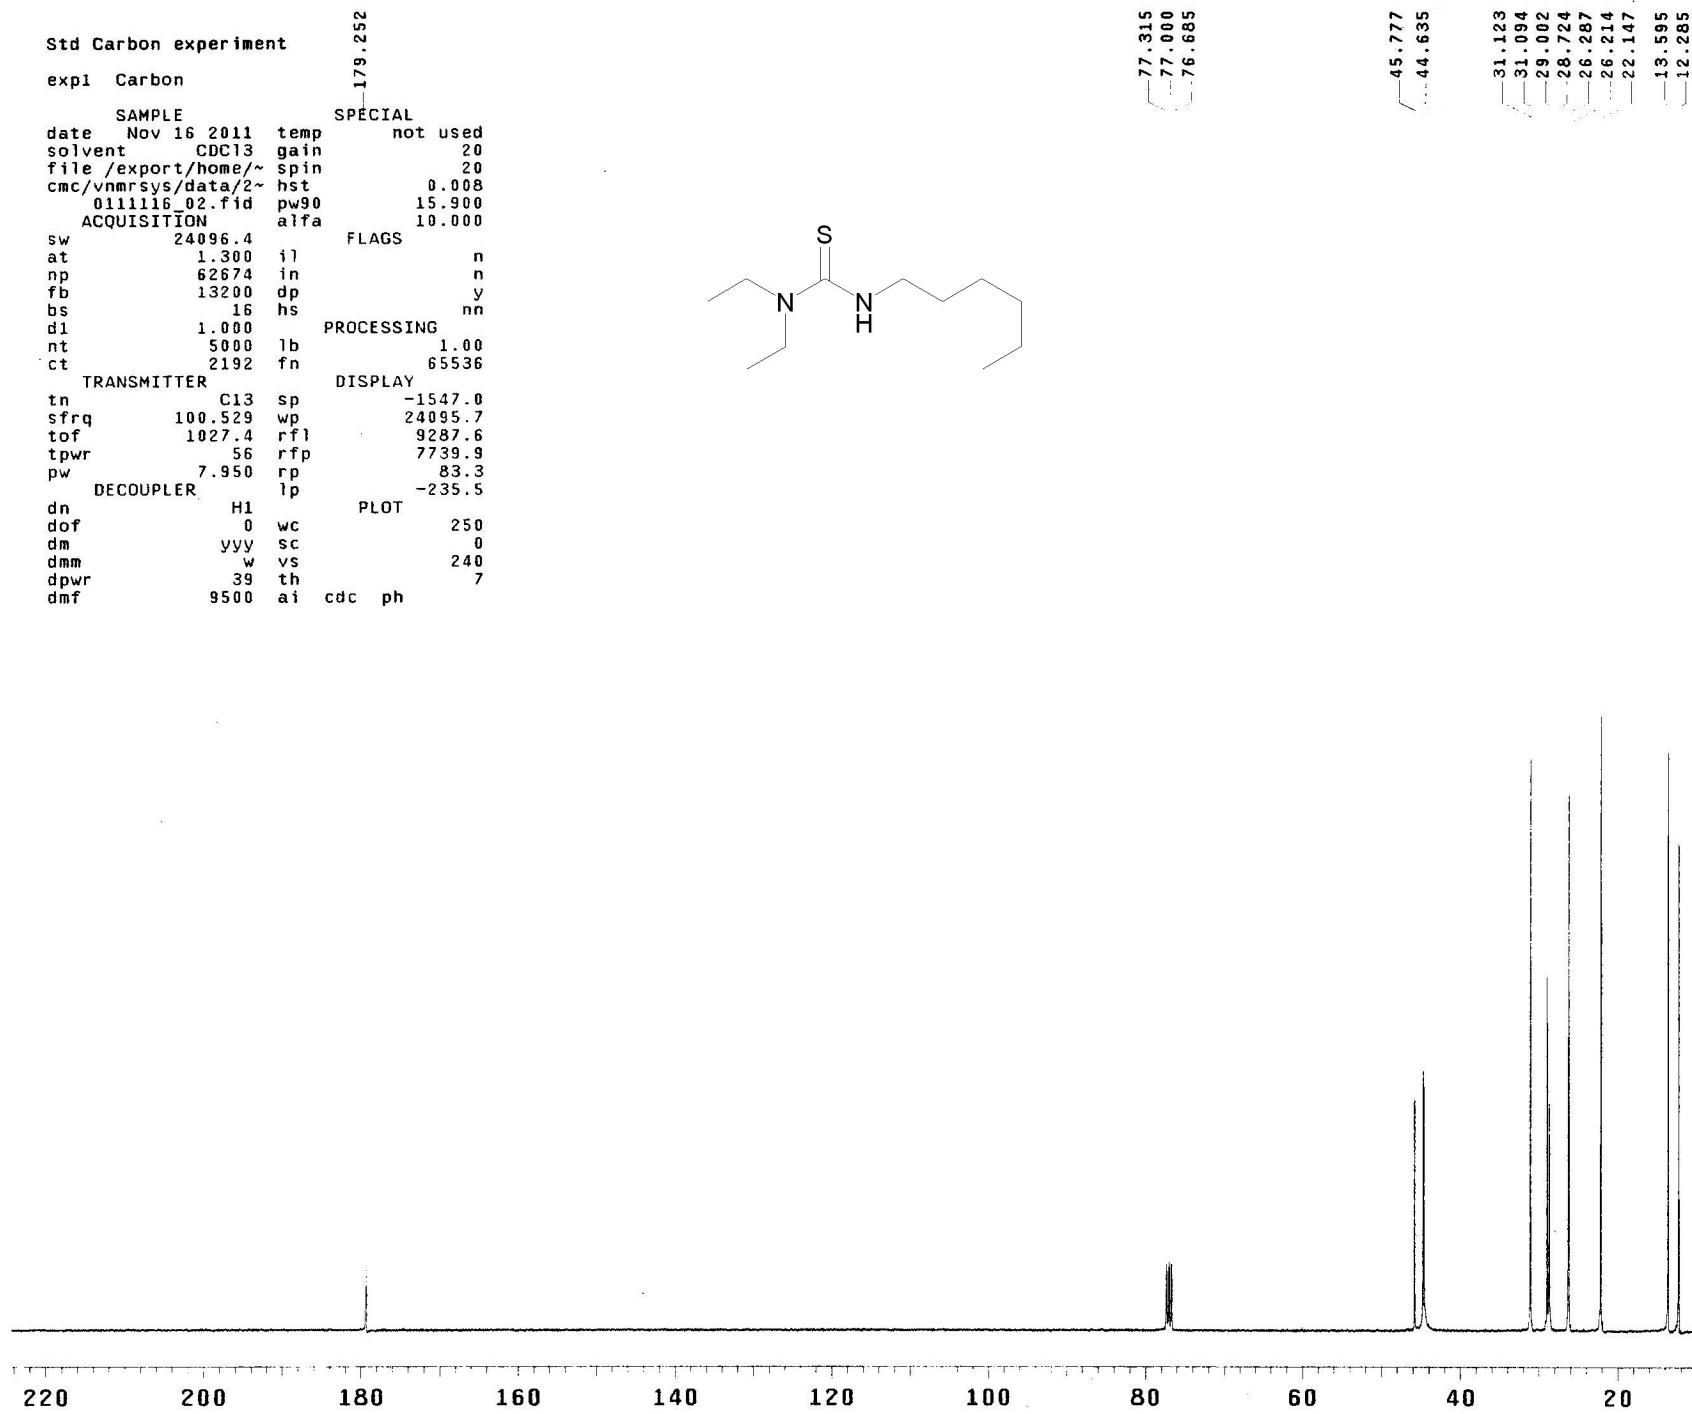

# Std Proton parameters

exp1 s2pul

| SAMPLE         |                | DEC. & VT  |         |
|----------------|----------------|------------|---------|
| date           | Nov 9 2011     | dfrq       | 100.528 |
| solvent        | CDC13          | dn         | C13     |
| file           | /export/home/~ | dpwr       | 46      |
| cmc/vnmr       | sys/data/2~    | dof        | 0       |
| 0111109_05.fid |                | dm         | nnn     |
| ACQUISITION    |                |            |         |
| sfrq           | 399.756        | dmm        | c       |
| tn             | H1             | dmf        | 18500   |
| at             | 2.558          | PROCESSING |         |
| np             | 22490          | lb         | 0.10    |
| sw             | 4395.6         | wtfile     |         |
| fb             | not used       | proc       | ft      |
| bs             | 4              | fn         | 65536   |
| tpwr           | 56             | werr       |         |
| pw             | 7.5            | wexp       | wft     |
| d1             | 1.000          | wbs        |         |
| tof            | -60.6          | wnt        |         |
| nt             | 32             |            |         |
| ct             | 20             |            |         |
| alock          | y              |            |         |
| gain           | not used       |            |         |
| FLAGS          |                |            |         |
| il             | n              |            |         |
| in             | n              |            |         |
| dp             | y              |            |         |
| DISPLAY        |                |            |         |
| sp             | -194.9         |            |         |
| wp             | 4395.5         |            |         |
| vs             | 170            |            |         |
| sc             | 0              |            |         |
| wc             | 240            |            |         |
| hzmm           | 18.31          |            |         |
| is             | 559.76         |            |         |
| rfl            | 195.0          |            |         |
| rfp            | 0              |            |         |
| th             | 3              |            |         |
| ins            | 100.000        |            |         |
| ai             | cdc ph         |            |         |

7.371  
7.352  
7.336  
7.312  
7.293  
7.268  
7.245  
7.227

5.518

4.870  
4.857

3.692  
3.674  
3.656  
3.639

1.290  
1.239  
1.221  
1.203

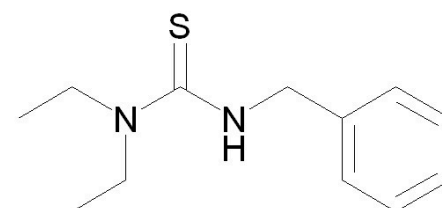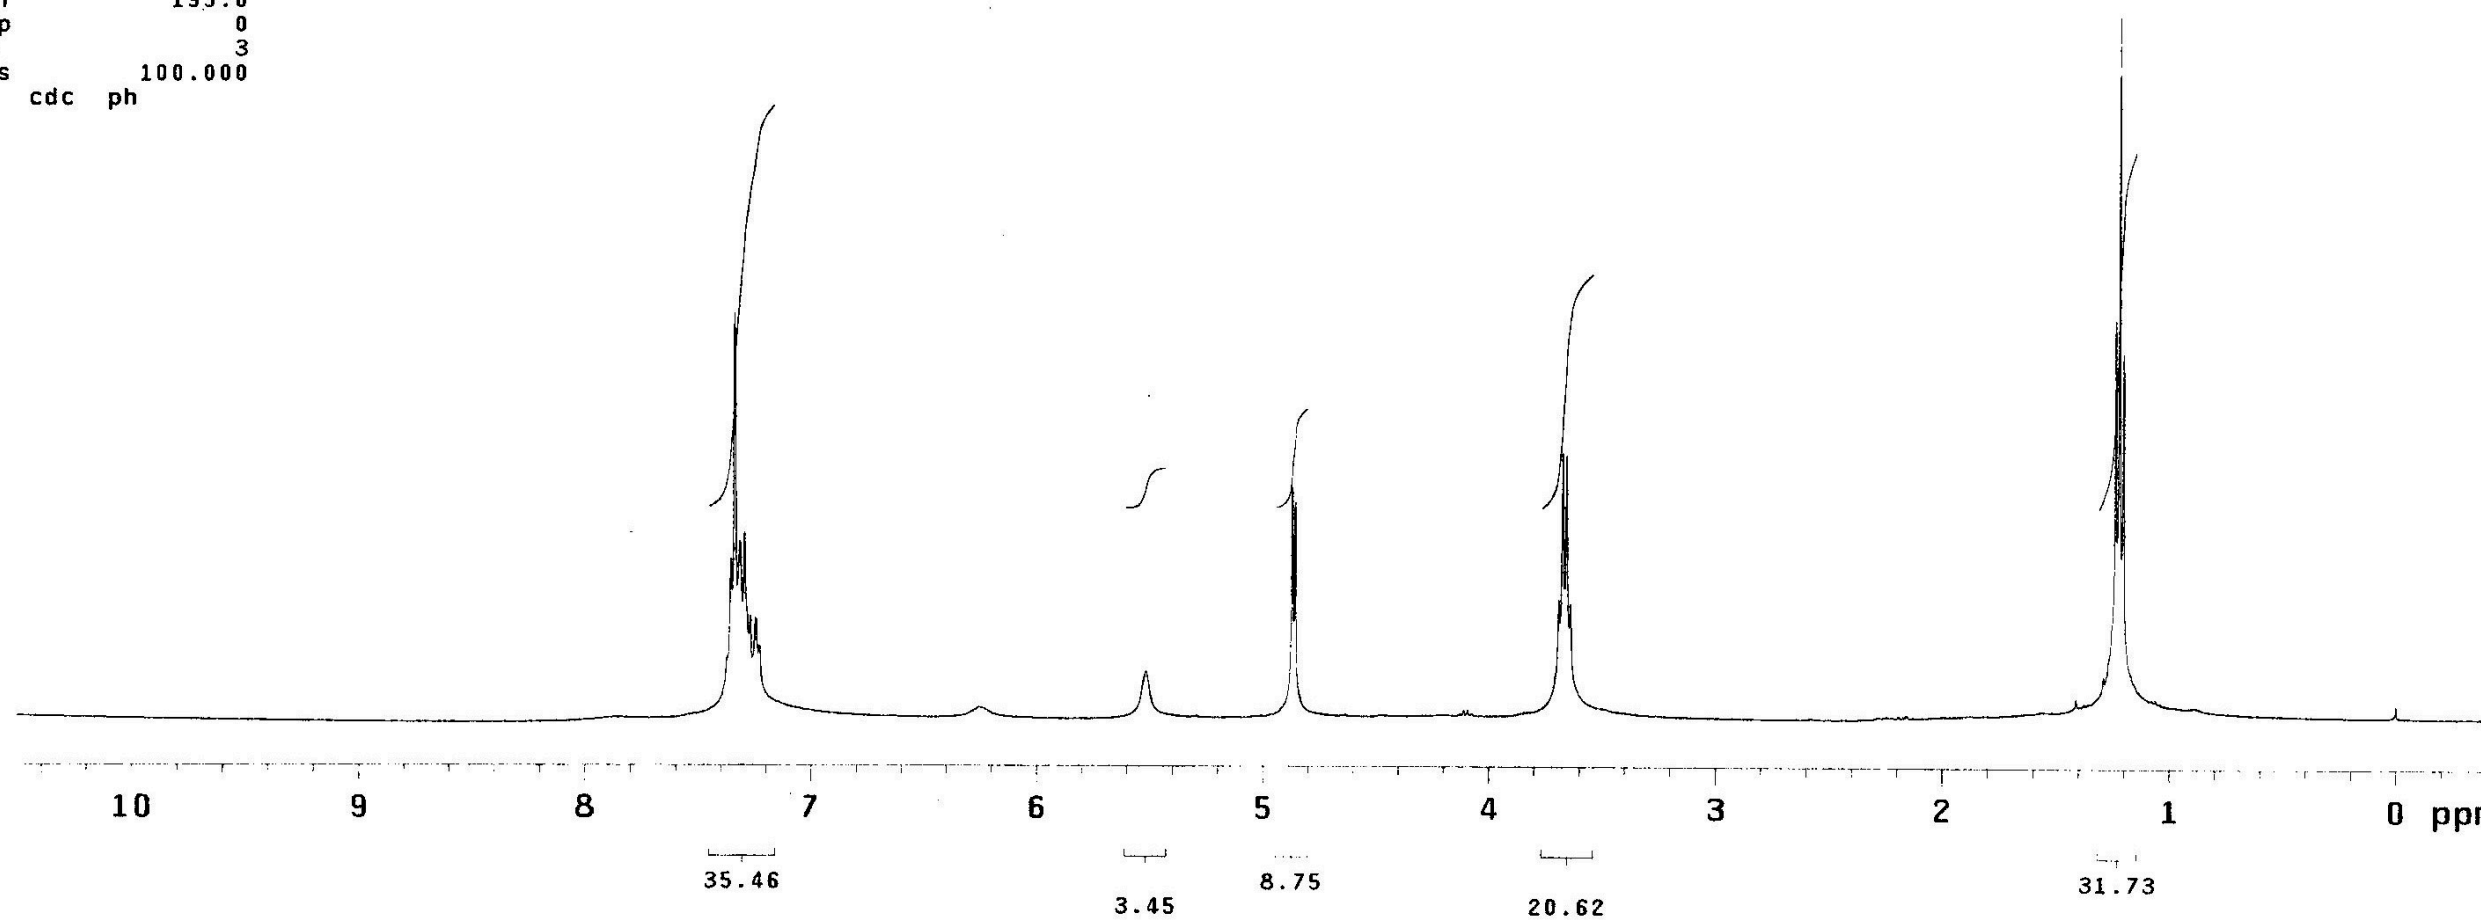

```
Std Carbon experiment
exp1 Carbon
SAMPLE
date Nov 10 2011 temp not used
solvent CDC13 gain 20
file /export/home/~ spin 20
cmc/vnmrsys/data/2~ hst 0.008
0111111_01.fid pw90 15.900
ACQUISITION alfa 10.000
sw 24096.4
at 1.300 il
np 62674 in
fb 13200 dp
bs 16 hs
dl 1.000
nt 10000 lb
ct 10000 fn
TRANSMITTER C13 sp
sfrq 100.529 wp
tof 1027.4 rfl
tpwr 56 rfp
pw 7.950 rp
DECOUPLER H1 lp
dn 0
dof 0 wc
dm yyY sc
dmm w vs
dpwr 39 th
dmf 9500 ai cdc ph
```

SPECIAL  
179.910

138.064  
128.488  
128.451  
127.537  
127.354  
127.296

77.322  
77.000  
76.685

49.807  
44.972

12.497

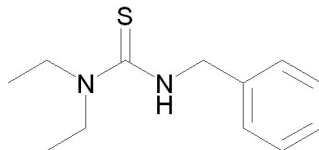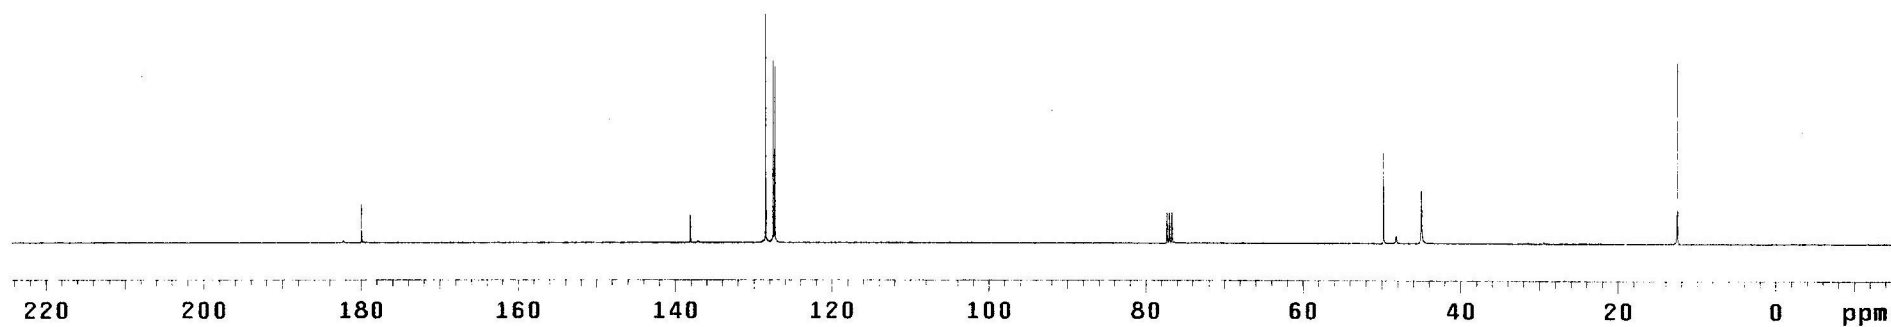

Std Proton parameters  
exp1 s2pul

| SAMPLE              |                | DEC. & VT  |         |
|---------------------|----------------|------------|---------|
| date                | Nov 10 2011    | dfrq       | 100.528 |
| solvent             | CDC13          | dn         | C13     |
| file                | /export/home/~ | dpwr       | 46      |
| cmc/vnmrsys/data/2~ |                | dof        | 0       |
| 0111110_07.fid      |                | dm         | nnn     |
| ACQUISITION         |                | dmm        | c       |
| sfrq                | 399.756        | dmf        | 18500   |
| tn                  | H1             | PROCESSING |         |
| at                  | 2.557          | lb         | 0.10    |
| np                  | 22480          | wtfile     |         |
| sw                  | 4395.6         | proc       | ft      |
| fb                  | not used       | fn         | 65536   |
| bs                  | 4              |            |         |
| tpwr                | 56             | werr       |         |
| pw                  | 7.5            | wexp       | wft     |
| d1                  | 1.000          | wbs        |         |
| tof                 | -60.6          | wnt        |         |
| nt                  | 16             |            |         |
| ct                  | 16             |            |         |
| alock               | y              |            |         |
| gain                | not used       |            |         |
| FLAGS               |                |            |         |
| il                  | n              |            |         |
| in                  | n              |            |         |
| dp                  | y              |            |         |
| DISPLAY             |                |            |         |
| sp                  | -206.5         |            |         |
| wp                  | 4395.5         |            |         |
| vs                  | 171            |            |         |
| sc                  | 0              |            |         |
| wc                  | 240            |            |         |
| hzmm                | 18.31          |            |         |
| is                  | 981.65         |            |         |
| rfl                 | 3100.9         |            |         |
| rfp                 | 2894.2         |            |         |
| th                  | 7              |            |         |
| ins                 | 100.000        |            |         |
| ai                  | cdc            | ph         |         |

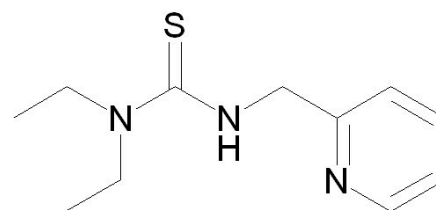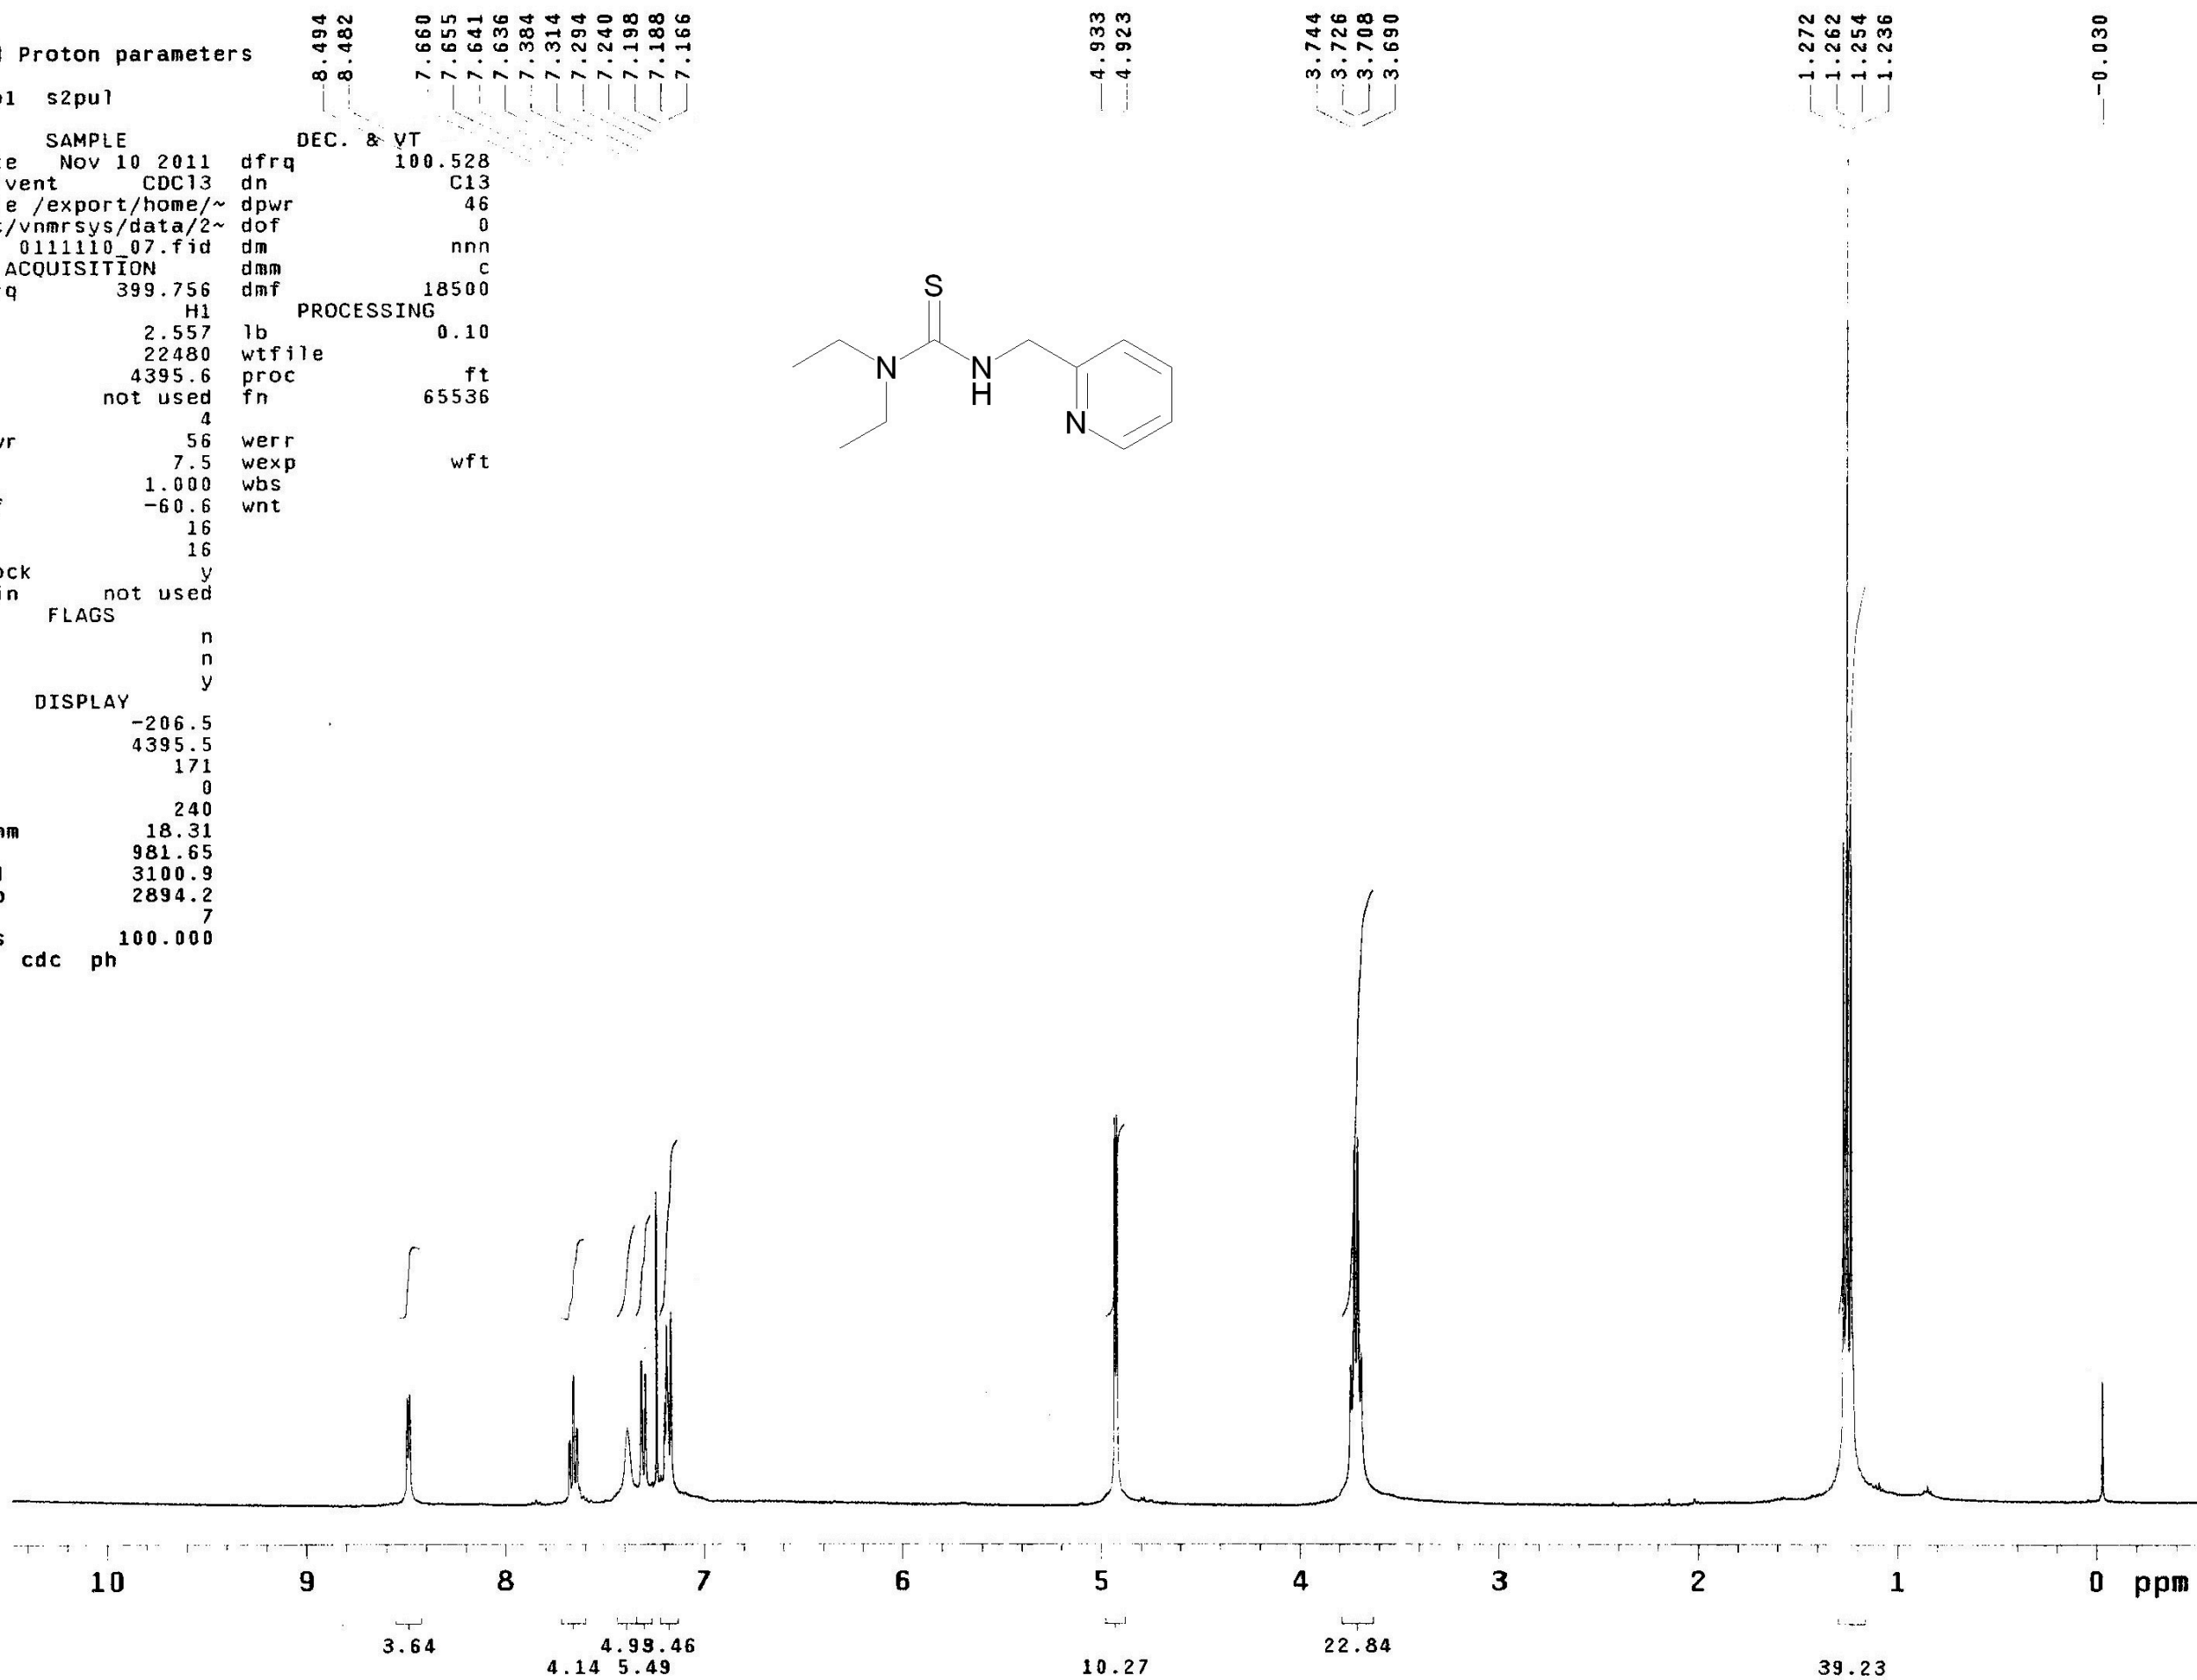

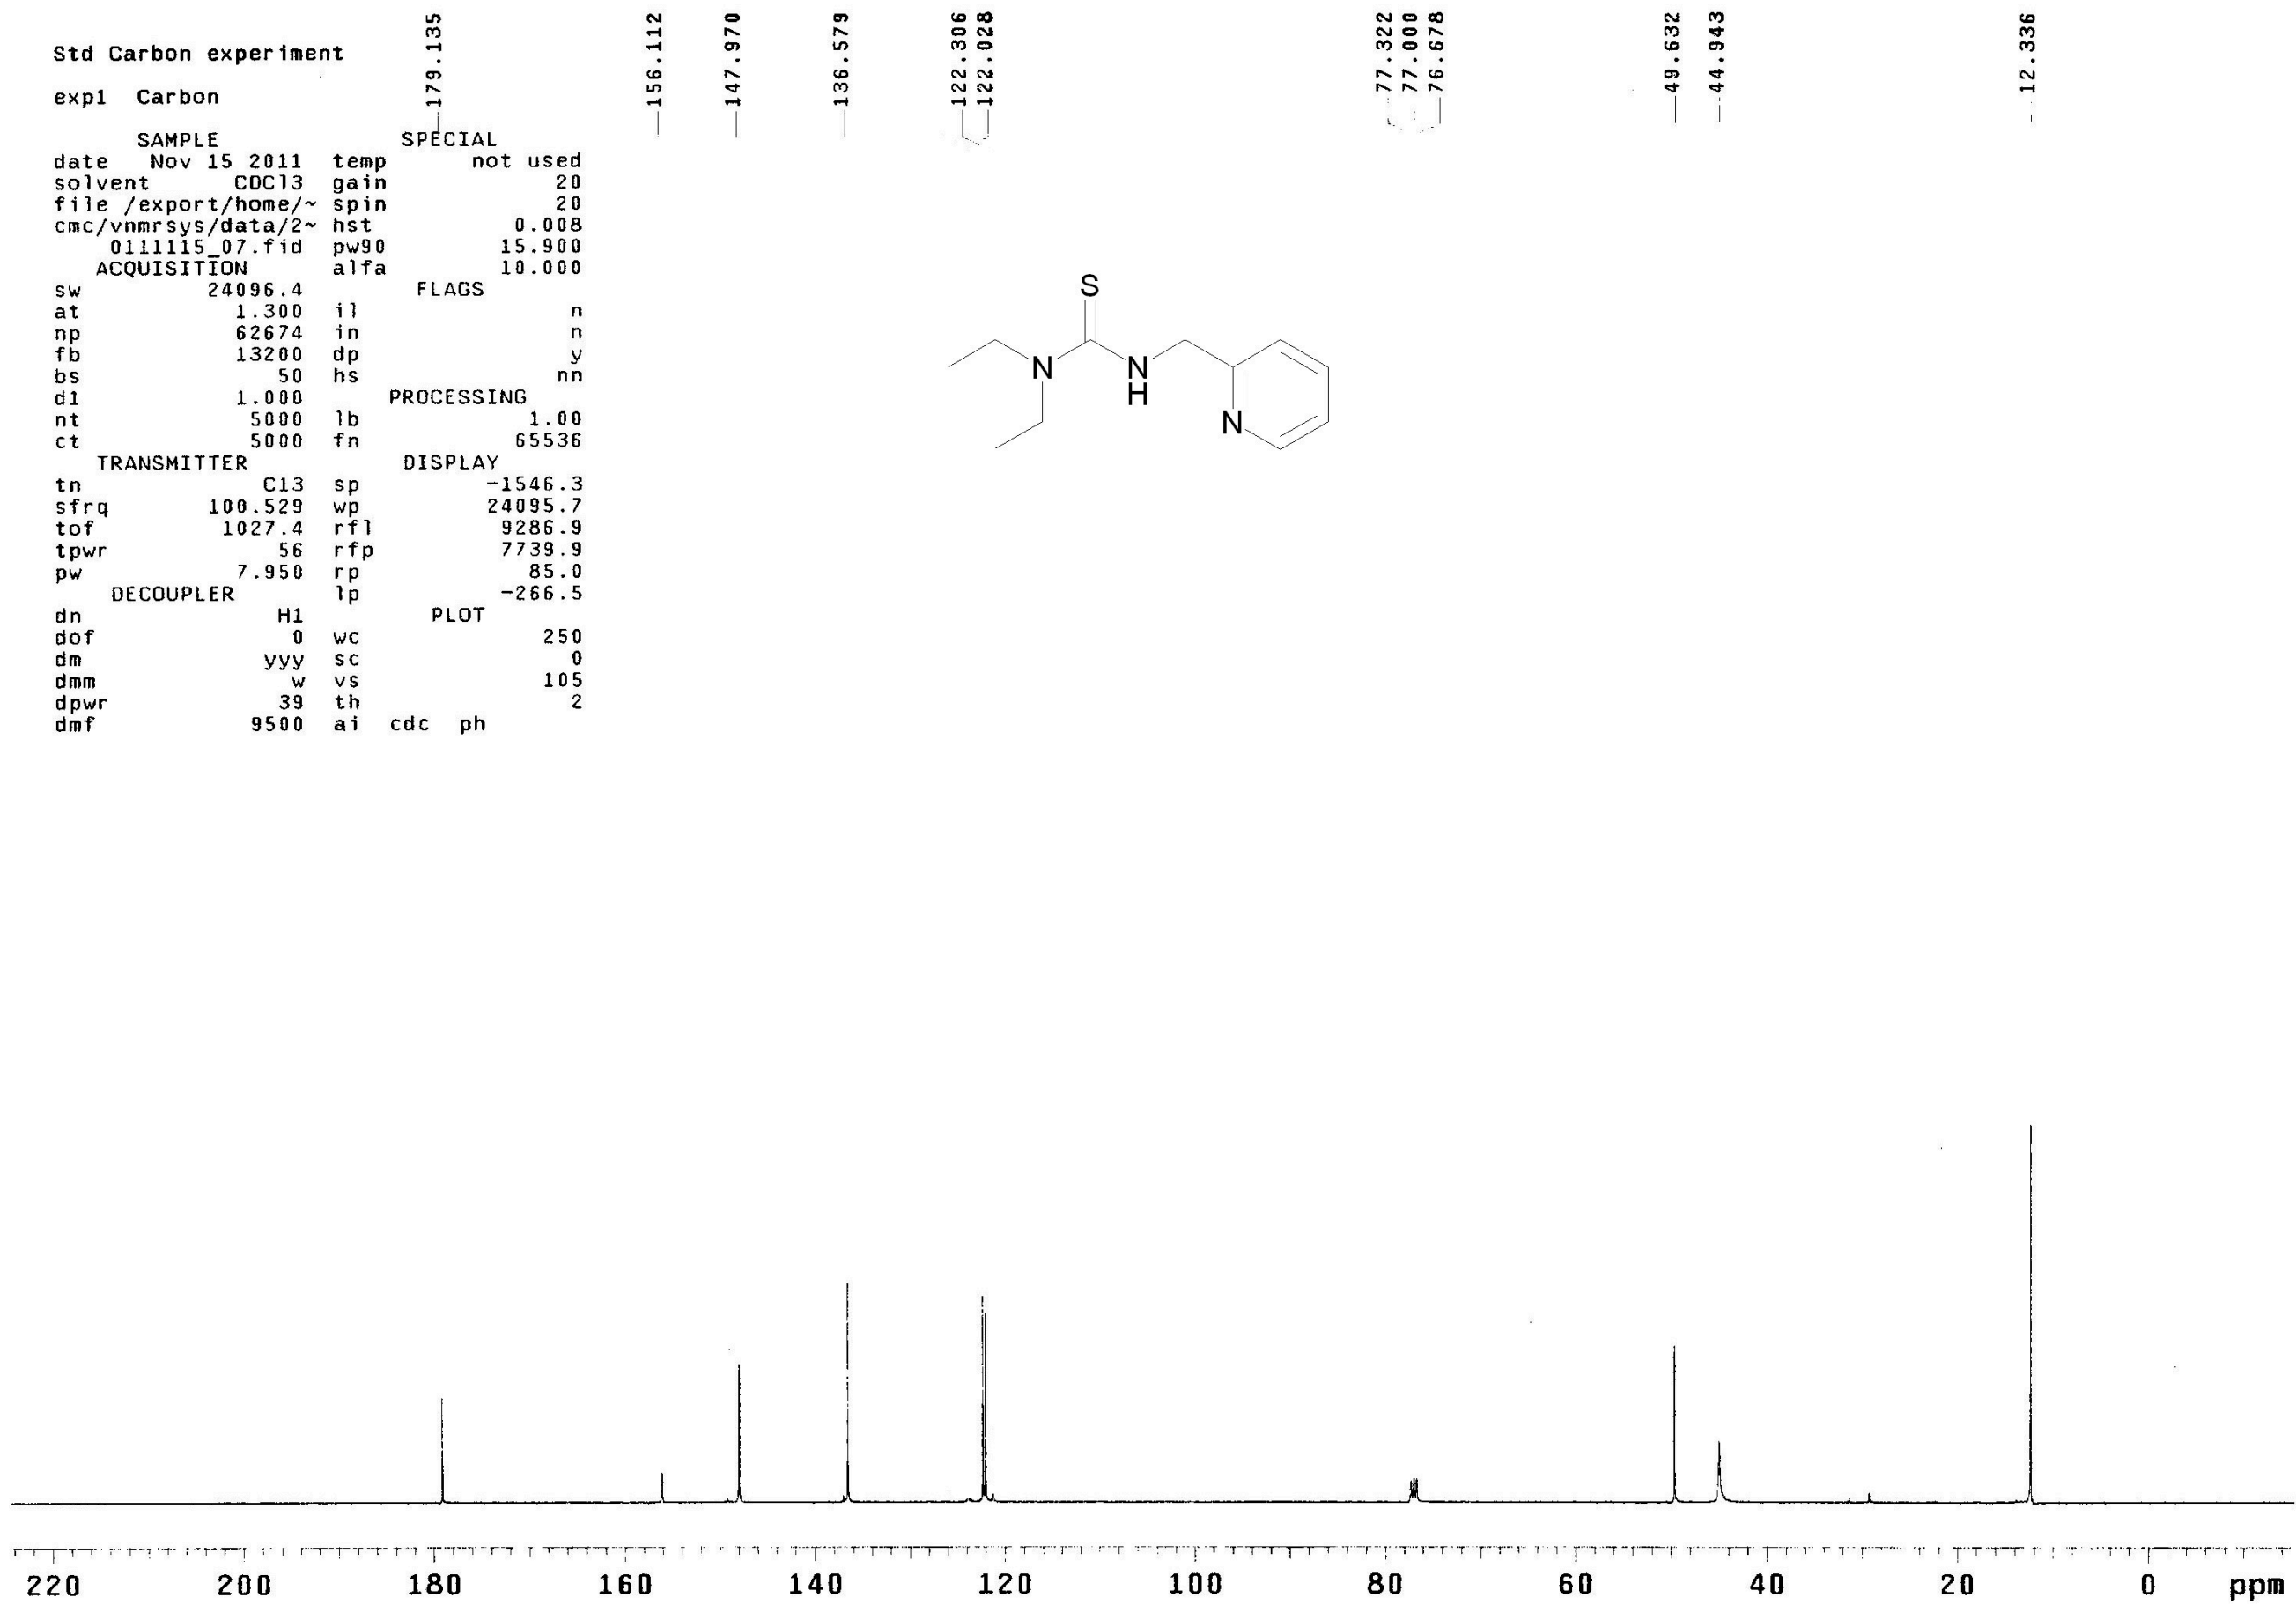

# Std Proton parameters

exp1 s2pul

```

SAMPLE
date Nov 12 2011 dfrq 100.528
solvent CDCl3 dn C13
file /export/home/~ dpwr 46
cmc/vnmr/sys/data/2~ dof 0
0111112_05.fid dm nnn
ACQUISITION dmm c
sfrq 399.756 dmf 18500
tn H1
at 2.557 lb 0.10
np 22480 wtfile
sw 4395.6 proc ft
fb not used fn 65536
bs 4
tpwr 56 werr
pw 7.5 wexp wft
d1 1.000 wbs
tof -60.6 wnt
nt 16
ct 16
alock y
gain not used
FLAGS
il n
in n
dp y
DISPLAY
sp -206.2
wp 4395.5
vs 150
sc 0
wc 240
hzmm 18.31
is 461.08
rfl 3100.6
rfp 2894.2
th 8
ins 100.000
ai cdc ph

```

7.367  
7.351  
7.330  
7.320  
7.314  
7.308  
7.303  
7.286  
7.241  
7.240  
7.200  
7.183  
6.977

3.779  
3.761  
3.743  
3.725

1.309  
1.291  
1.273  
1.252  
1.234  
1.216

-0.024

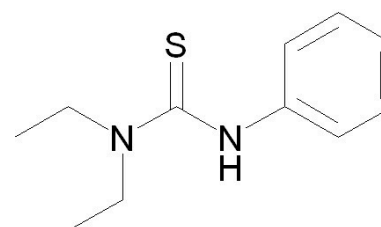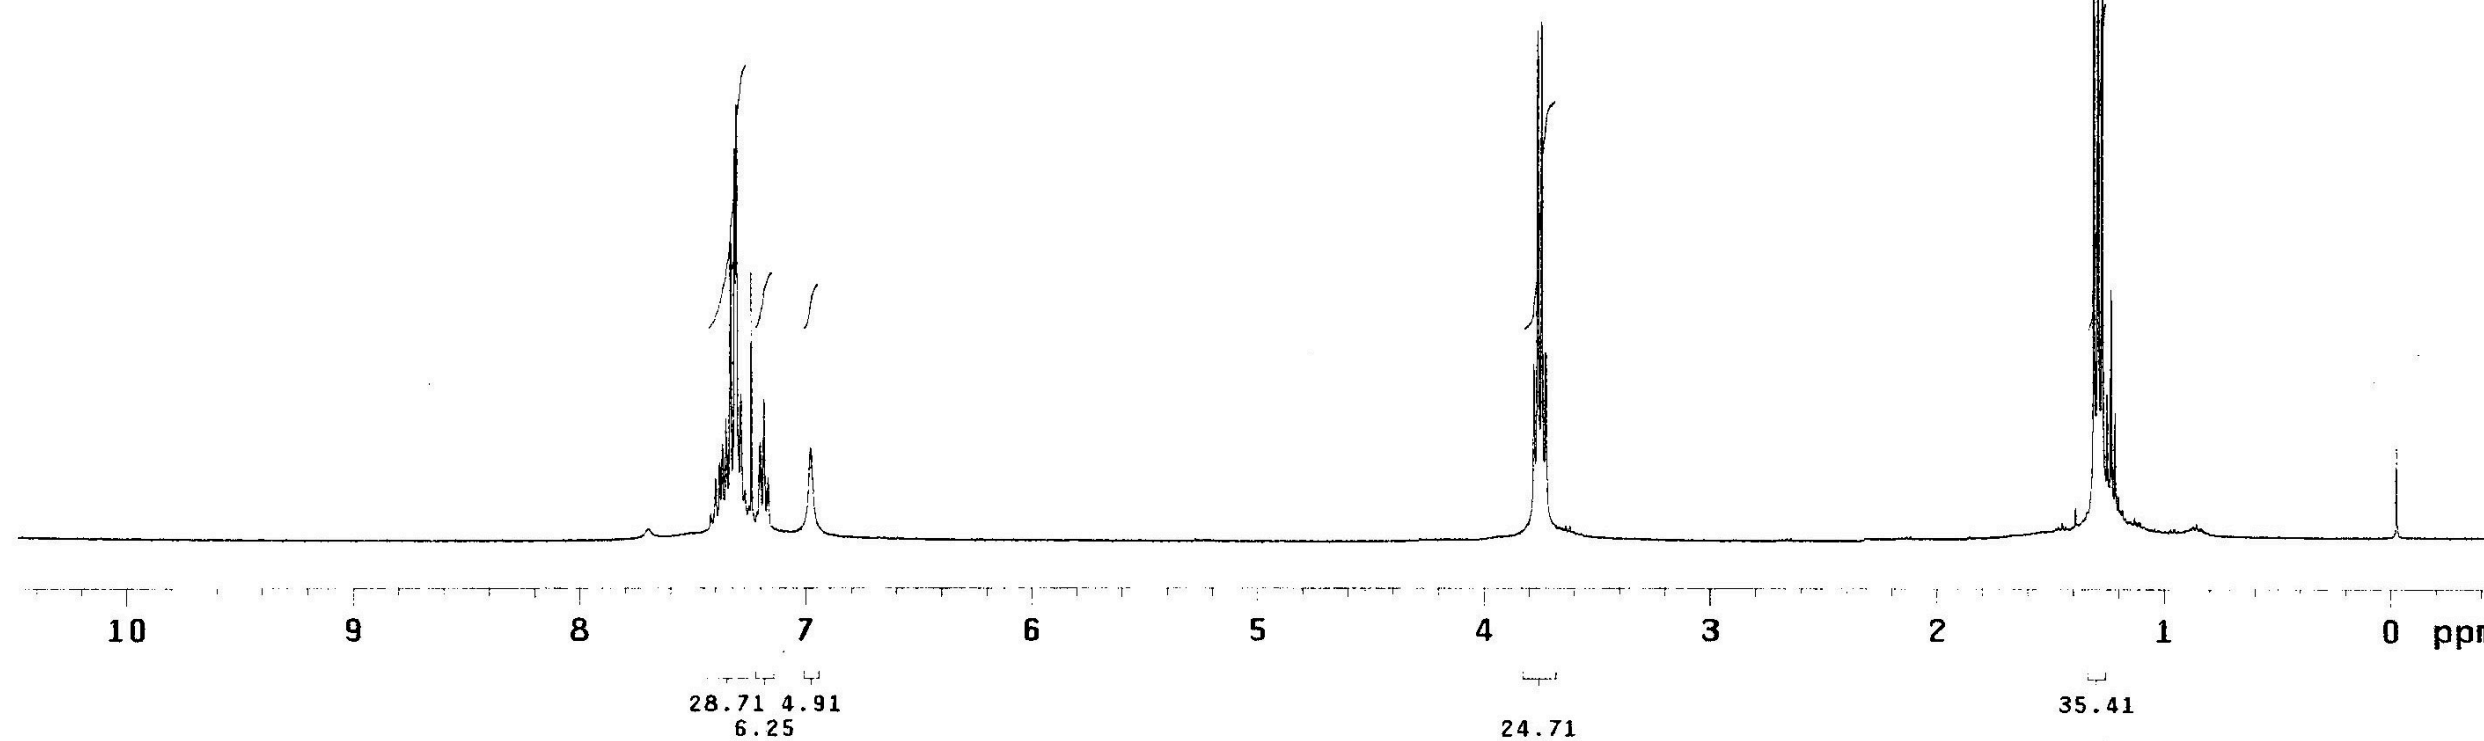

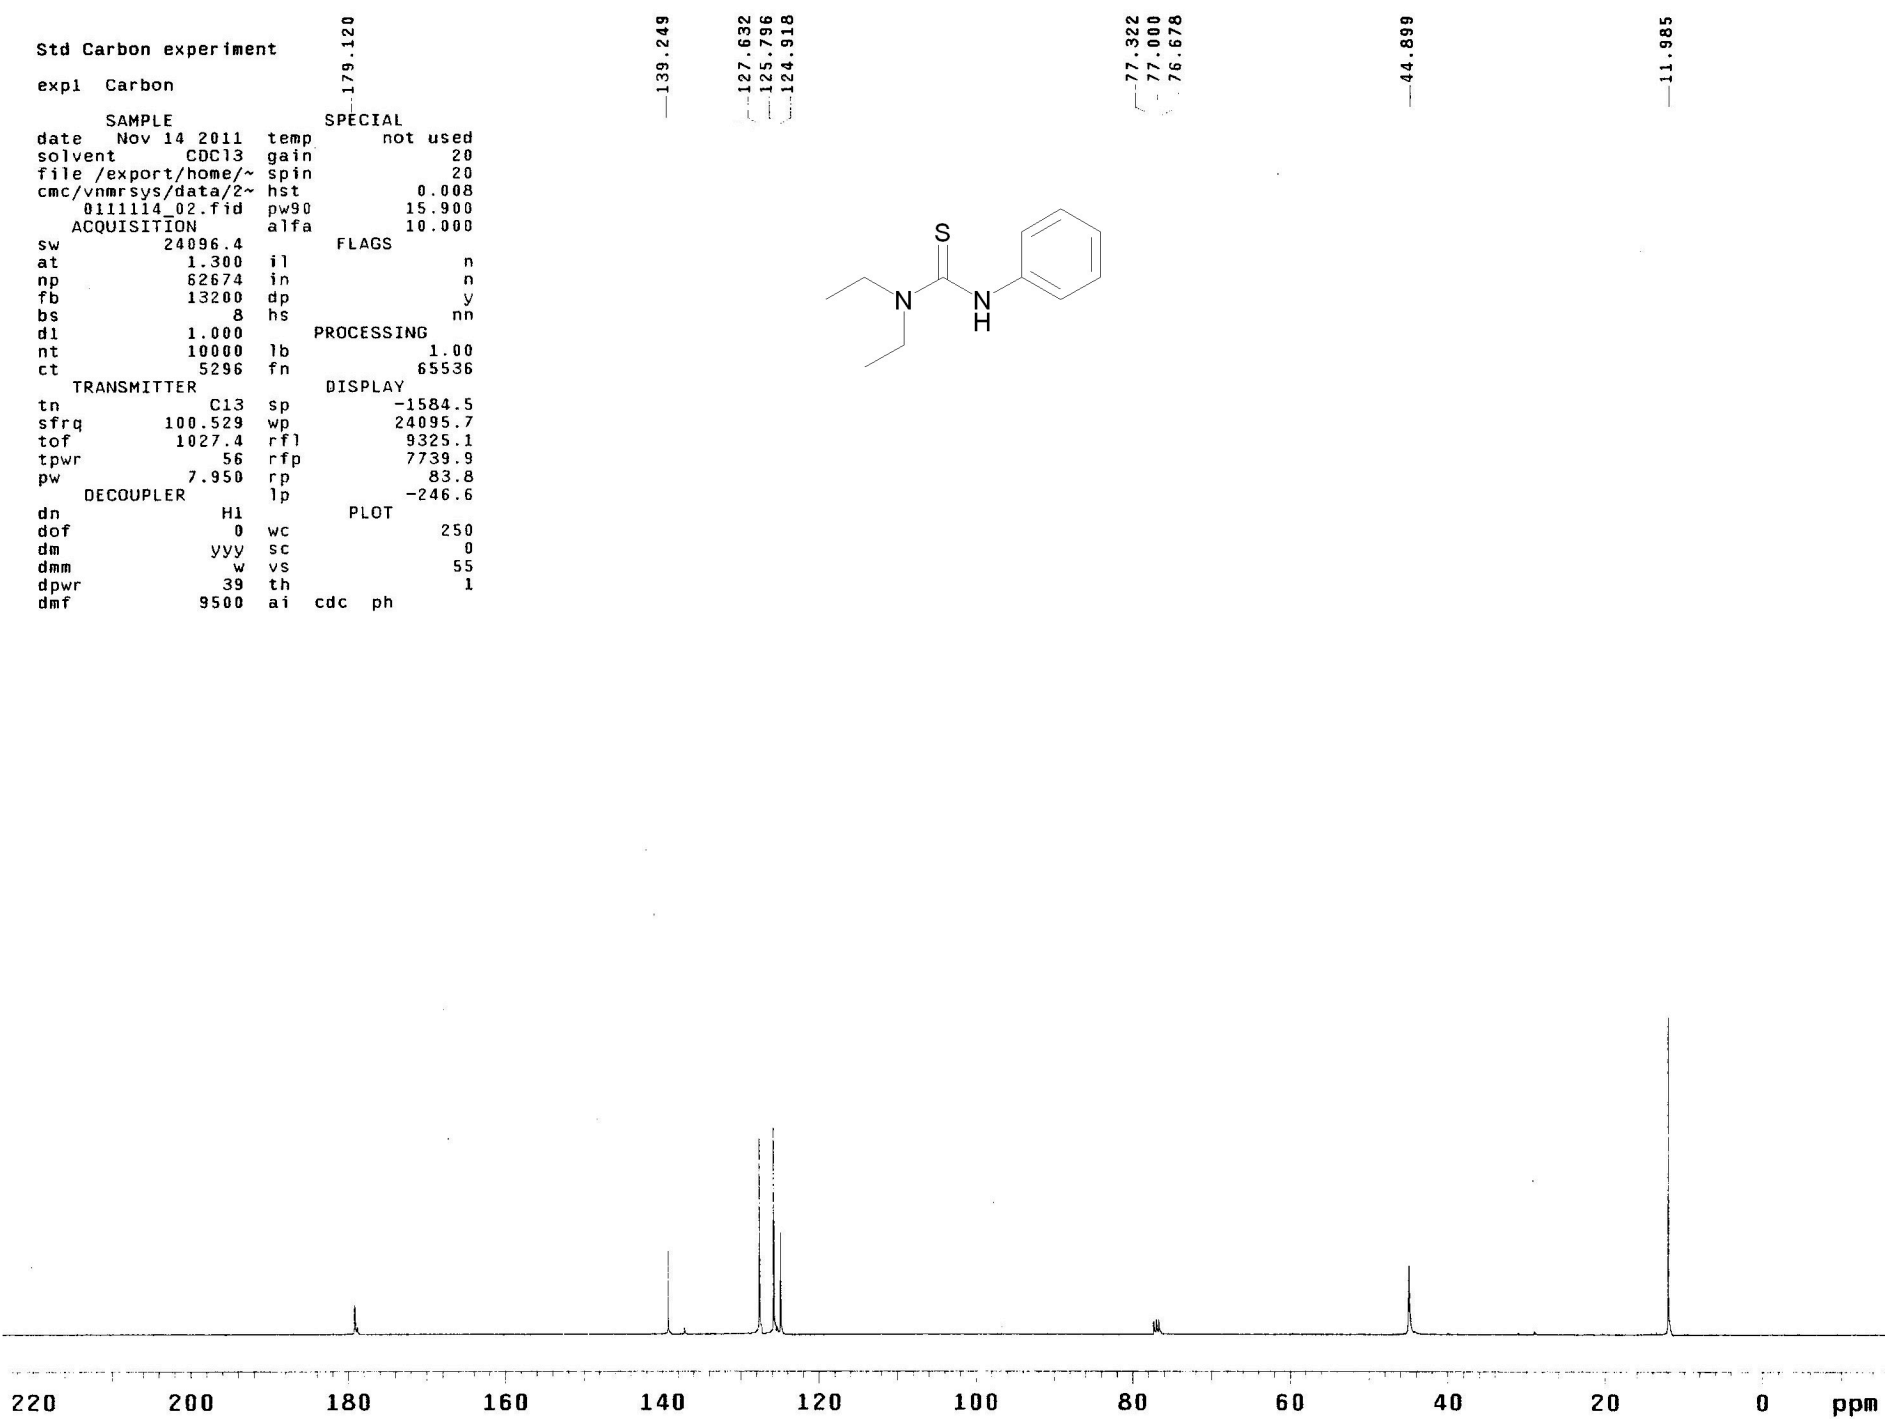

# 1D Proton parameters

exp1 Proton

| SAMPLE      |             | DEC. & VT  |         |
|-------------|-------------|------------|---------|
| date        | Mar 30 2012 | dfrq       | 100.528 |
| solvent     | CDCl3       | dn         | C13     |
| file        | exp         | dpwr       | 46      |
| ACQUISITION |             | dof        | 0       |
| sfrq        | 399.756     | dm         | nnn     |
| tn          | H1          | dmm        | c       |
| at          | 2.557       | dmf        | 18500   |
| np          | 22480       | PROCESSING |         |
| sw          | 4395.6      | lb         | 0.10    |
| fb          | not used    | wtfile     |         |
| bs          | 4           | proc       | ft      |
| tpwr        | 56          | fn         | 65536   |
| pw          | 7.5         |            |         |
| d1          | 1.000       | werr       |         |
| tof         | -60.6       | wexp       | wft     |
| nt          | 32          | wbs        |         |
| ct          | 16          | wnt        |         |
| alock       | y           |            |         |
| gain        | not used    |            |         |
| FLAGS       |             |            |         |
| il          | n           |            |         |
| in          | n           |            |         |
| dp          | y           |            |         |
| DISPLAY     |             |            |         |
| sp          | -207.3      |            |         |
| wp          | 4395.5      |            |         |
| vs          | 28          |            |         |
| sc          | 0           |            |         |
| wc          | 240         |            |         |
| hzmm        | 18.31       |            |         |
| is          | 1277.34     |            |         |
| rfl         | 3101.7      |            |         |
| rfp         | 2894.2      |            |         |
| th          | 6           |            |         |
| ins         | 100.000     |            |         |
| nm          | cdc ph      |            |         |

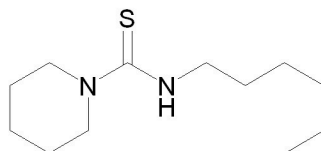

7.240

3.751  
3.737  
3.726  
3.630  
3.625  
3.613  
3.609

1.620  
1.608  
1.594  
1.580  
1.564  
1.318  
1.290  
0.874  
0.860  
0.857  
0.842

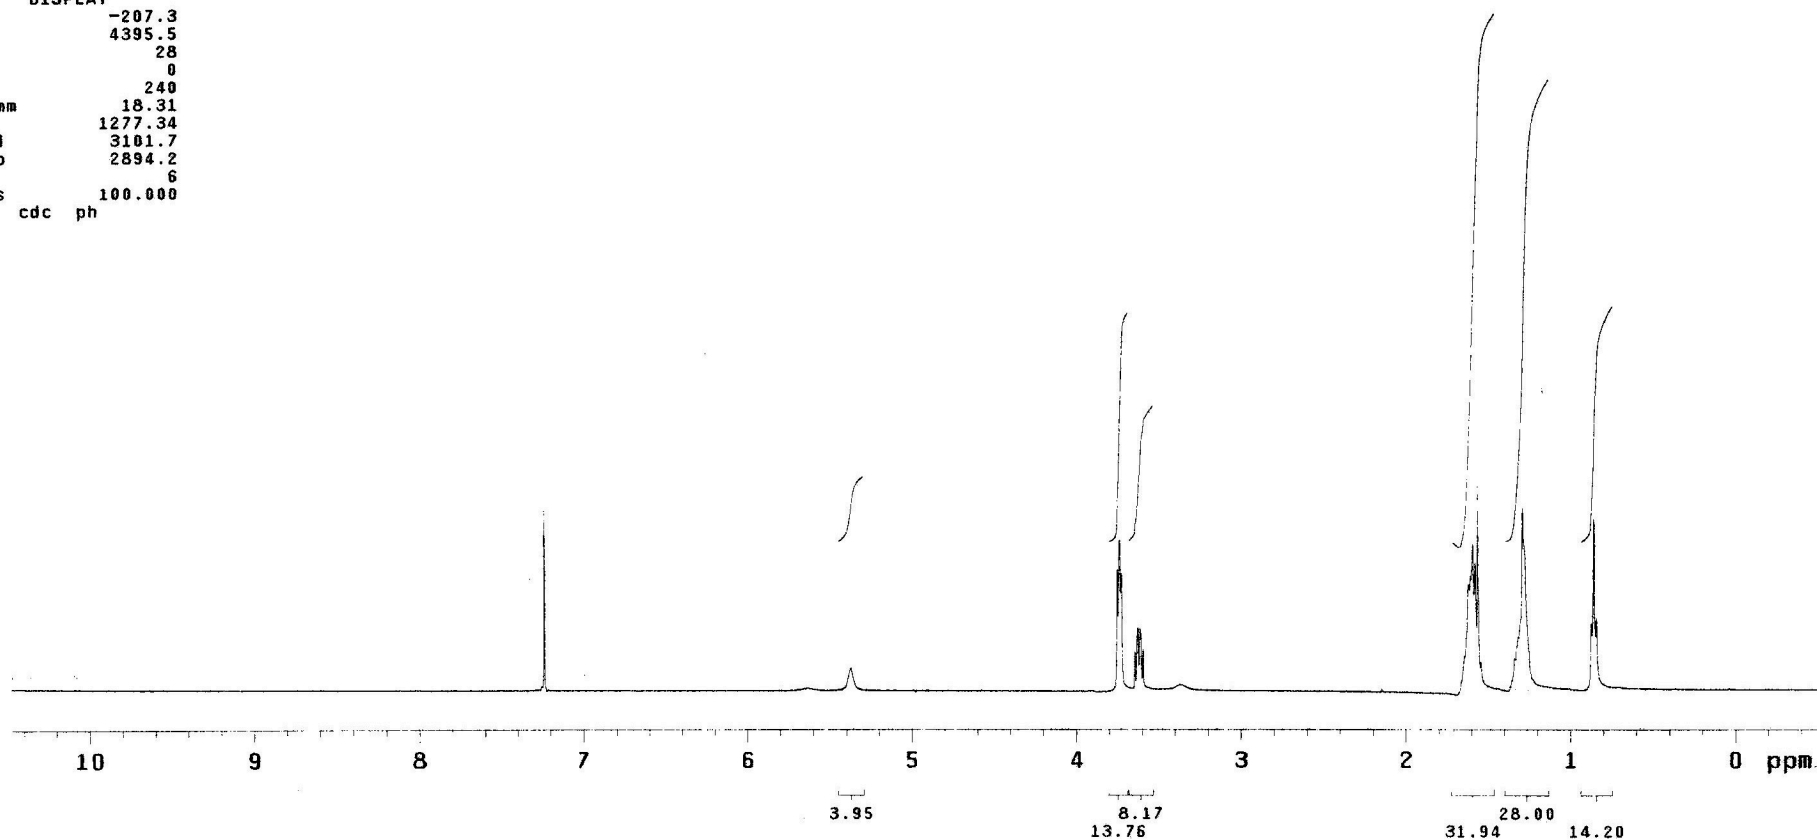

Std Carbon experiment  
exp1 Carbon

SAMPLE  
date Oct 20 2011 temp not used  
solvent CDCl3 gain 18  
file /export/home/~ spin 20  
cmc/vnmrsys/data/2~ hst 0.008  
0111021\_01.fid pw90 15.900  
ACQUISITION alfa 10.000

sw 24096.4  
at 1.300 il  
np 62674 in  
fb 13200 dp  
bs 5000 hs  
di 1.000  
nt 10000 lb  
ct 10000 fn

FLAGS  
n  
n  
y  
nn

PROCESSING  
1.00  
65536

TRANSMITTER  
tn C13 sp -1553.6  
sfrq 100.529 wp 24095.7  
tof 1027.4 rfl 9294.3  
tpwr 56 rfp 7739.9  
pw 7.950 rp 77.0  
DECOUPLER lp -254.5

DISPLAY  
dn H1  
dof 0 wc 250  
dm yyy sc 0  
dmm w vs 169  
dpwr 39 th  
dmf 9500 ai cdc ph 4

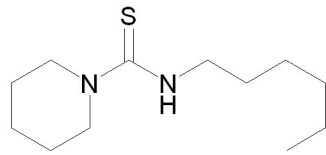

77.315  
77.000  
76.678

48.396  
45.747

31.065  
31.013  
28.877  
28.672  
26.185  
26.119  
25.007  
23.815  
22.081  
13.529

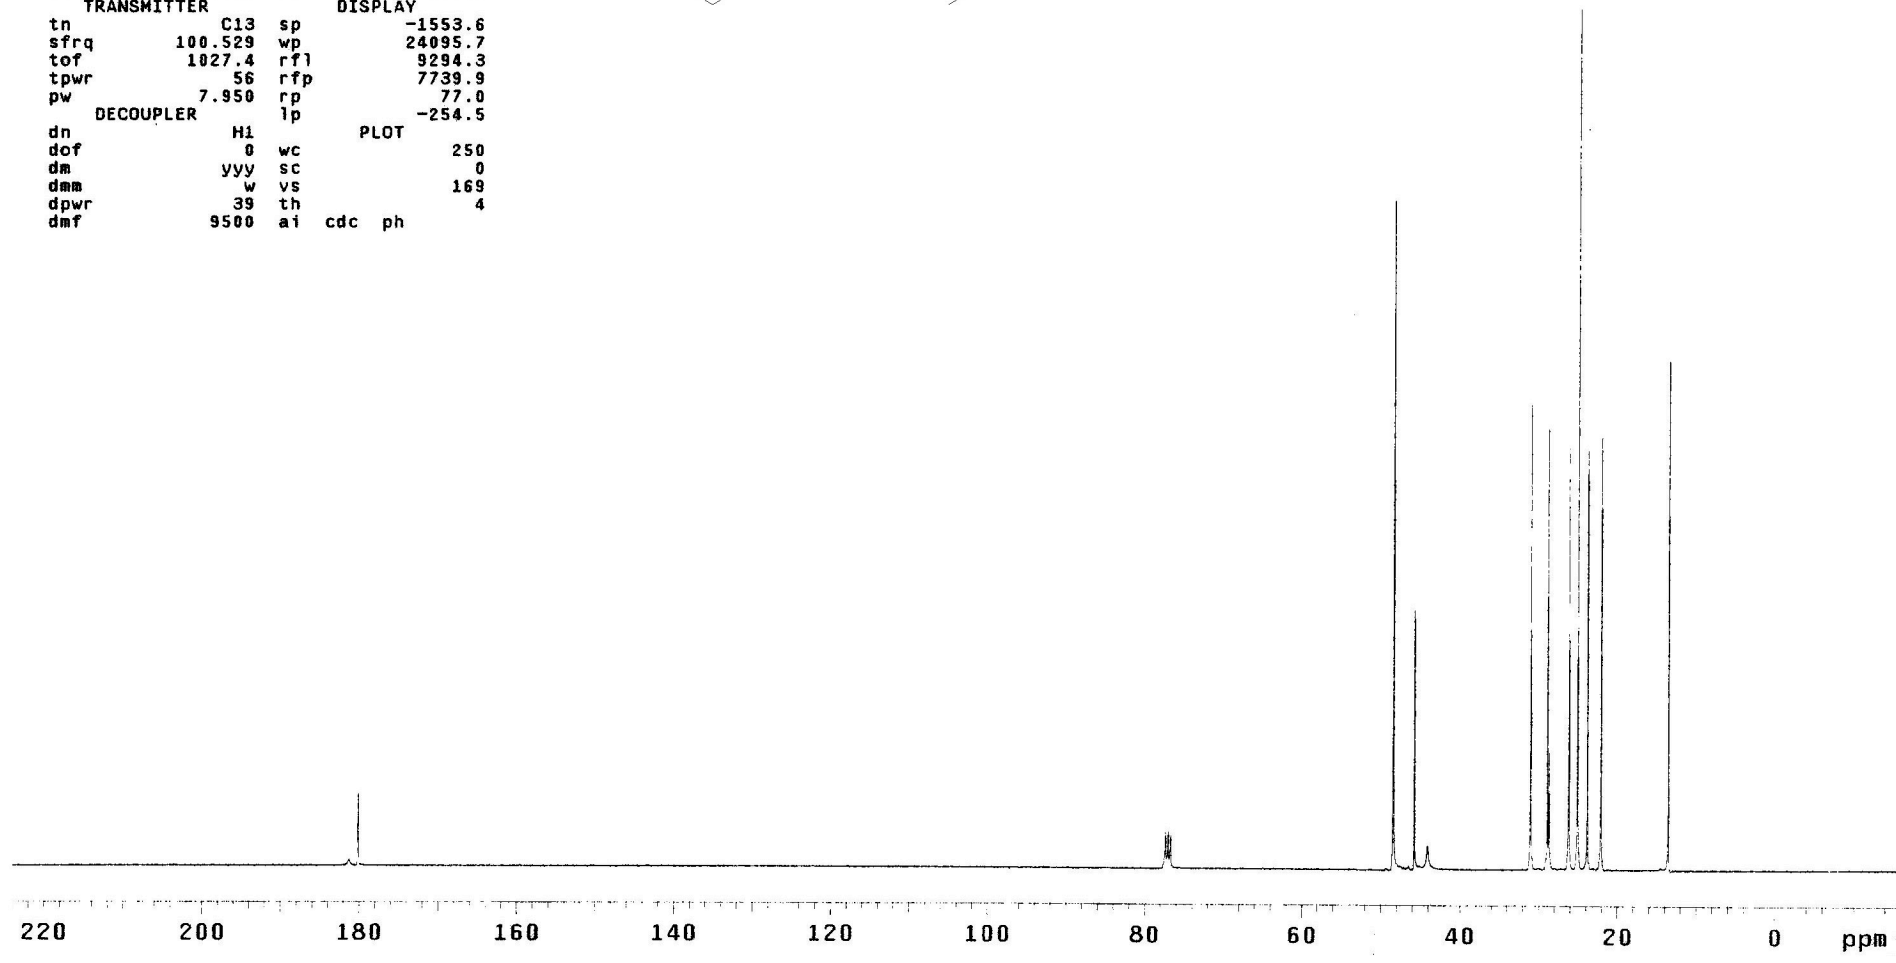

# Std Proton parameters

exp1 s2pu1

| SAMPLE         |                | DEC. & VT  |         |
|----------------|----------------|------------|---------|
| date           | Oct 21 2011    | dfrq       | 100.528 |
| solvent        | CDC13          | dn         | C13     |
| file           | /export/home/~ | dpwr       | 46      |
| cmr/vnmr       | sys/data/2~    | dof        | 0       |
| 0111021_03.fid |                | dm         | nnn     |
| ACQUISITION    |                | dmm        | c       |
| sfrq           | 399.756        | dmf        | 18500   |
| tn             | M1             | PROCESSING |         |
| at             | 2.557          | lb         | 0.10    |
| np             | 22480          | wtfile     |         |
| sw             | 4395.6         | proc       | ft      |
| fb             | not used       | fn         | 65536   |
| bs             | 4              |            |         |
| tpwr           | 56             | werr       |         |
| pw             | 7.5            | wexp       | wft     |
| d1             | 1.000          | wbs        |         |
| tof            | -60.6          | wnt        |         |
| nt             | 16             |            |         |
| ct             | 16             |            |         |
| alock          | y              |            |         |
| gain           | not used       |            |         |
| FLAGS          |                |            |         |
| il             | n              |            |         |
| in             | n              |            |         |
| dp             | y              |            |         |
| DISPLAY        |                |            |         |
| sp             | -177.7         |            |         |
| wp             | 4395.5         |            |         |
| vs             | 209            |            |         |
| sc             | 0              |            |         |
| wc             | 240            |            |         |
| hzmm           | 18.31          |            |         |
| is             | 164.27         |            |         |
| rfl            | 177.9          |            |         |
| rfp            | 0              |            |         |
| th             | 10             |            |         |
| ins            | 100.000        |            |         |
| ai             | cdc ph         |            |         |

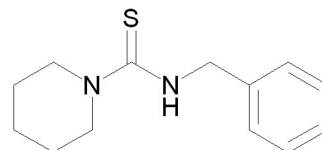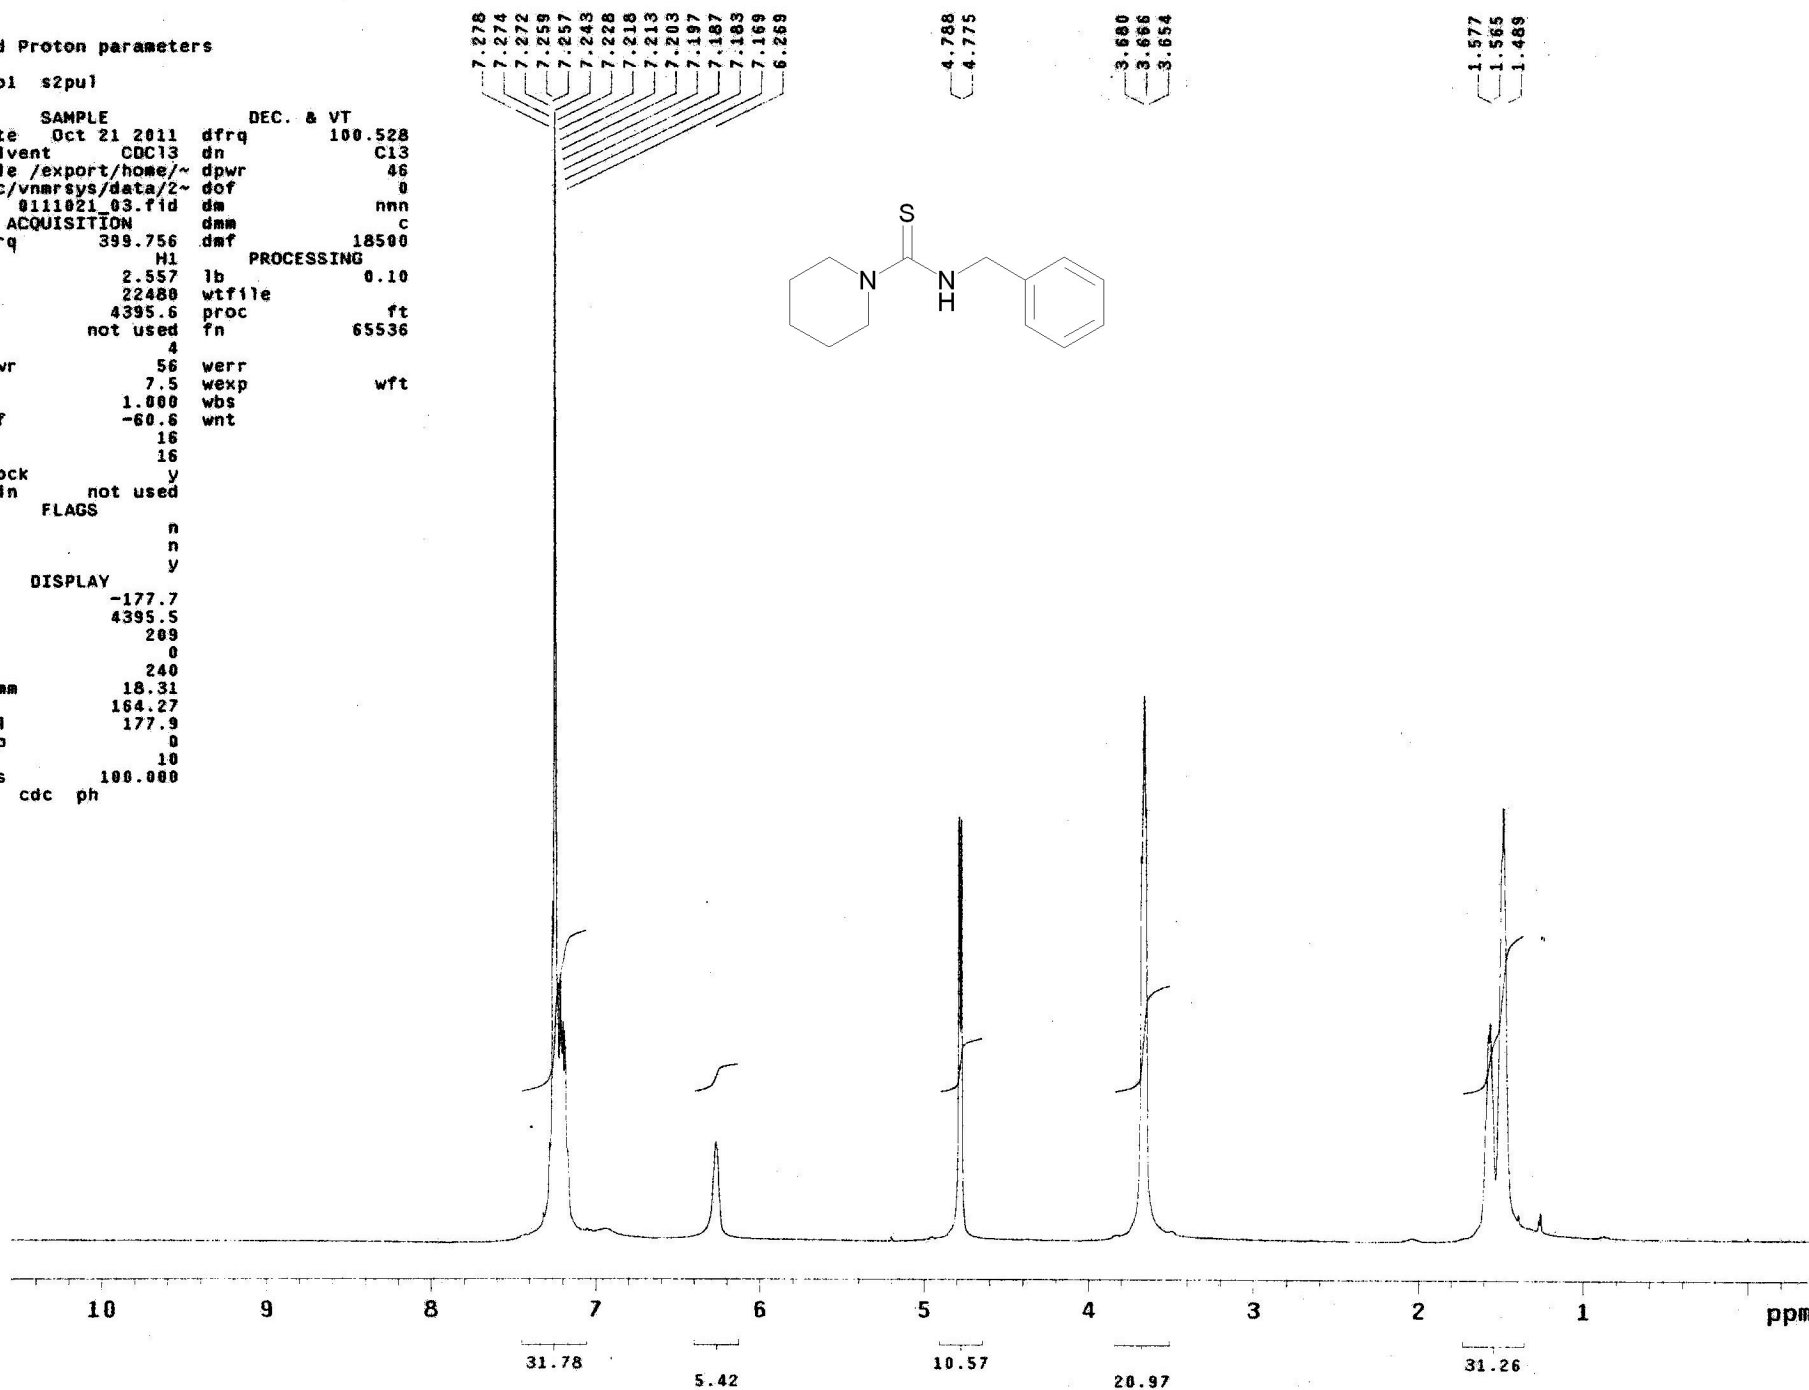

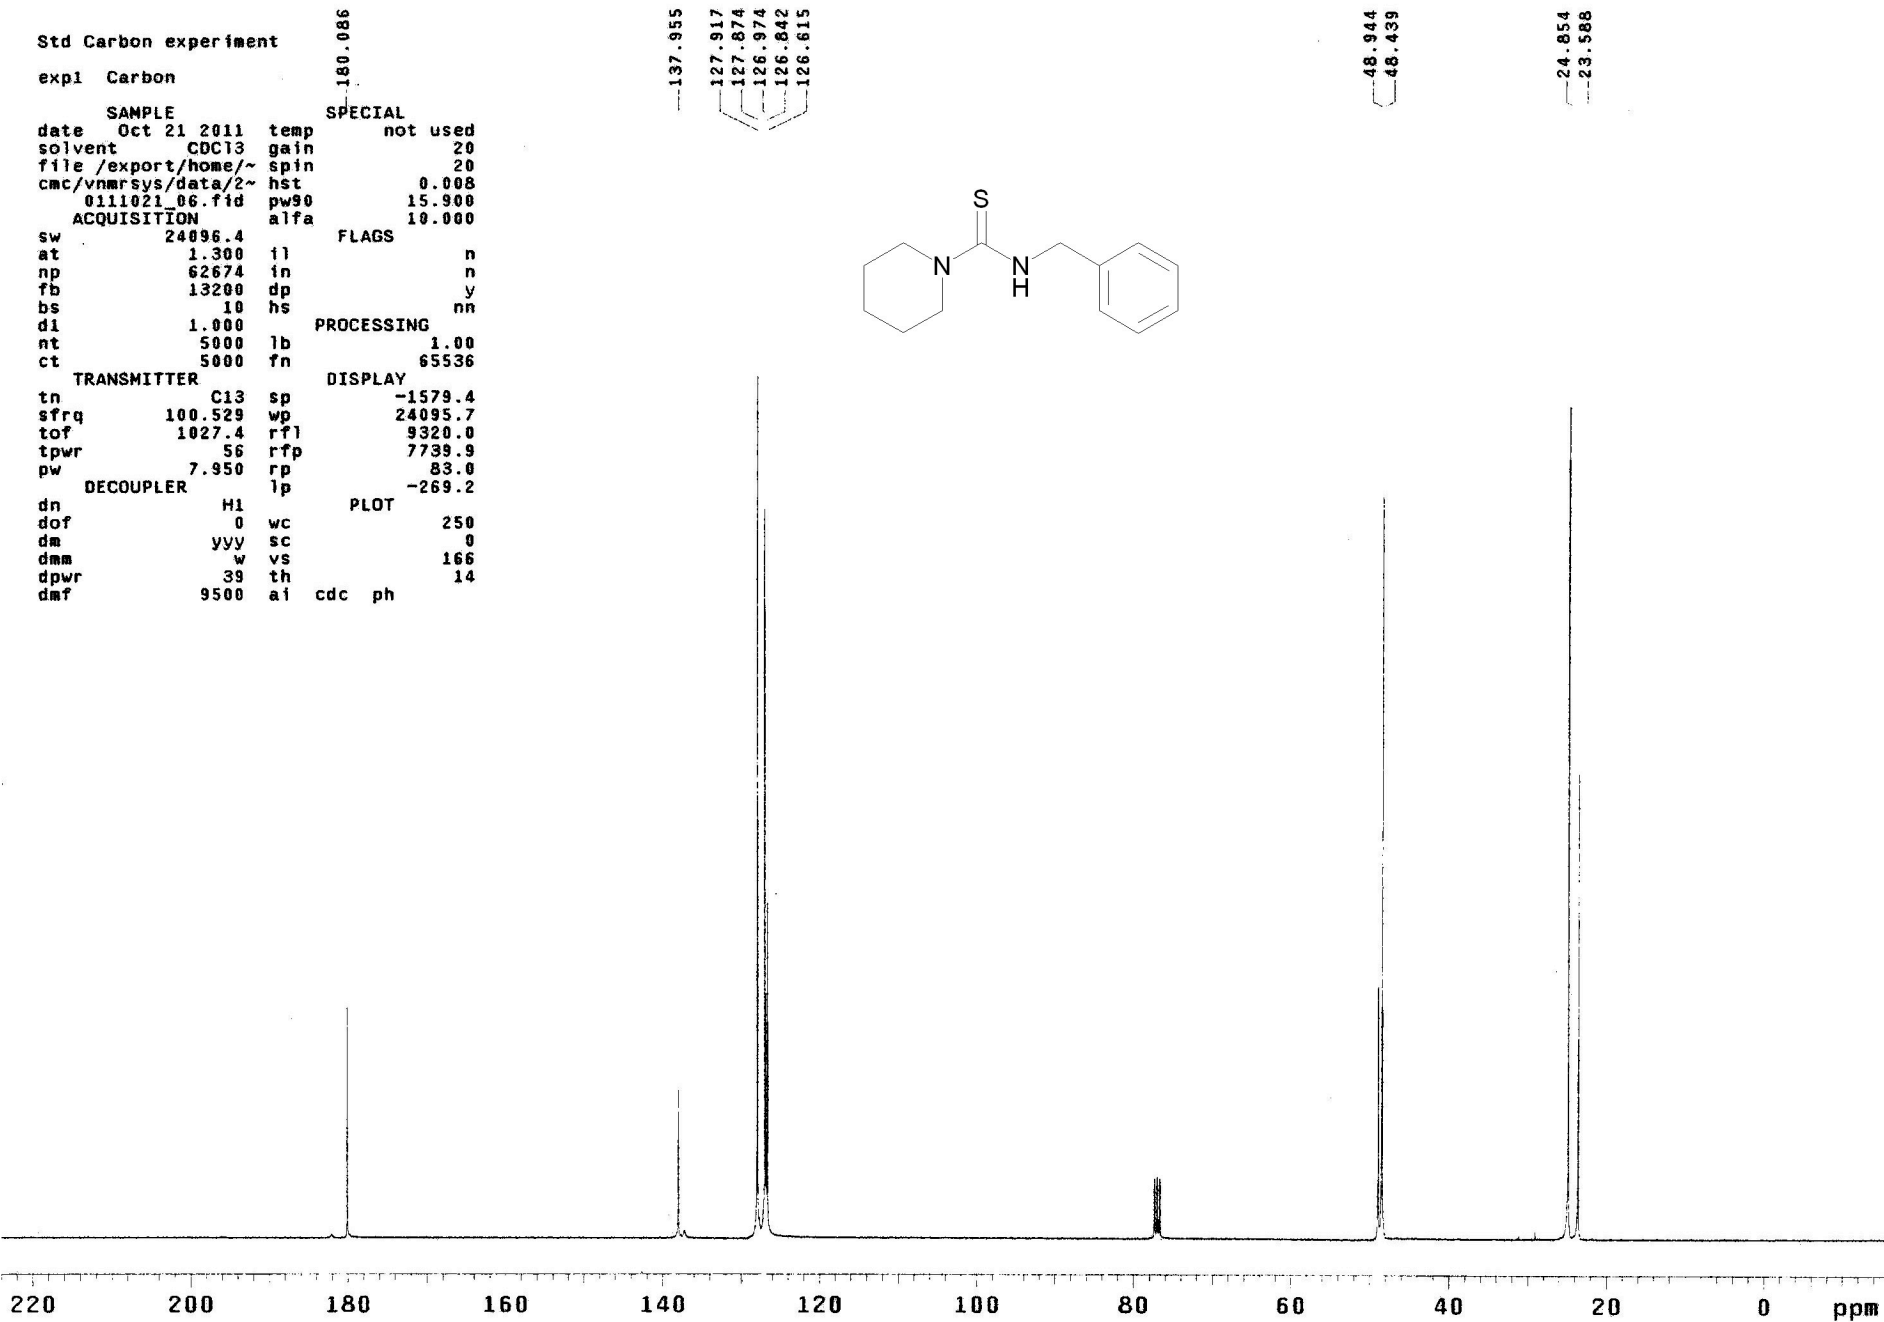

Std Proton parameters  
exp1 s2pu1  
SAMPLE  
date Oct 18 2011 dfrq 100.526  
solvent CDCl3 dn C13  
file /export/home/~ dpwr 46  
cmc/vnmrsys/data/2~ dof 0  
0111018\_09.fid dm nnn  
ACQUISITION dmm c  
sfrq 399.756 dmf 18500  
tn H1  
at 2.557 lb 0.10  
np 22480 wtfile  
sw 4395.6 proc ft  
fb not used fn 65536  
bs 4  
tpwr 56 werr  
pw 7.5 wexp  
di 1.000 wbs  
tof -60.6 wnt  
nt 16  
ct 16  
alock y  
gain not used  
FLAGS  
il n  
in n  
dp y  
DISPLAY  
sp -186.2  
wp 4395.5  
vs 205  
sc 0  
wc 240  
hzmm 18.31  
is 238.42  
rfl 186.3  
rfp 0  
th 10  
ins 100.000  
ai cdc ph

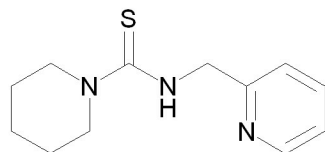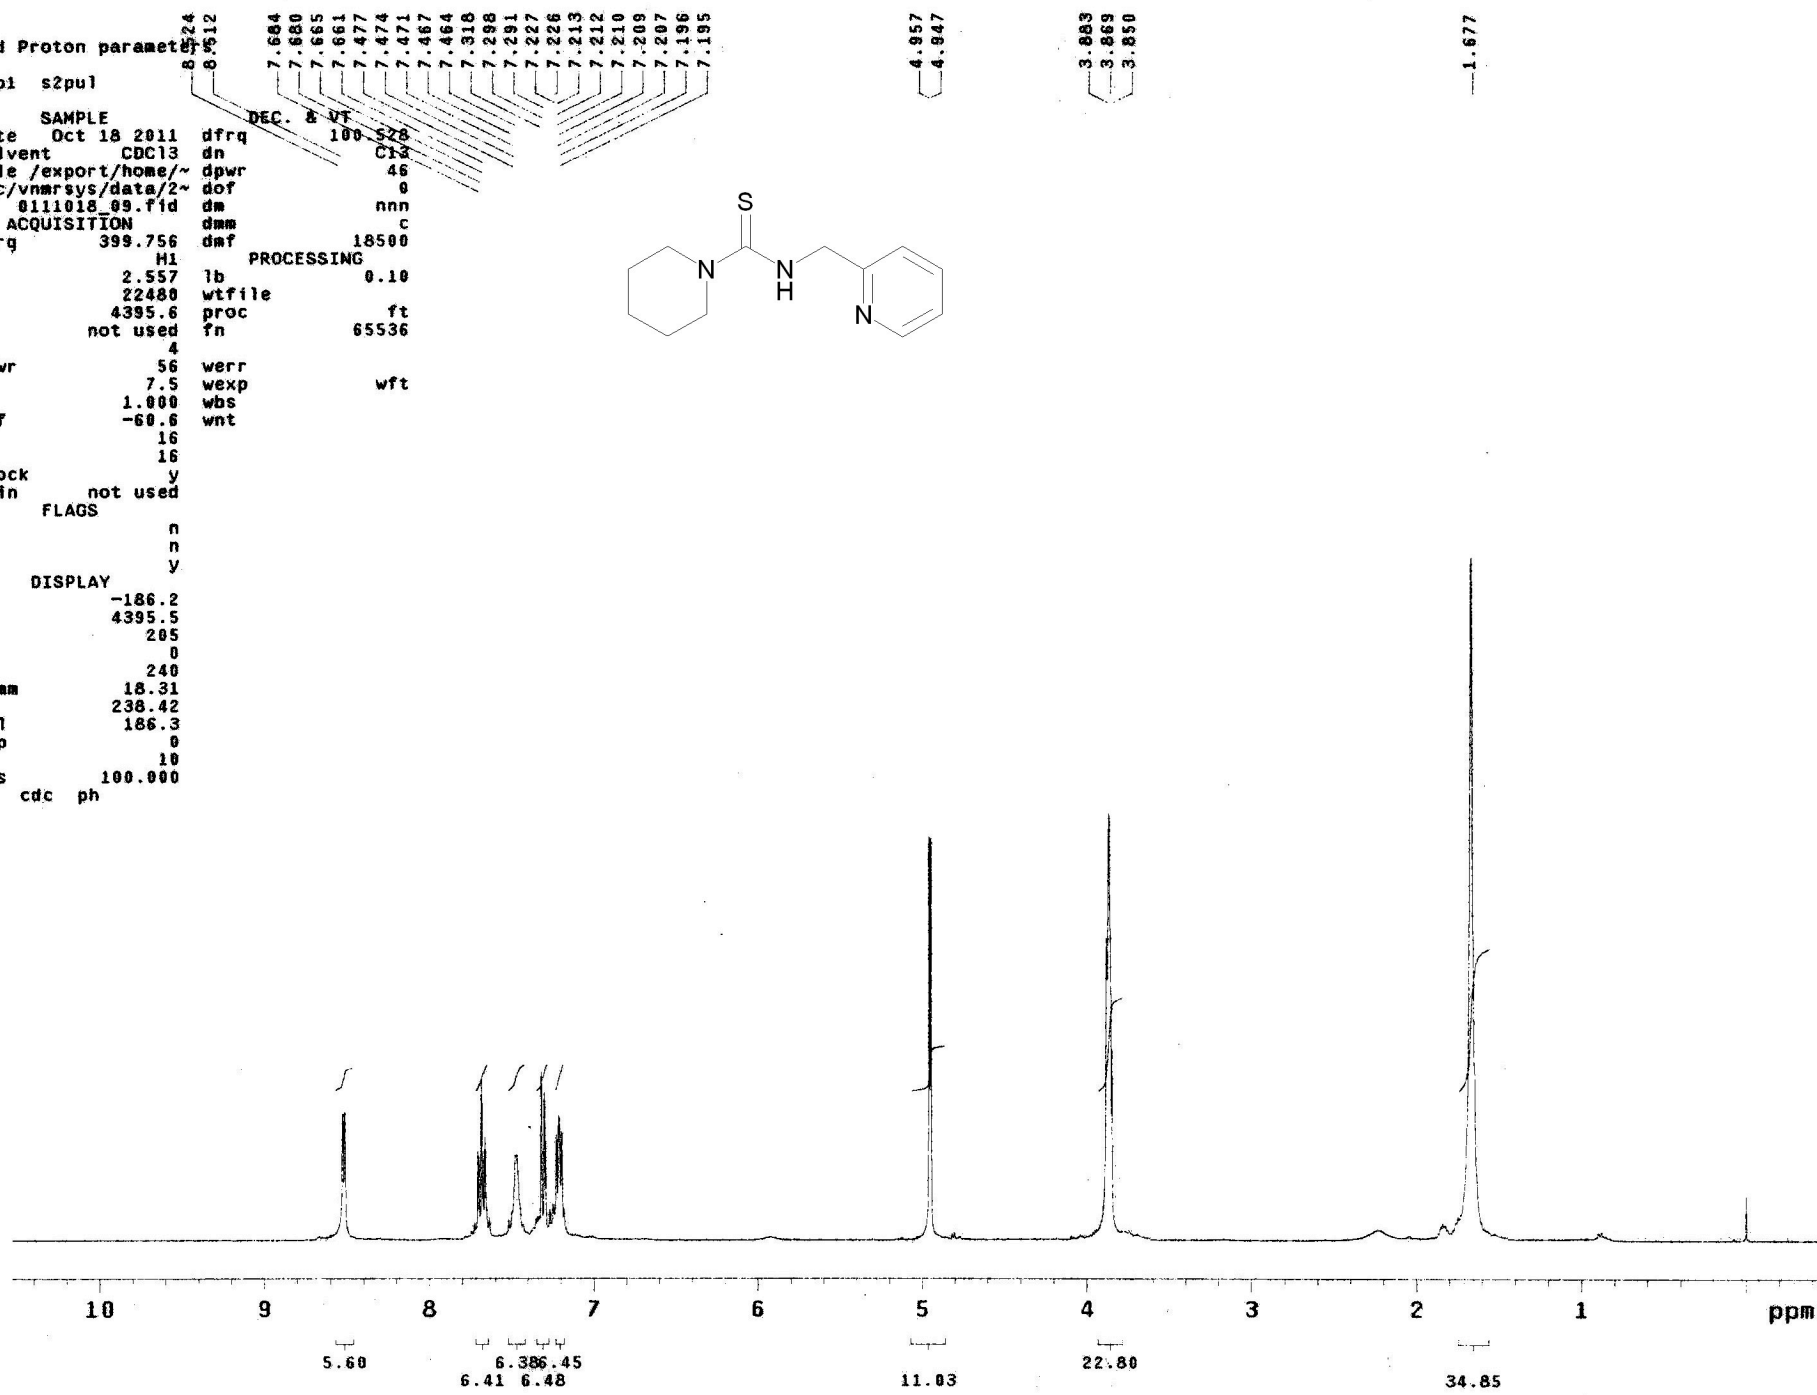

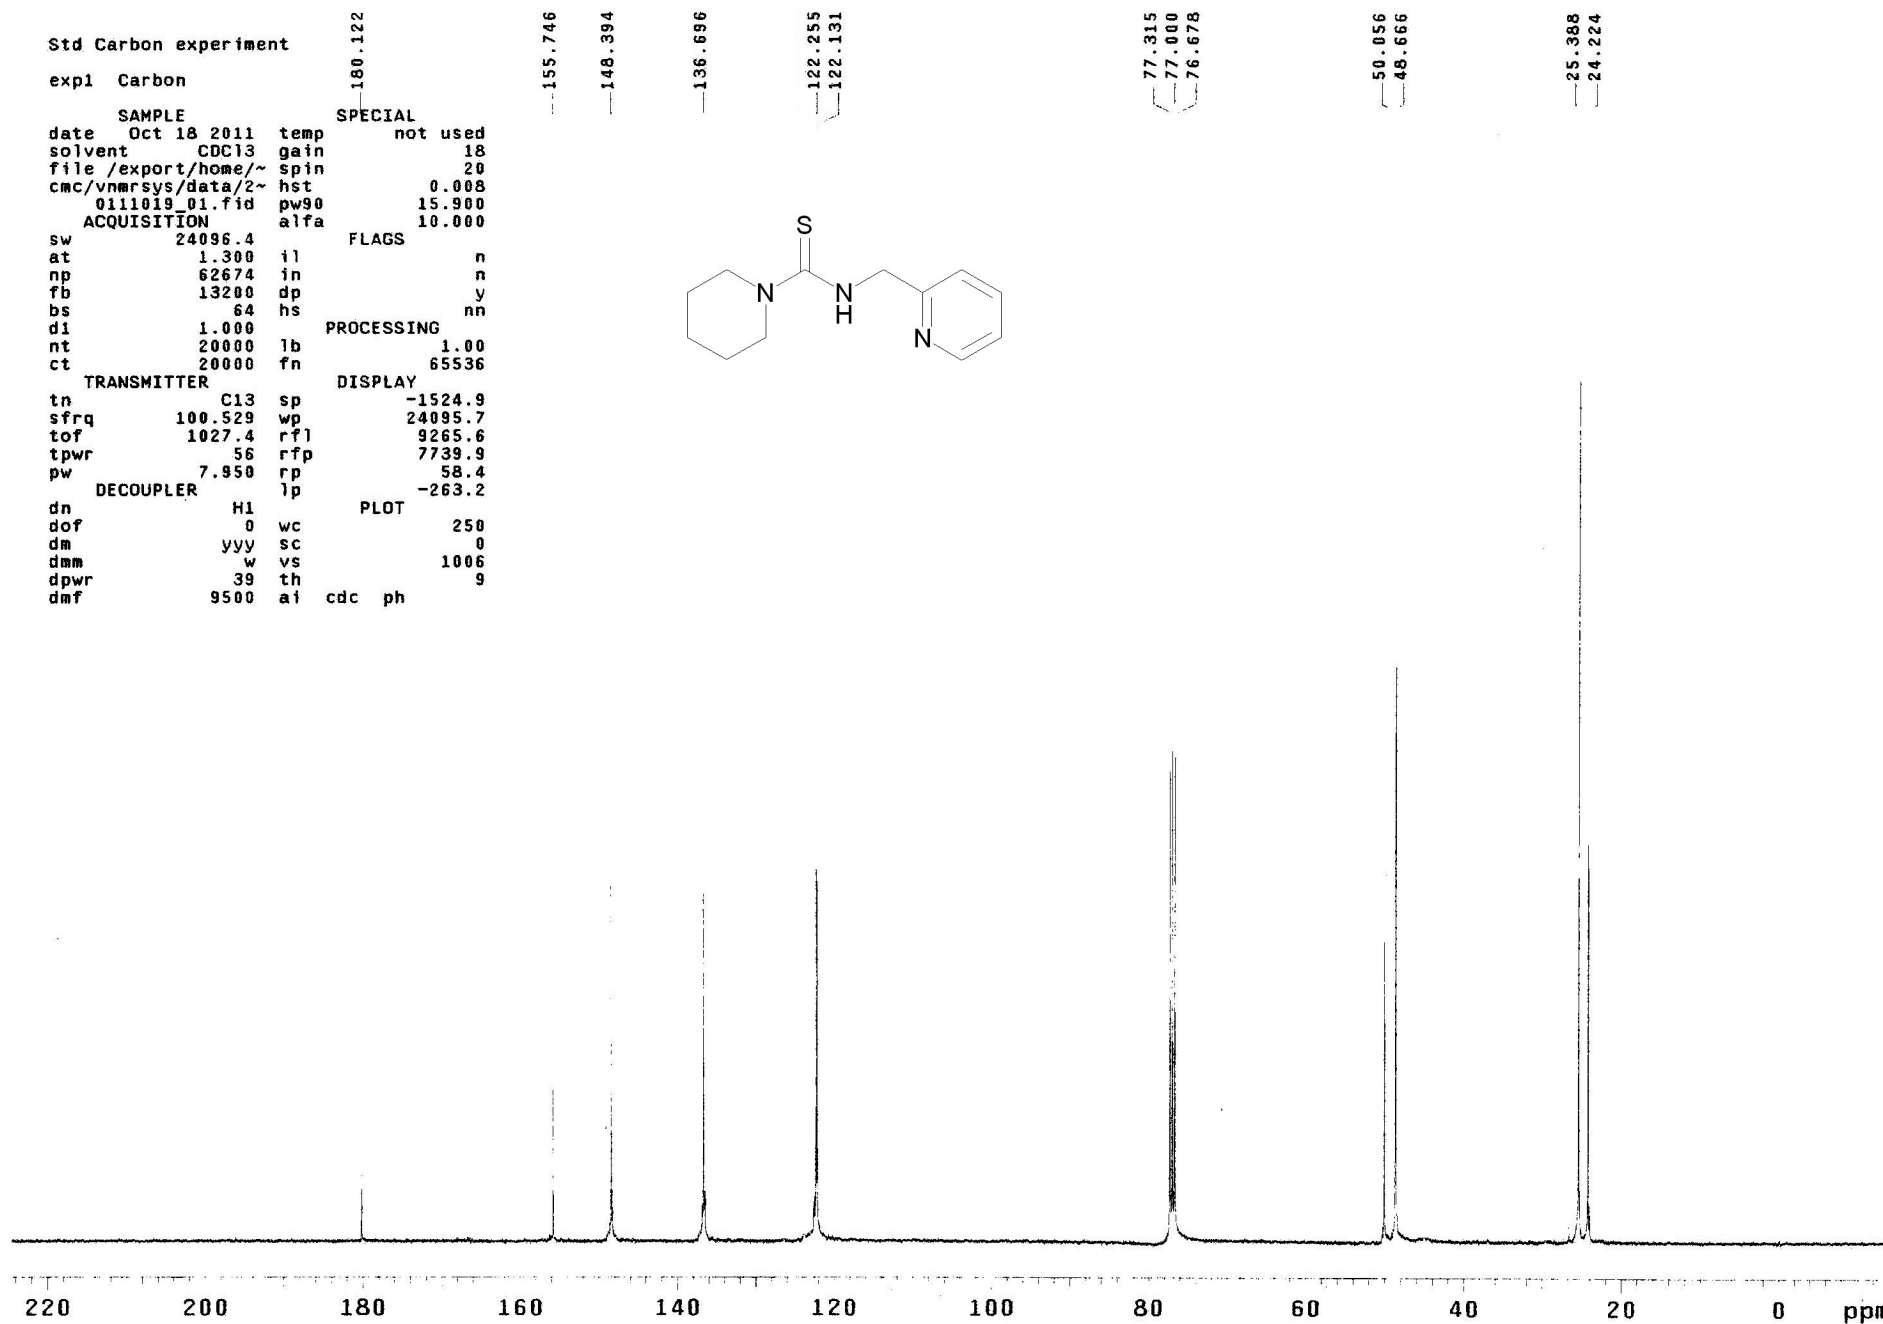

Std Proton parameters

exp1 s2pu1

|                     |                |            |         |
|---------------------|----------------|------------|---------|
| SAMPLE              |                | DEC. & VT  |         |
| date                | Mar 23 2012    | dfrq       | 100.528 |
| solvent             | CDCl3          | dn         | C13     |
| file                | /export/home/~ | dpwr       | 46      |
| cmc/vnmrsys/data/2~ |                | dof        | 0       |
| 0120323_04.fid      |                | dm         | nnn     |
| ACQUISITION         |                | dmm        | c       |
| sfrq                | 399.756        | dmf        | 18500   |
| tn                  | H1             | PROCESSING |         |
| at                  | 2.557          | lb         | 0.10    |
| np                  | 22480          | wtfile     |         |
| sw                  | 4395.6         | proc       | ft      |
| fb                  | not used       | fn         | 65536   |
| bs                  | 4              |            |         |
| tpwr                | 56             | werr       |         |
| pw                  | 7.5            | wexp       | wft     |
| d1                  | 1.000          | wbs        |         |
| tof                 | -60.6          | wnt        |         |
| nt                  | 32             |            |         |
| ct                  | 20             |            |         |
| alock               | y              |            |         |
| gain                | not used       |            |         |
| FLAGS               |                |            |         |
| il                  | n              |            |         |
| in                  | n              |            |         |
| dp                  | y              |            |         |
| DISPLAY             |                |            |         |
| sp                  | -207.6         |            |         |
| wp                  | 4395.5         |            |         |
| vs                  | 191            |            |         |
| sc                  | 0              |            |         |
| wc                  | 240            |            |         |
| hzmm                | 18.31          |            |         |
| is                  | 1336.96        |            |         |
| rfl                 | 3101.9         |            |         |
| rfp                 | 2894.2         |            |         |
| th                  | 11             |            |         |
| ins                 | 100.000        |            |         |
| a1                  | cdc ph         |            |         |

7.303  
7.240  
7.236  
7.232  
7.085  
7.064

3.745

1.640

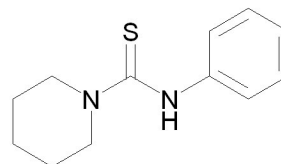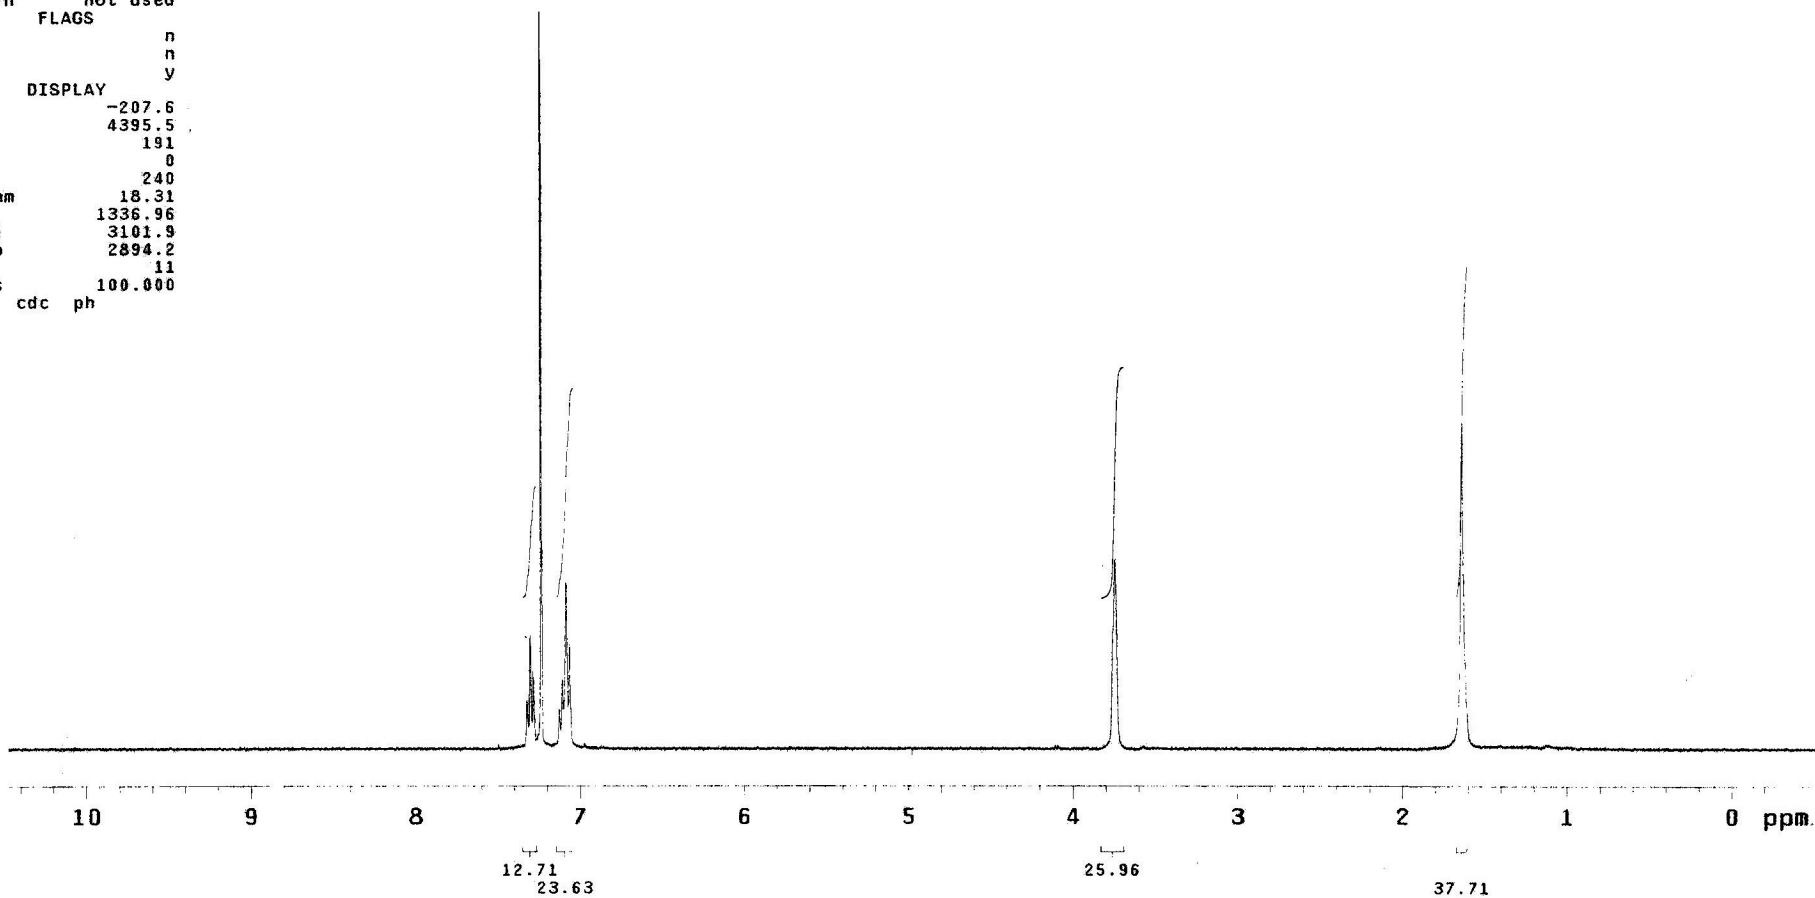

Std Carbon experiment

expl Carbon

|             |            |            |          |
|-------------|------------|------------|----------|
| SAMPLE      |            | SPECIAL    |          |
| date        | Apr 8 2012 | temp       | not used |
| solvent     | CDC13      | gain       | 20       |
| file        | exp        | spin       | 20       |
| ACQUISITION |            | hst        | 0.008    |
| sw          | 24096.4    | pw90       | 15.900   |
| at          | 1.300      | alfa       | 10.000   |
| np          | 62674      | FLAGS      |          |
| fb          | 13200      | il         | n        |
| bs          | 500        | in         | n        |
| dl          | 1.000      | dp         | y        |
| nt          | 20000      | hs         | nn       |
| ct          | 18500      | PROCESSING |          |
| TRANSMITTER |            | lb         | 1.00     |
| tn          | C13        | fn         | 65536    |
| sfrq        | 100.529    | DISPLAY    |          |
| tof         | 1027.4     | sp         | -1519.1  |
| tpwr        | 56         | wp         | 24095.7  |
| pw          | 7.950      | rfl        | 9259.7   |
| DECOUPLER   |            | rfl        | 7739.9   |
| dn          | H1         | rp         | 81.8     |
| dof         | 0          | lp         | -259.8   |
| dm          | yyy        | PLOT       |          |
| dmm         | w          | wc         | 250      |
| dpwr        | 39         | sc         | 0        |
| dmt         | 9500       | vs         | 887      |
|             |            | th         | 2        |
|             |            | ai         | cdc ph   |

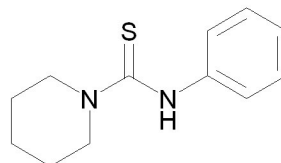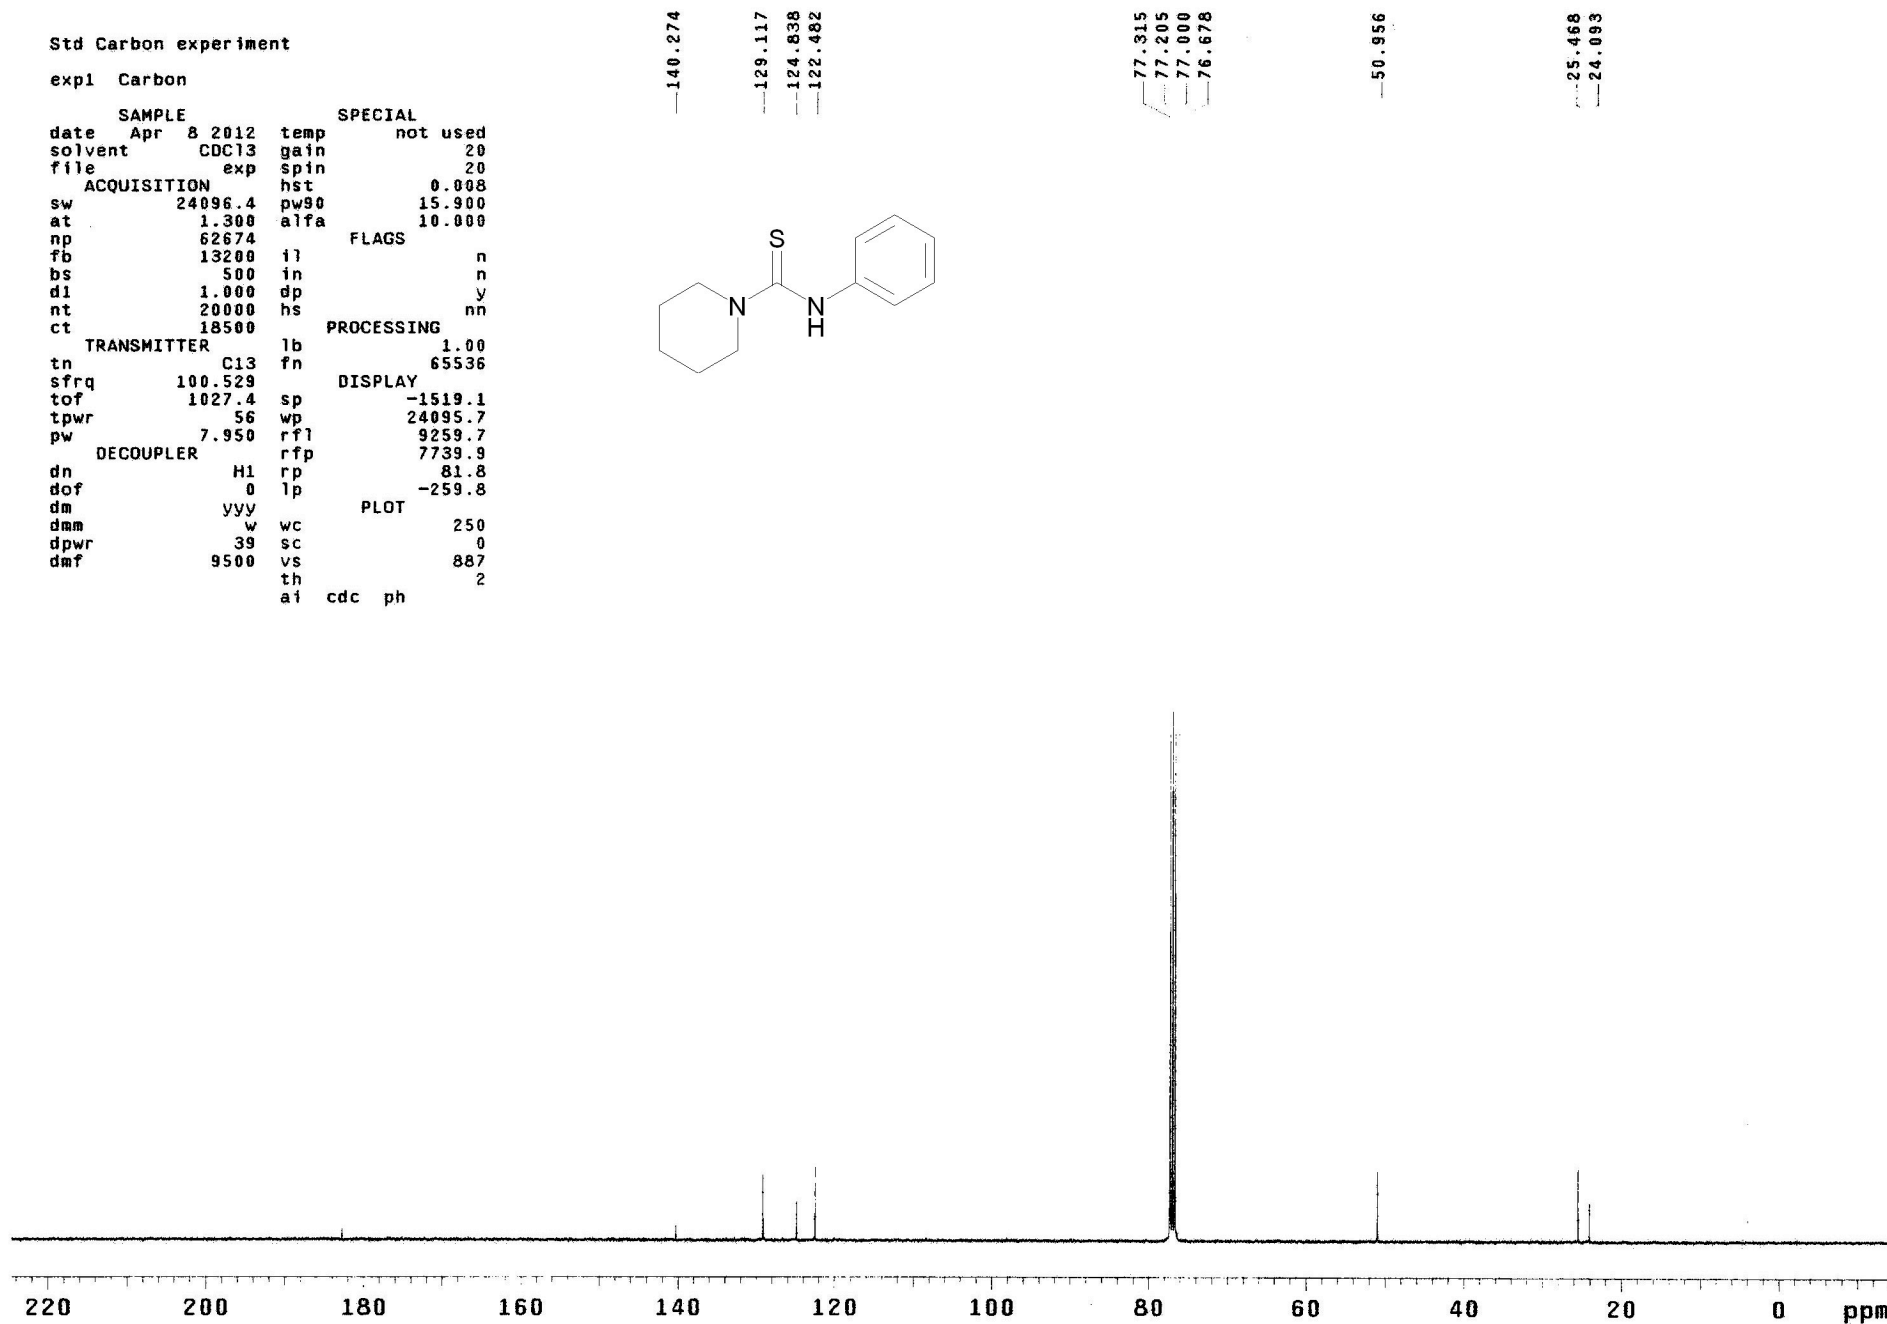

Std Proton parameters

```
exp1 s2pul1
SAMPLE DEC. & VT
date Oct 5 2011 dfrq 100.528
solvent CDCl3 dn C13
file /export/home/~ dpwr 46
cmc/vnmrsys/data/2~ dof 0
0111005_09.fid dm nnn
ACQUISITION dmm c
sfrq 399.756 dmf 18500
tn H1 PROCESSING
at 2.557 lb 0.10
np 22480 wtfile
sw 4395.6 proc ft
fb not used fn 65536
bs 4
tpwr 56 werr
pw 7.5 wexp wft
d1 1.000 wbs
tof -60.6 wnt
nt 32
ct 20
alock y
gain not used
FLAGS
il n
in n
dp y
DISPLAY
sp -207.3
wp 4395.5
vs 132
sc 0
wc 240
hzmm 18.31
is 340.69
rfl 3101.7
rfp 2894.2
th 4
ins 100.000
ai cdc ph
```

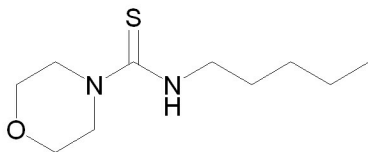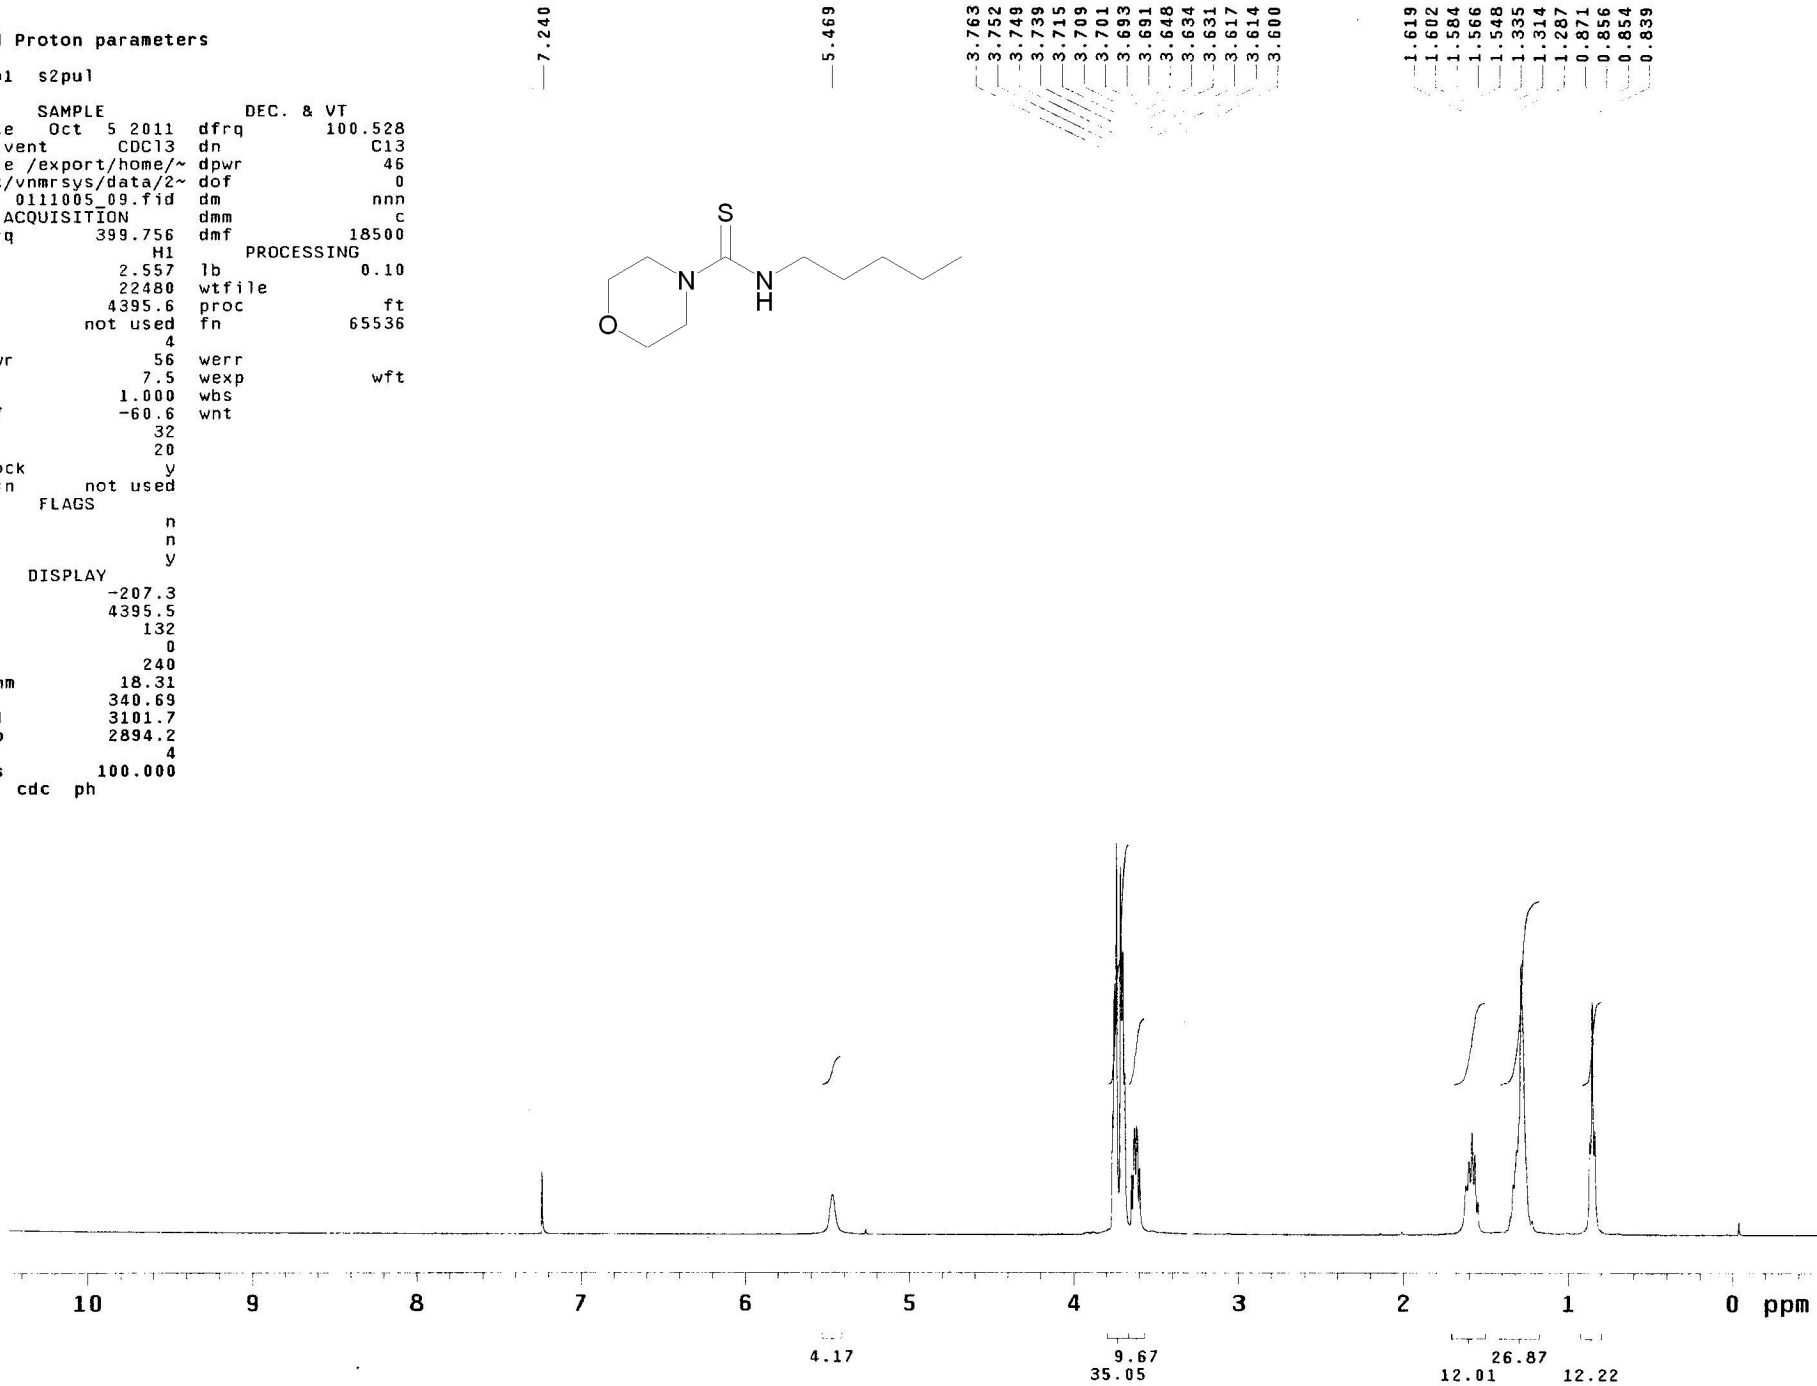

Std Carbon experiment

exp1 Carbon

SAMPLE SPECIAL  
date Oct 12 2011 temp not used  
solvent CDC13 gain 20  
file /export/home/~ spin 20  
cmc/vnmrsys/data/2~ hst 0.008  
0111013\_01.fid pw90 15.900  
ACQUISITION alfa 10.000  
sw 24096.4  
at 1.300 il n  
np 62674 in n  
fb 13200 dp y  
bs 7500 hs nn  
dl 1.000  
nt 15000 lb PROCESSING 1.00  
ct 15000 fn 65536  
TRANSMITTER DISPLAY  
tn C13 sp -1570.5  
sfrq 100.529 wp 24095.7  
tof 1027.4 rfl 9311.2  
tpwr 56 rfp 7739.9  
pw 7.950 rp 74.4  
DECOUPLER lp -249.5  
dn H1  
dof 0 wc PLOT 250  
dm yyy sc 0  
dmm w vs 48  
dpwr 39 th 1  
dmf 9500 ai cdc ph

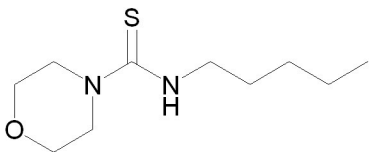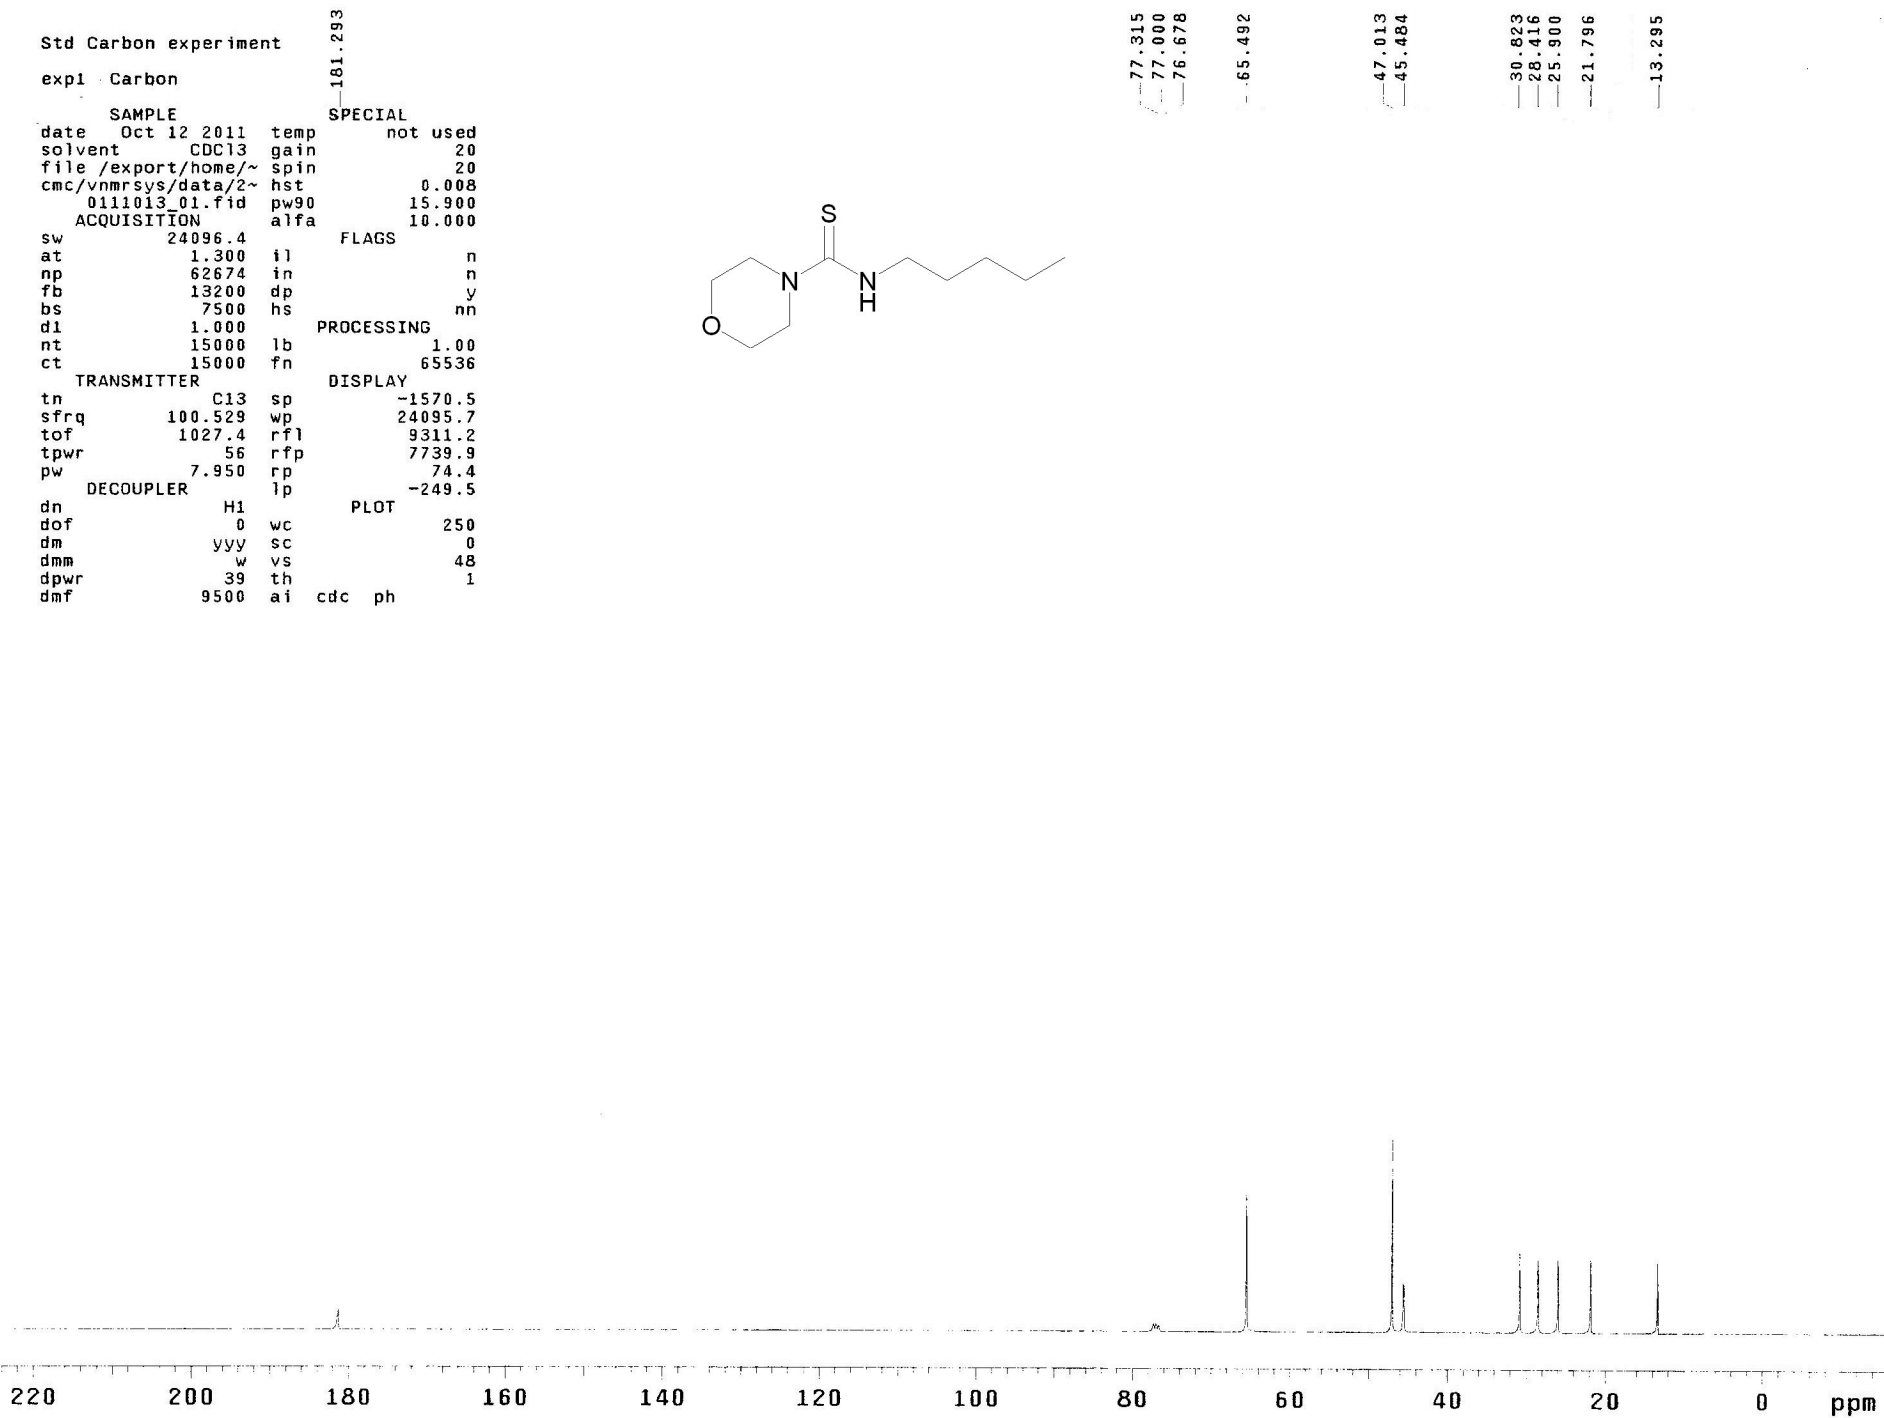

Std Proton parameters

exp1 s2pu1

SAMPLE DEC. & VT  
date Oct 24 2011 dfrq 100.528  
solvent CDCl3 dn C13  
file /export/home/~ dpwr 46  
cmc/vnmrsys/data/2~ dof 0  
0111024\_03.fid dm nnn  
ACQUISITION dmm c  
sfrq 399.756 dmf 18500  
tn H1 PROCESSING  
at 2.557 lb 0.10  
np 22480 wtfile  
sw 4395.6 proc ft  
fb not used fn 65536  
bs 4  
tpwr 56 werr  
pw 7.5 wexp wft  
dl 1.000 wbs  
tof -60.6 wnt  
nt 16  
ct 16  
alock y  
gain not used  
FLAGS  
il n  
in n  
dp y  
DISPLAY  
sp -206.6  
wp 4395.5  
vs 192  
sc 0  
wc 240  
hzmm 18.31  
is 445.13  
rfl 3101.0  
rfp 2894.2  
th 4  
ins 100.000  
ai cdc ph

7.349  
7.331  
7.329  
7.314  
7.298  
7.286  
7.278  
7.268  
7.240

5.687

4.844  
4.832

3.777  
3.767  
3.754  
3.709  
3.695  
3.685

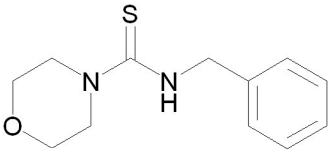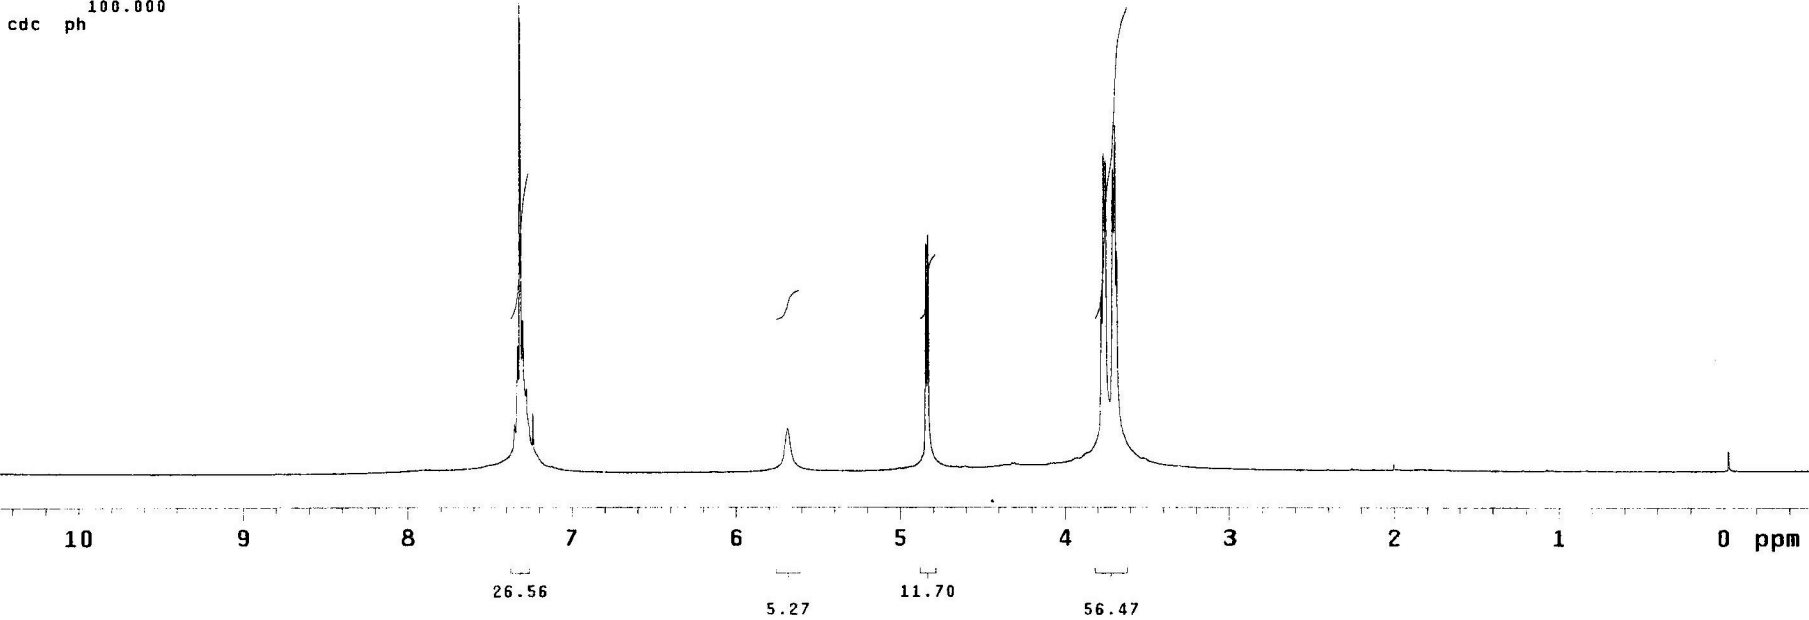

```

Std Carbon experiment
expi Carbon
SAMPLE
date Nov 15 2011 temp not used
solvent CDC13 gain 20
file /export/home/~ spin 20
cmc/vnmr/sys/data/2~ hst 0.008
0111115_05.fid pw90 15.900
ACQUISITION alfa 10.000
sw 24096.4
at 1.300 il n
np 62674 in n
fb 13200 dp y
bs 16 hs nn
dl 1.000
nt 10000 lb PROCESSING 1.00
ct 5968 fn 65536
TRANSMITTER DISPLAY
tn C13 sp -1562.4
sfrq 100.529 wp 24095.7
tof 1027.4 rfl 9303.1
tpwr 56 rfp 7739.9
pw 7.950 rp 74.0
DECOUPLER lp -267.6
dn H1
dof 0 wc PLOT 250
dm yyv sc 0
dmm w vs 215
dpwr 39 th 3
dmf 9500 ai cdc ph

```

137.552  
128.195  
127.976  
127.252  
127.098

77.315  
77.000  
76.678  
65.609  
49.303  
47.254

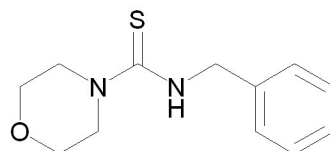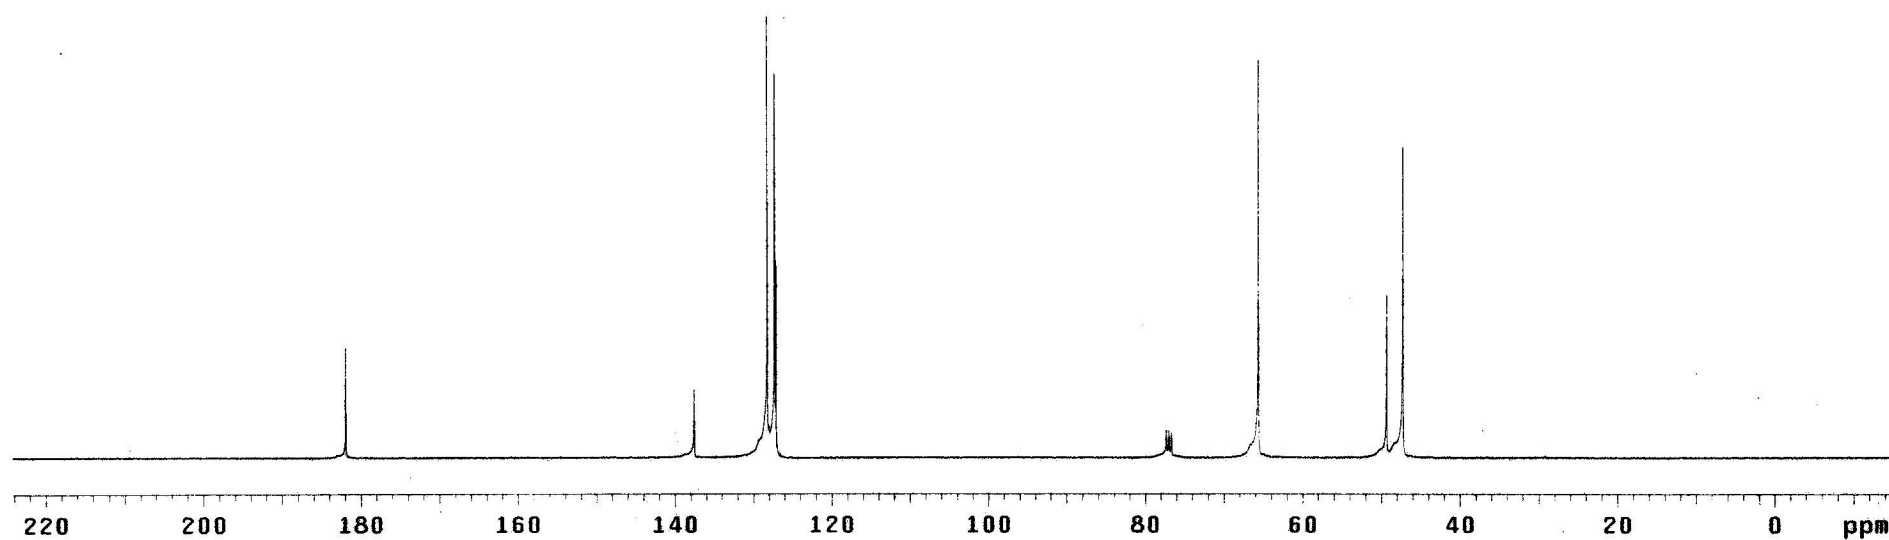

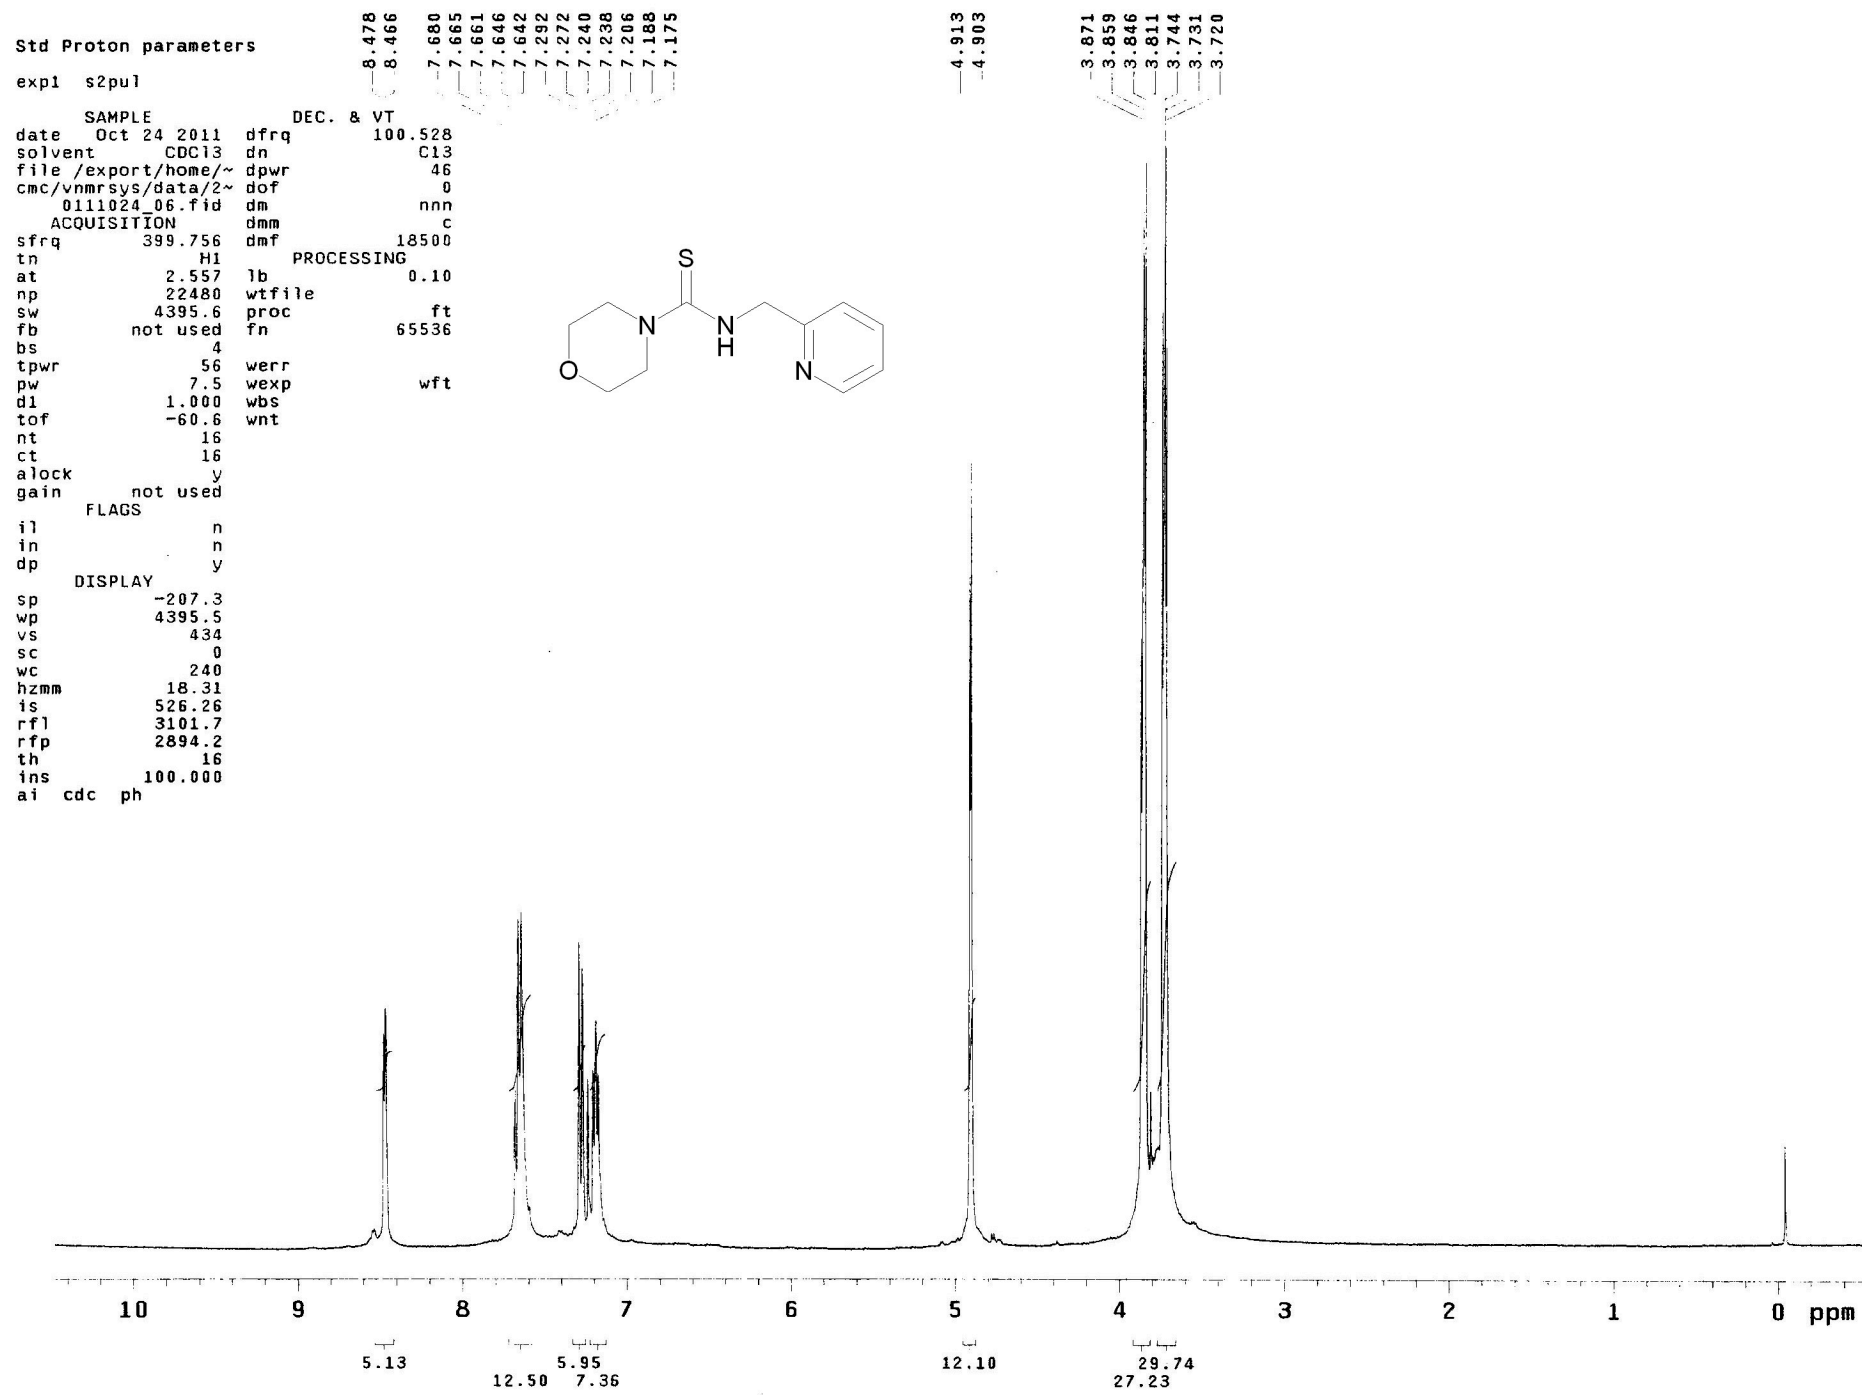

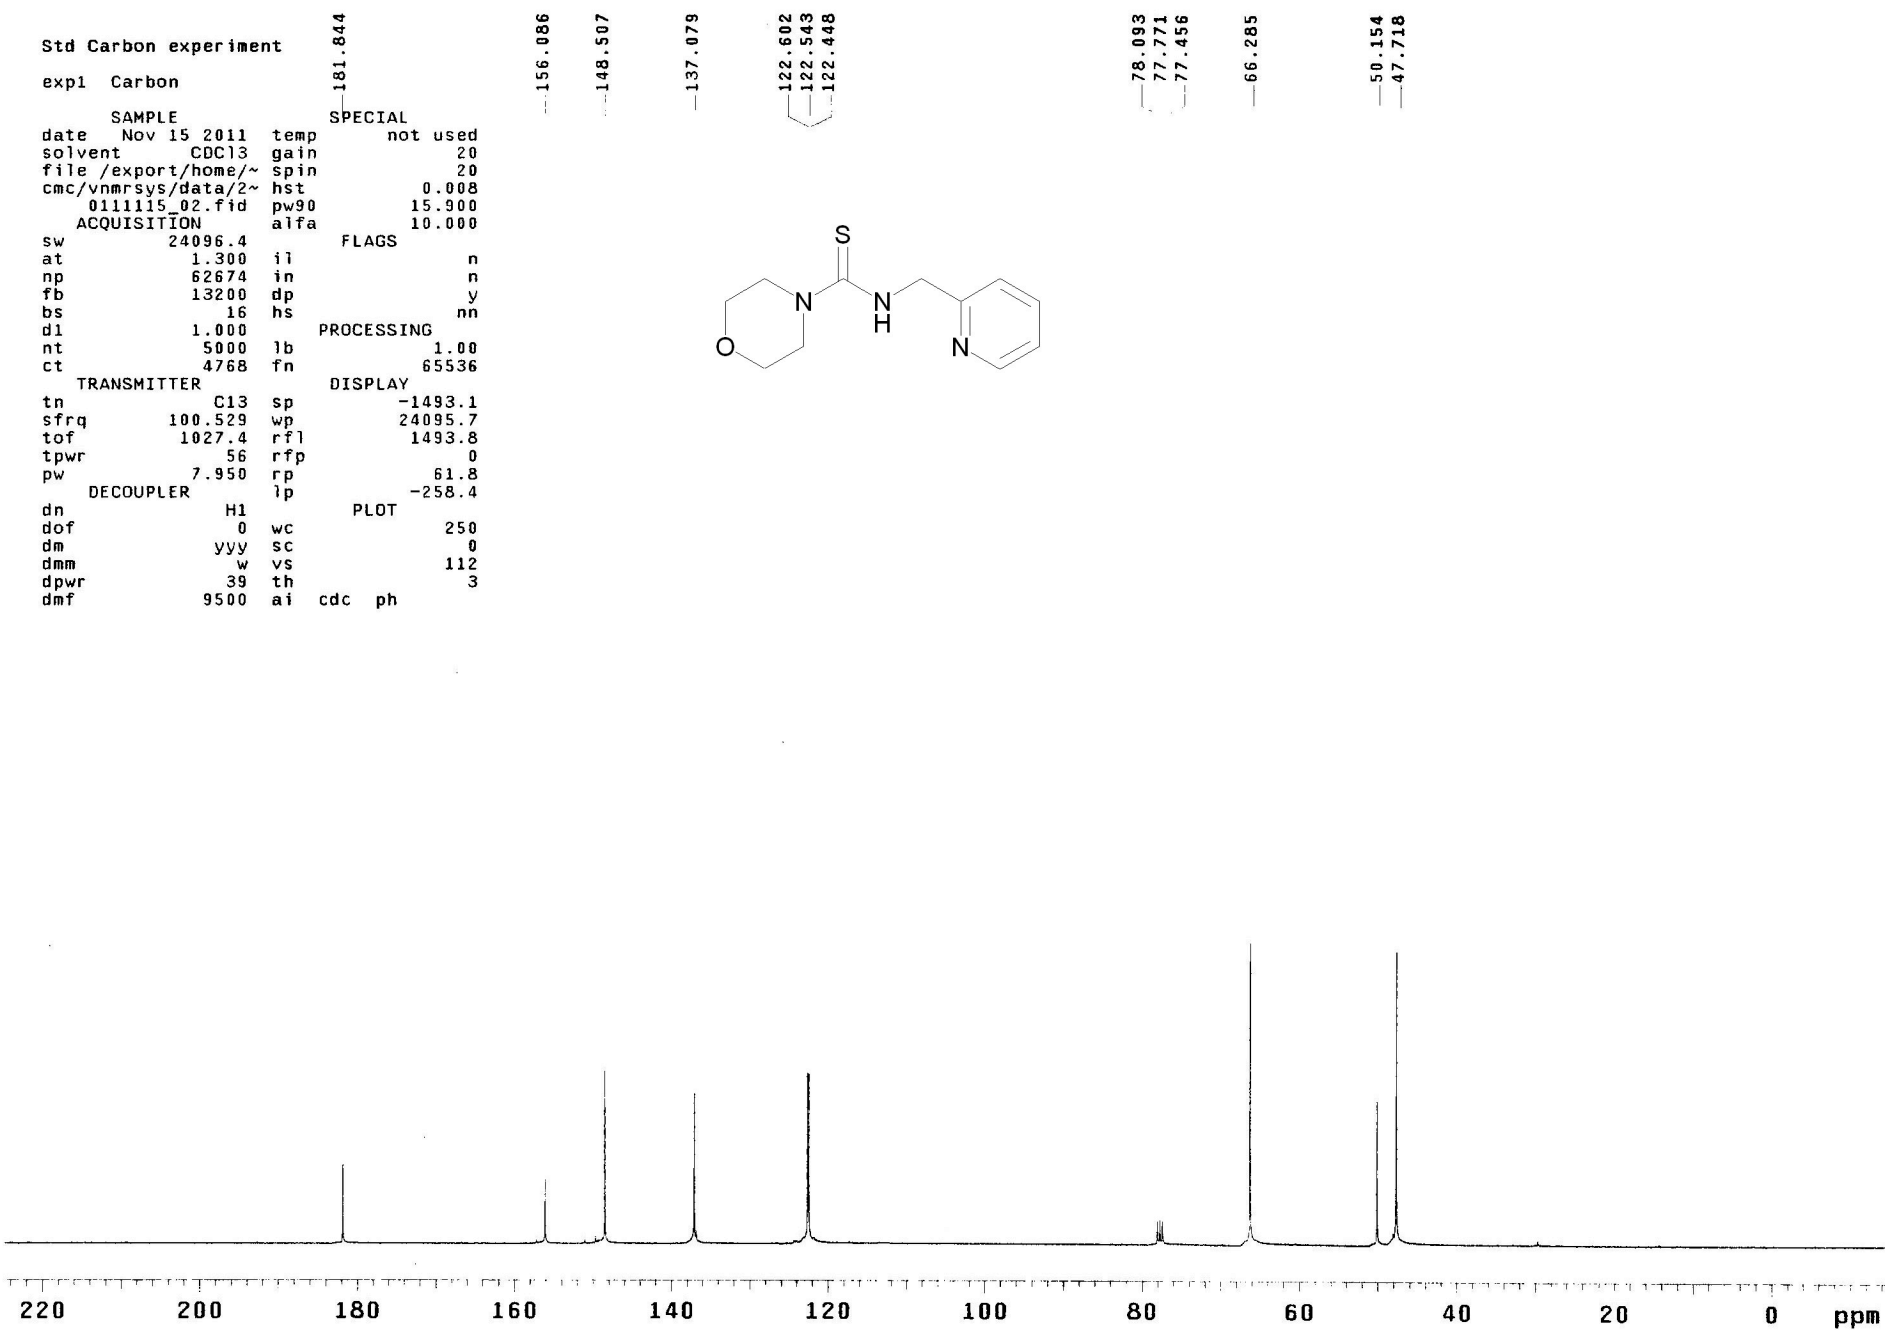

# Std Proton parameters

exp1 s2pu1

| SAMPLE              |                | DEC. & VT  |         |
|---------------------|----------------|------------|---------|
| date                | Oct 18 2011    | dfrq       | 100.528 |
| solvent             | CDC13          | dn         | C13     |
| file                | /export/home/~ | dpwr       | 46      |
| cmc/vnmrsys/data/2~ |                | dof        | 0       |
| 0111018_06.fid      |                | dm         | nnn     |
| ACQUISITION         |                |            |         |
| sfrq                | 399.756        | dmm        | c       |
| tn                  | H1             | dmf        | 18500   |
|                     |                | PROCESSING |         |
| at                  | 2.557          | lb         | 0.10    |
| np                  | 22480          | wtfile     |         |
| sw                  | 4395.6         | proc       | ft      |
| fb                  | not used       | fn         | 65536   |
| bs                  | 4              |            |         |
| tpwr                | 56             | werr       |         |
| pw                  | 7.5            | wexp       | wft     |
| di                  | 1.000          | wbs        |         |
| tof                 | -60.6          | wnt        |         |
| nt                  | 16             |            |         |
| ct                  | 16             |            |         |
| alock               | y              |            |         |
| gain                | not used       |            |         |
| FLAGS               |                |            |         |
| il                  | n              |            |         |
| in                  | n              |            |         |
| dp                  | y              |            |         |
| DISPLAY             |                |            |         |
| sp                  | -205.7         |            |         |
| wp                  | 4395.5         |            |         |
| vs                  | 127            |            |         |
| sc                  | 0              |            |         |
| wc                  | 240            |            |         |
| hzmm                | 18.31          |            |         |
| is                  | 400.26         |            |         |
| rfl                 | 3100.0         |            |         |
| rfp                 | 2894.2         |            |         |
| th                  | 13             |            |         |
| ins                 | 100.000        |            |         |
| ai                  | cdc ph         |            |         |

7.338  
7.319  
7.300  
7.242  
7.240  
7.139  
7.131  
7.121  
7.111

3.815  
3.803  
3.791  
3.718  
3.705  
3.694

-0.023  
-0.026

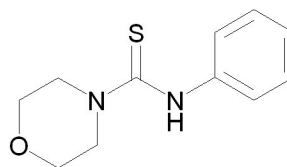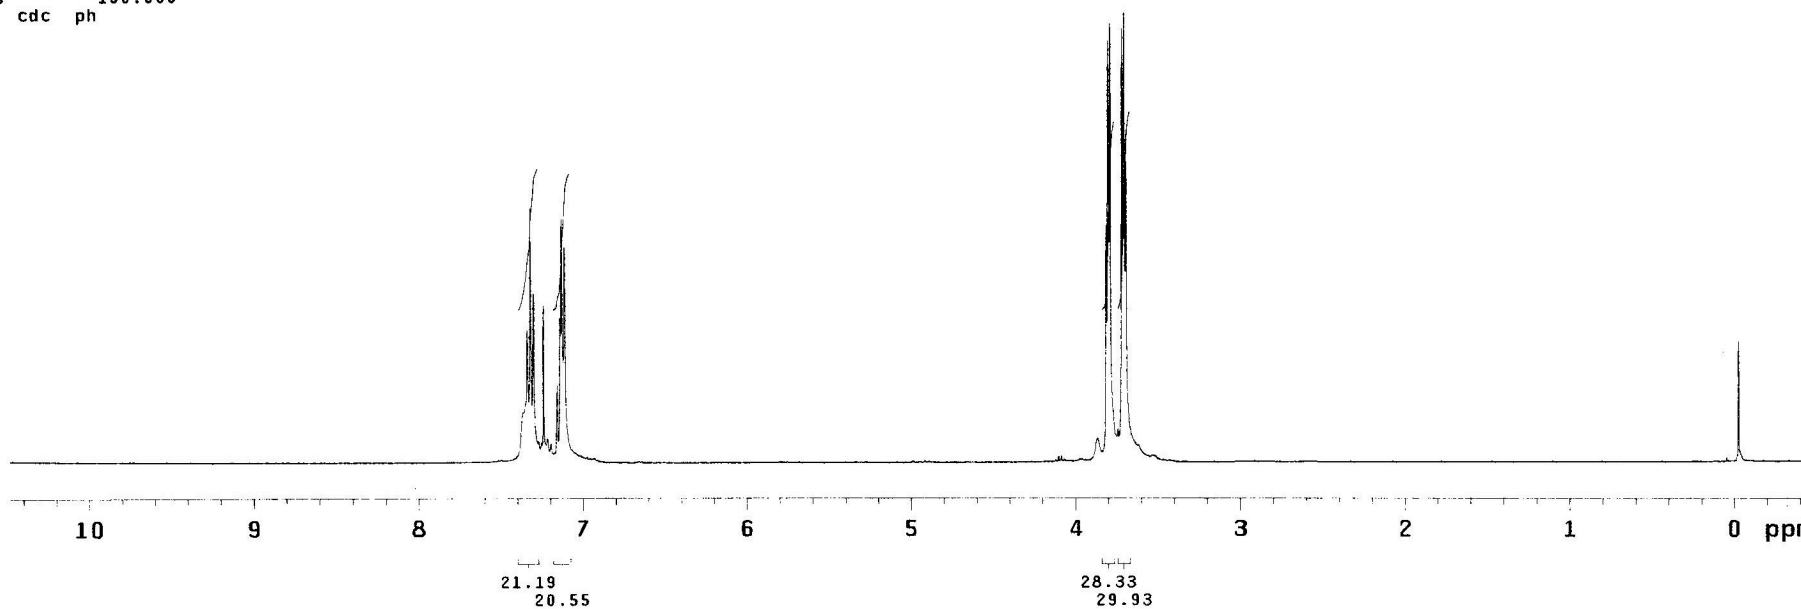

Std Carbon experiment

expl Carbon

SAMPLE SPECIAL

date Oct 21 2011 temp not used

solvent CDCl3 gain 20

file /export/home/~ spin 20

cmc/vnmrsys/data/2~ hst 0.008

0111022\_01.fid pw90 15.900

ACQUISITION alfa 10.000

sw 24096.4

at 1.300 il

np 62674 in

fb 13200 dp

bs 16 hs

dl 1.000

nt 20000 lb

ct 20000 fn

TRANSMITTER DISPLAY

tn C13 sp -1523.5

sfrq 100.529 wp 24095.7

tof 1027.4 rfl 9264.1

tpwr 56 rfp 7739.9

pw 7.950 rp 49.3

DECOUPLER lp -267.7

dn H1

dof 0 wc

dm yyy sc

dmm w vs

dpwr 39 th

dmf 9500 ai cdc ph

183.473

139.871

129.051

125.255

123.243

77.322

77.000

76.685

66.078

49.529

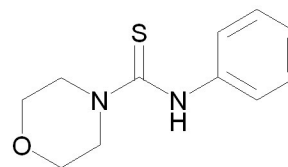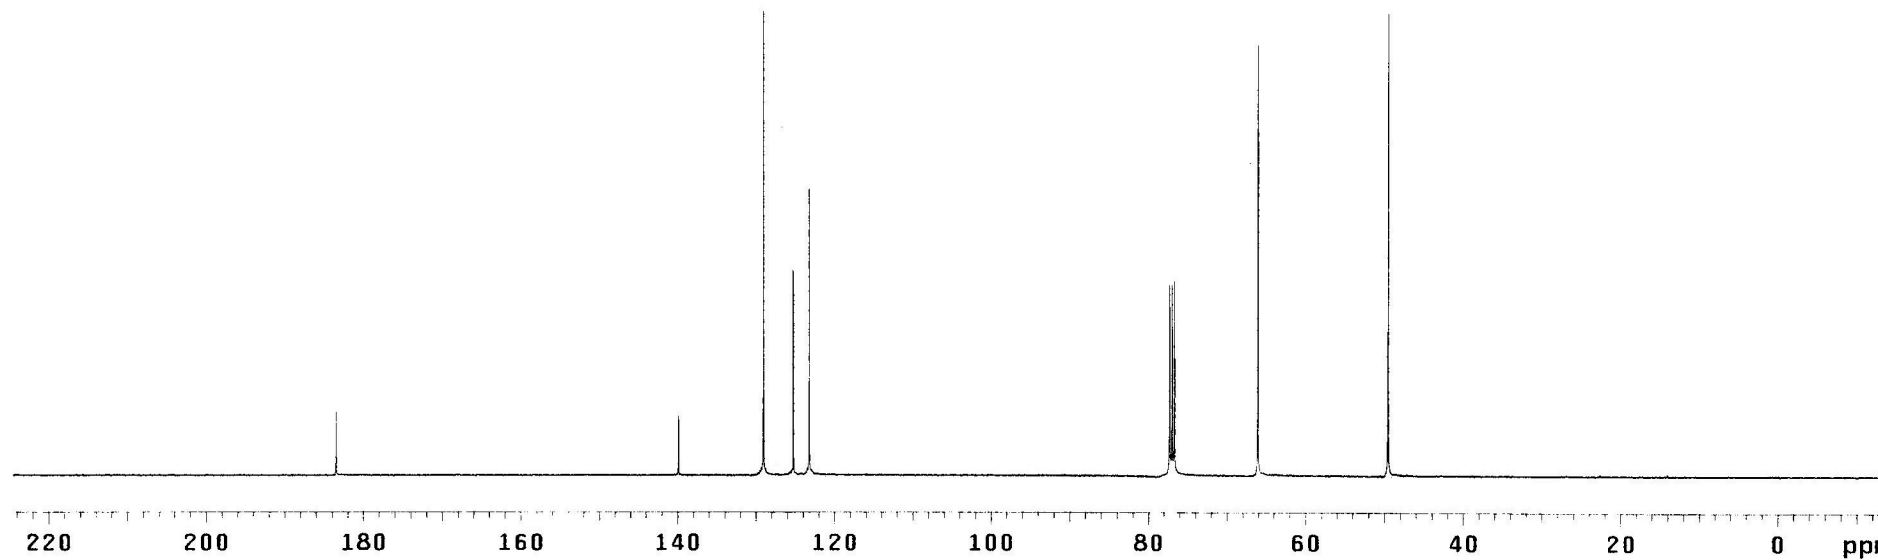

# Std Proton parameters

exp1 s2pul

| SAMPLE              |                | DEC. & VT  |         |
|---------------------|----------------|------------|---------|
| date                | Oct 14 2011    | dfrq       | 100.528 |
| solvent             | CDC13          | dn         | C13     |
| file                | /export/home/~ | dpwr       | 46      |
| cmc/vnmrsys/data/2~ |                | dof        | 0       |
| 0111014_03.fid      |                | dm         | nnn     |
| ACQUISITION         |                | PROCESSING |         |
| sfrq                | 399.756        | dmm        | c       |
| tn                  | H1             | dmf        | 18500   |
| at                  | 2.557          | lb         | 0.10    |
| np                  | 22480          | wtfile     |         |
| sw                  | 4395.6         | proc       | ft      |
| fb                  | not used       | fn         | 65536   |
| bs                  | 4              |            |         |
| tpwr                | 56             | werr       |         |
| pw                  | 7.5            | wexp       | wft     |
| d1                  | 1.000          | wbs        |         |
| tof                 | -60.6          | wnt        |         |
| nt                  | 32             |            |         |
| ct                  | 32             |            |         |
| alock               | y              |            |         |
| gain                | not used       |            |         |
| FLAGS               |                |            |         |
| il                  | n              |            |         |
| in                  | n              |            |         |
| dp                  | y              |            |         |
| DISPLAY             |                |            |         |
| sp                  | -206.4         |            |         |
| wp                  | 4395.5         |            |         |
| vs                  | 266            |            |         |
| sc                  | 0              |            |         |
| wc                  | 240            |            |         |
| hzmm                | 18.31          |            |         |
| is                  | 198.58         |            |         |
| rfl                 | 3100.7         |            |         |
| rfp                 | 2894.2         |            |         |
| th                  | 14             |            |         |
| ins                 | 100.000        |            |         |
| ai                  | cdc ph         |            |         |

7.240

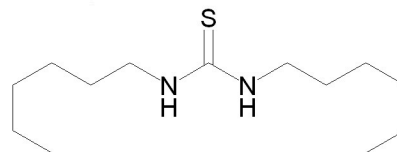

3.363

1.652  
1.587  
1.568  
1.550  
1.531  
1.543  
1.339  
1.328  
1.321  
1.313  
1.308  
1.304  
1.283  
1.274  
1.268  
1.258  
1.248  
1.243  
1.226  
0.874  
0.857  
0.839  
0.828

10 9 8 7 6 5 4 3 2 1 0 ppm

7.17

14.13

14.77  
43.33  
20.60

Std Carbon experiment  
exp1 Carbon

SAMPLE  
date Nov 7 2011 temp  
solvent CDCl3 gain  
file /export/home/~ spin  
cmc/vnmrsys/data/2~ hst  
0111108\_01.fid pw90  
ACQUISITION alfa

SPECIAL  
not used  
20  
20  
0.008  
15.900  
10.000

sw 24096.4  
at 1.300 il  
np 62674 in  
fb 13200 dp  
bs 5000 hs  
dl 1.000  
nt 10000 lb  
ct 10000 fn

FLAGS  
n  
n  
y  
nn

PROCESSING  
1.00  
65536

TRANSMITTER  
tn C13 sp  
sfrq 100.529 wp  
tof 1027.4 rfl  
tpwr 56 rfp  
pw 7.950 rp

DISPLAY  
-1550.7  
24095.7  
9291.3  
7739.9  
69.5  
-236.1

DECOUPLER  
dn H1  
dof 0 wc  
dm yyy sc  
dmm w vs  
dpwr 39 th  
dmf 9500 ai

PLOT  
250  
0  
228  
3

cdc ph

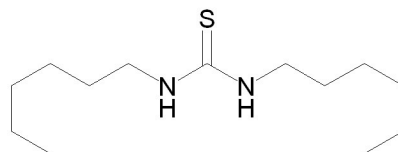

77.315  
77.227  
77.000  
76.905  
76.678  
76.590

44.145

31.057  
28.687  
26.192  
22.103

13.536

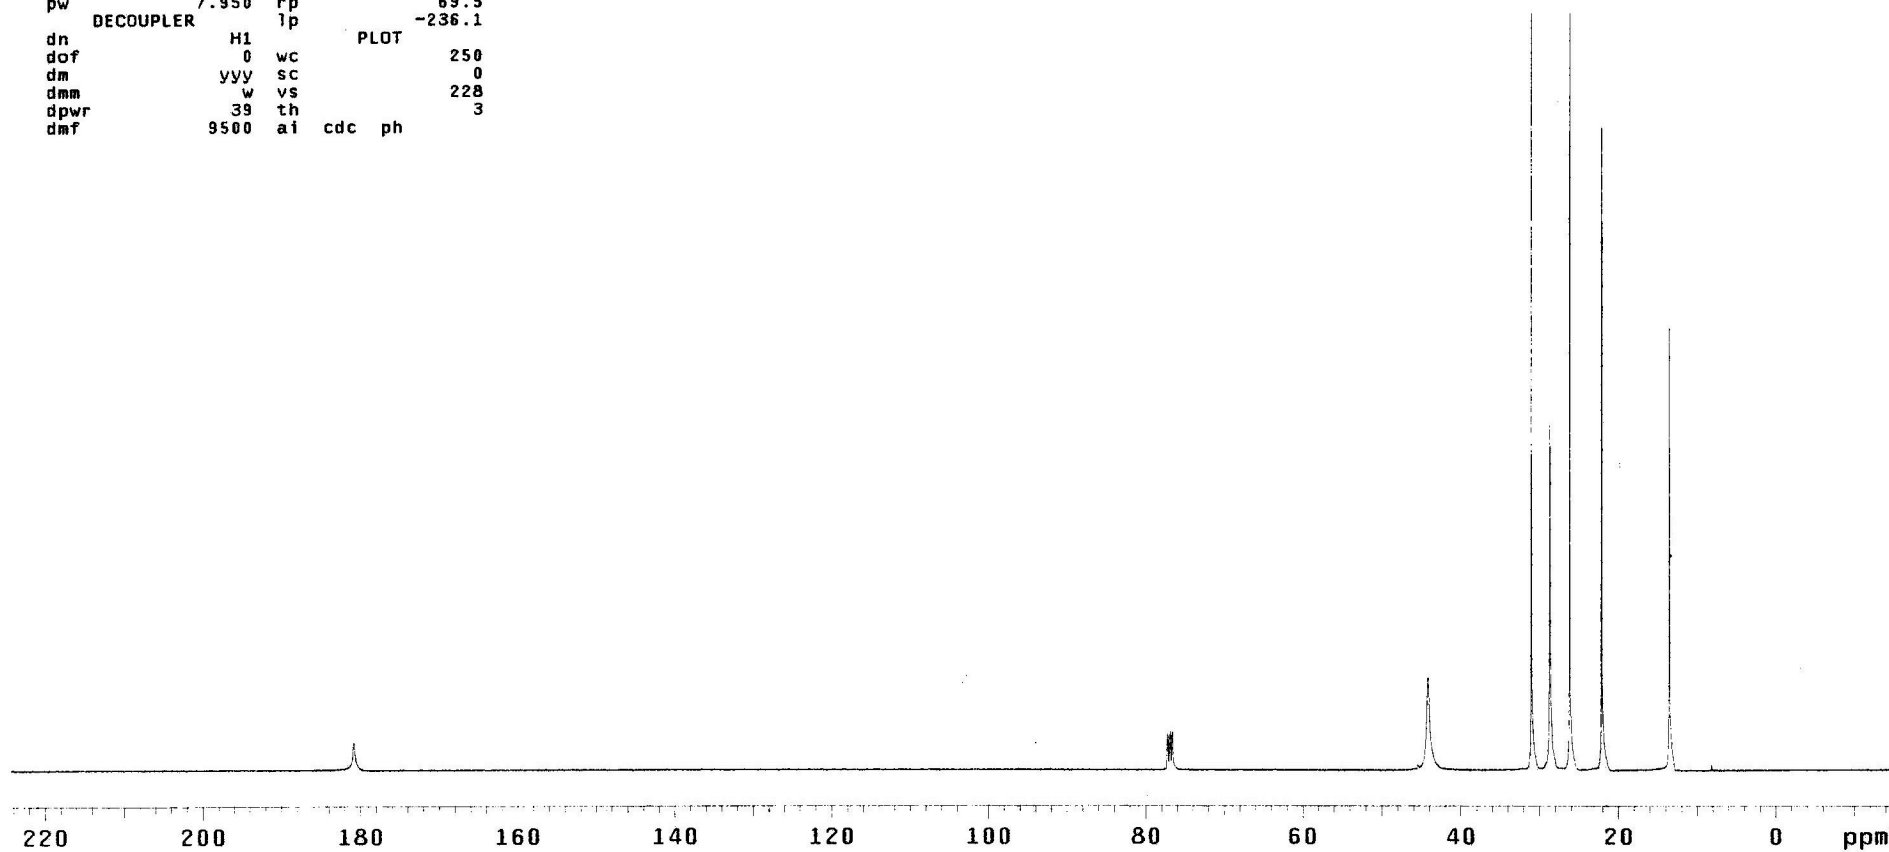

# Std Proton parameters

exp1 s2pu1

| SAMPLE              |                | DEC. & VT  |         |
|---------------------|----------------|------------|---------|
| date                | Nov 24 2011    | dfrq       | 100.528 |
| solvent             | CDC13          | dn         | C13     |
| file                | /export/home/~ | dpwr       | 46      |
| cmc/vnmrsys/data/2~ | 0111124_03.fid | dof        | 0       |
| ACQUISITION         |                | dm         | nnn     |
| sfrq                | 399.756        | dmm        | c       |
| tn                  | H1             | dmf        | 18500   |
| at                  | 2.557          | PROCESSING |         |
| np                  | 22480          | lb         | 0.10    |
| sw                  | 4395.6         | wtfile     |         |
| fb                  | not used       | proc       | ft      |
| bs                  | 4              | fn         | 65536   |
| tpwr                | 56             | werr       |         |
| pw                  | 7.5            | wexp       | wft     |
| d1                  | 1.000          | wbs        |         |
| tof                 | -60.6          | wnt        |         |
| nt                  | 32             |            |         |
| ct                  | 20             |            |         |
| alock               | y              |            |         |
| gain                | not used       |            |         |
| FLAGS               |                |            |         |
| il                  | n              |            |         |
| in                  | n              |            |         |
| dp                  | y              |            |         |
| DISPLAY             |                |            |         |
| sp                  | -206.5         |            |         |
| wp                  | 4395.5         |            |         |
| vs                  | 104            |            |         |
| sc                  | 0              |            |         |
| wc                  | 240            |            |         |
| hzmm                | 18.31          |            |         |
| is                  | 188.69         |            |         |
| rfl                 | 3100.9         |            |         |
| rfp                 | 2894.2         |            |         |
| th                  | 3              |            |         |
| ins                 | 100.000        |            |         |
| ai                  | cdc ph         |            |         |

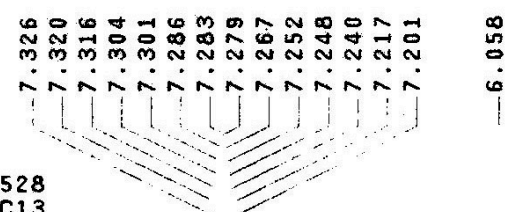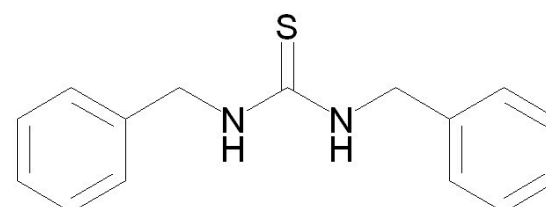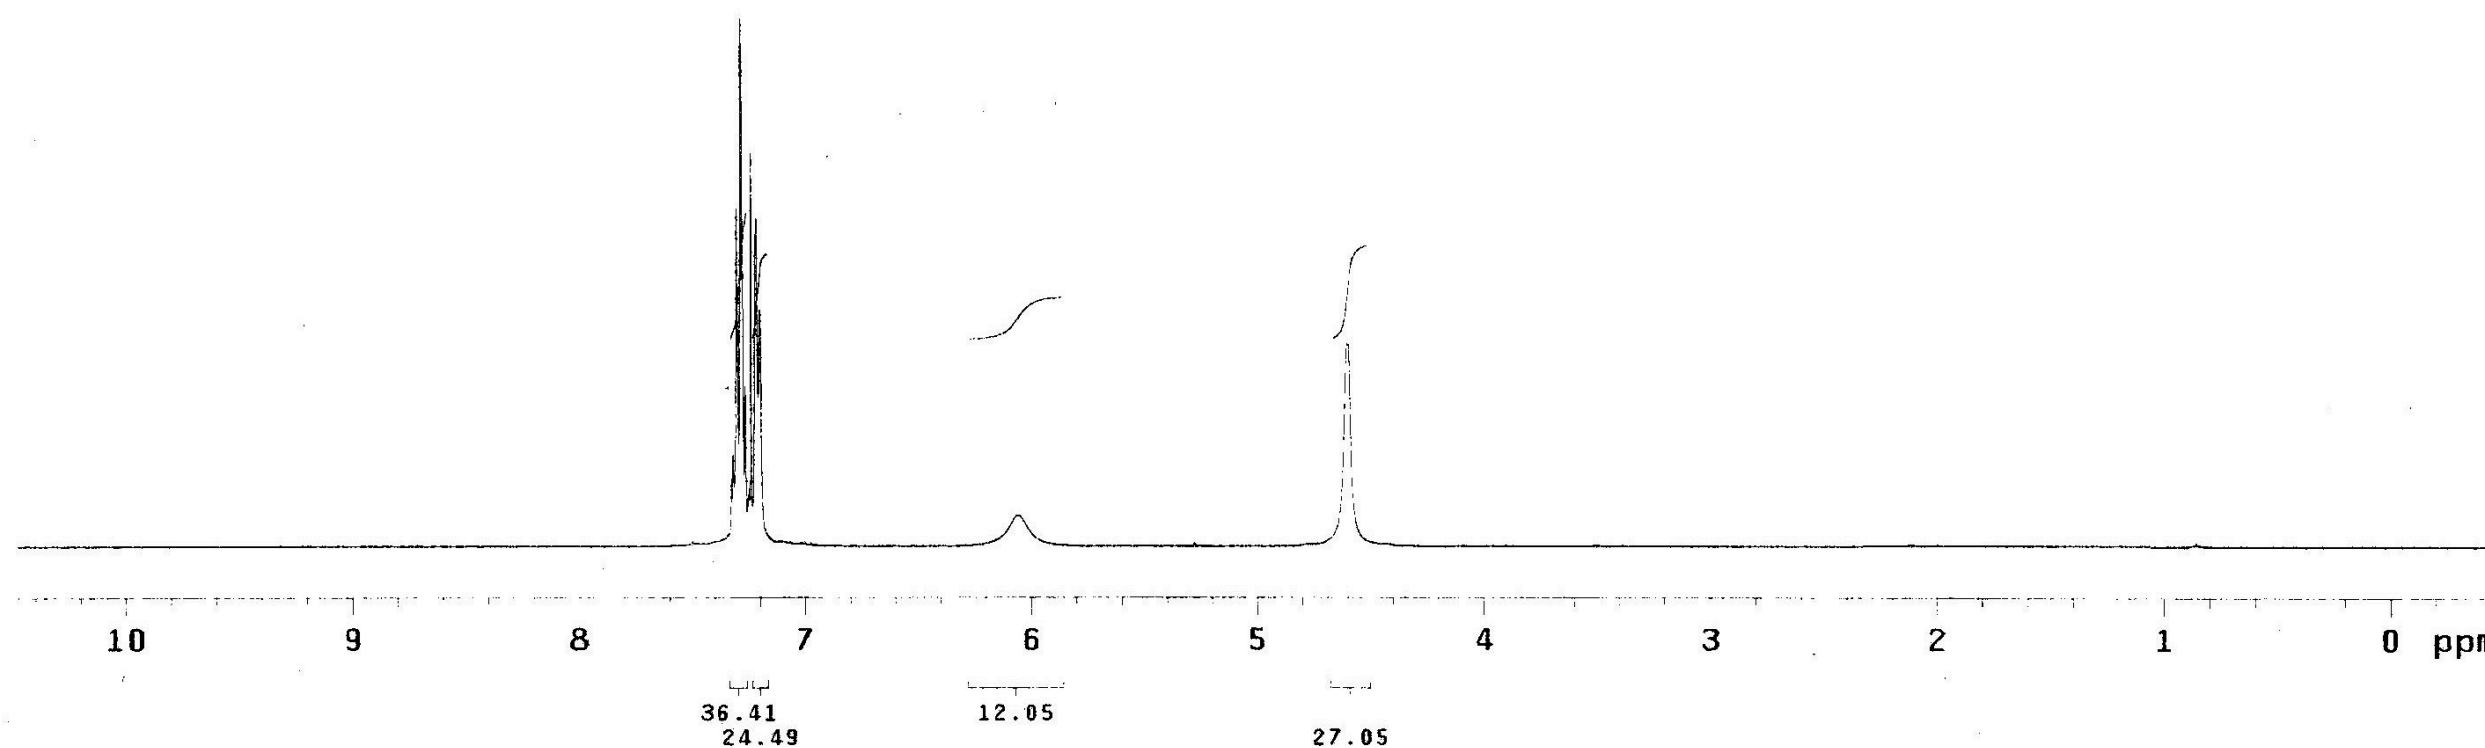

```

Std Carbon experiment
exp1 Carbon
SAMPLE
date Nov 3 2011 temp
solvent CDCl3 gain 20
file /export/home/~ spin 20
cmr/vnmr/sys/data/2~ hst 0.008
0111104_01.fid pw90 15.900
ACQUISITION alfa 10.000
sw 24096.4
at 1.300 t1
np 62674 in
fb 13200 dp
bs 7500 hs
dl 1.000
nt 15000 lb
ct 15000 fn
TRANSMITTER C13 sp
sfrq 100.529 wp
tof 1027.4 rfl
tpwr 56 rfp
pw 7.950 rp
DECOUPLER H1 lp
dn 0
dof 0
dm yyv sc
dmm w vs
dpwr 39 th
dmf 9500 ai cdc ph
SPECIAL not used
FLAGS n
nn
PROCESSING 1.00
65536
DISPLAY -1520.5
24095.7
9261.2
7739.9
69.3
-275.6
PLOT 250
0
784
3

```

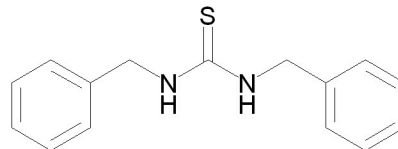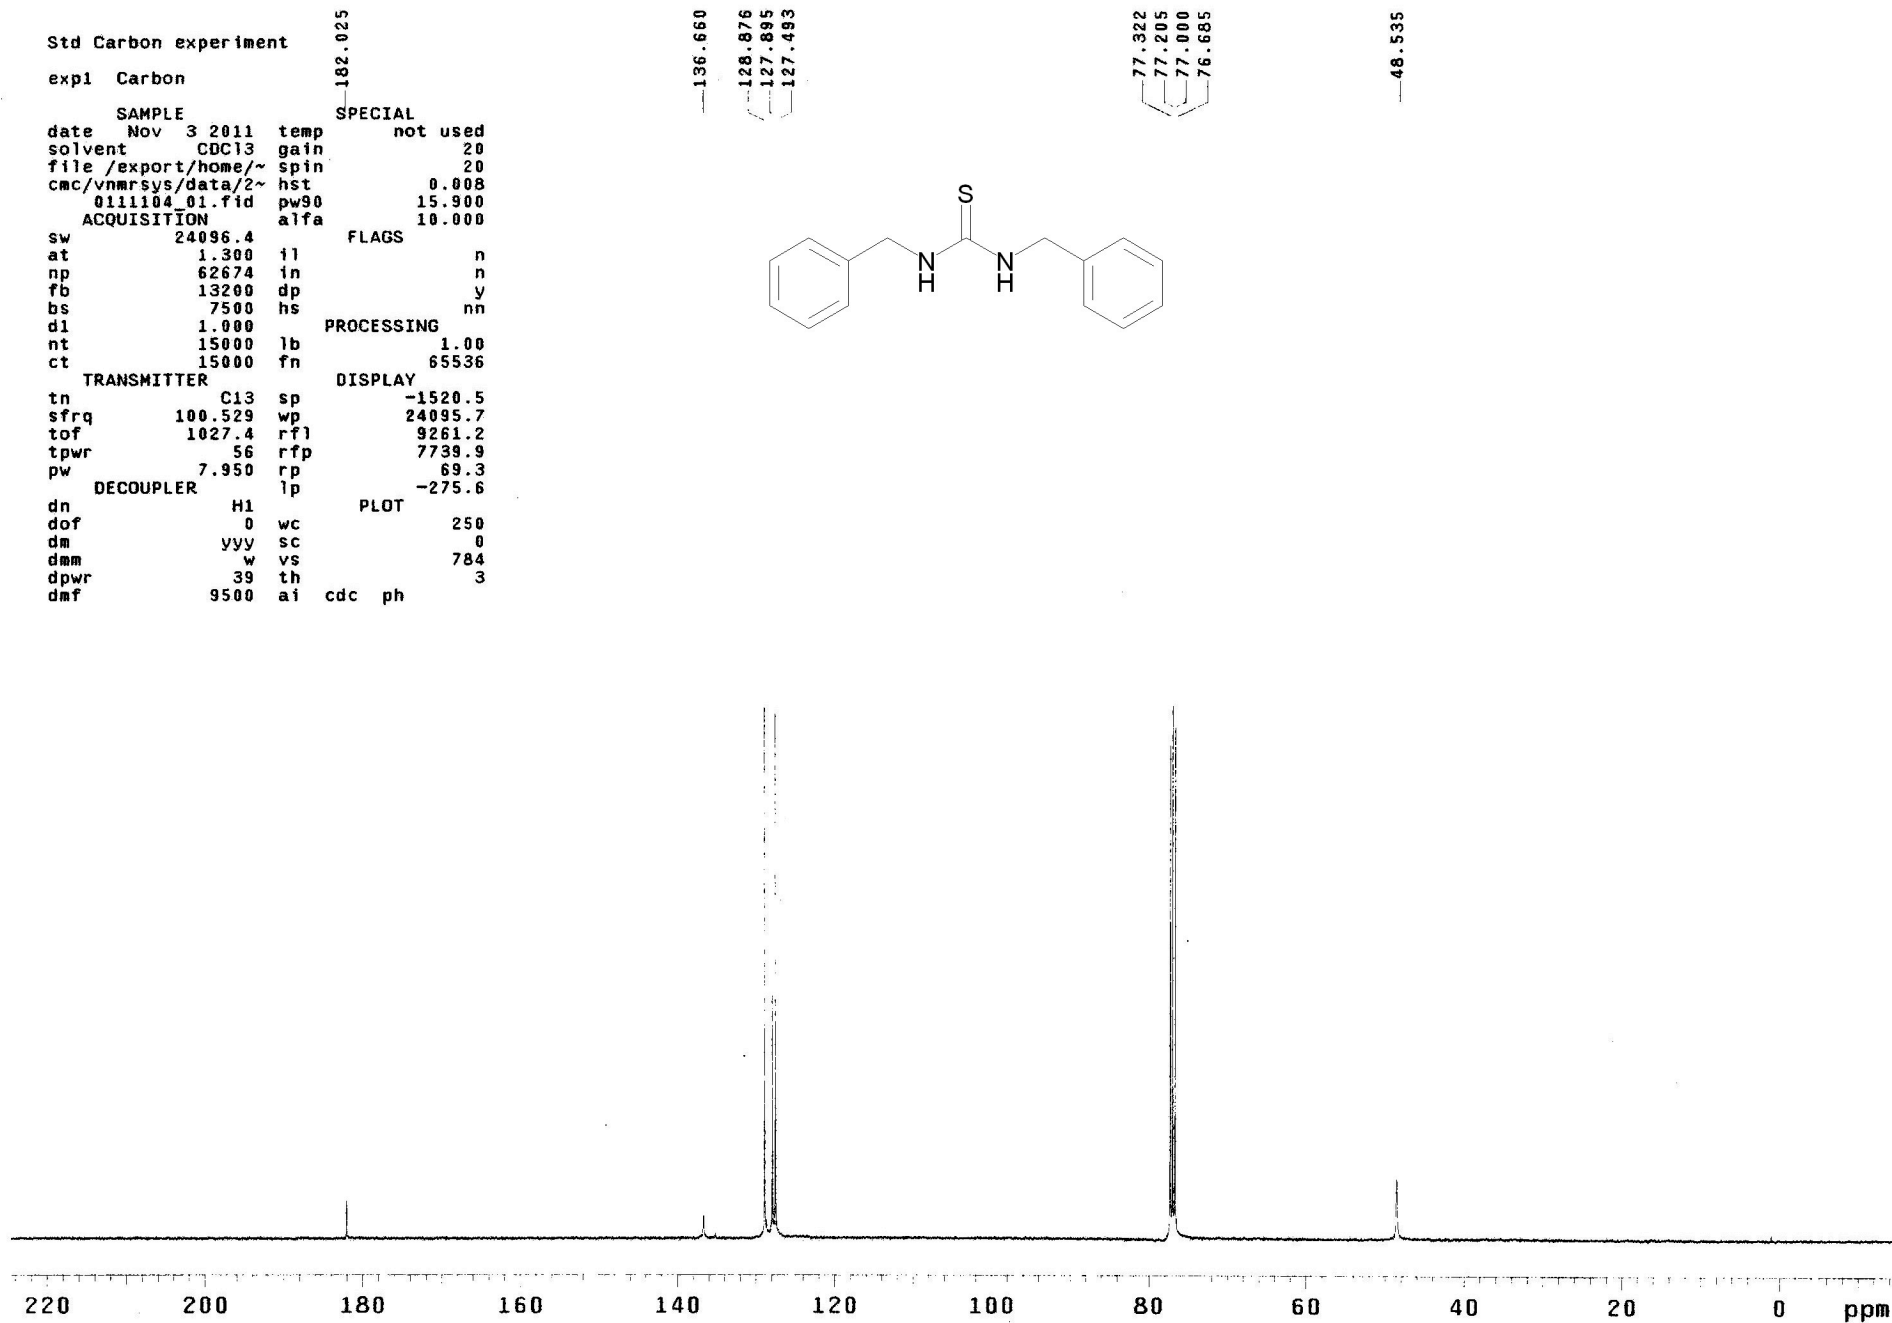

# Std Proton parameters

exp1 s2pul

SAMPLE DEC. & VT  
date Sep 20 2012 dfrq 100.528  
solvent CDCl3 dn C13  
file exp dpwr 46  
ACQUISITION dof 0  
sfrq 399.756 dm nnn  
tn H1 dmm c  
at 2.557 dmf 18500  
np 22480 PROCESSING  
sw 4395.6 lb 0.10  
fb not used wtfile  
bs 4 proc ft  
tpwr 56 fn 65536  
pw 7.5  
d1 1.000 werr  
tof -60.6 wexp wft  
nt 32 wbs  
ct 32 wnt  
alock y  
gain not used  
FLAGS  
il n  
in n  
dp y  
DISPLAY  
sp -206.9  
wp 4395.5  
vs 89  
sc 0  
wc 240  
hzmm 18.31  
is 339.51  
rfl 3101.3  
rfp 2894.2  
th 1  
ins 100.000  
nm cdc ph

7.998  
7.911  
7.410  
7.390  
7.373  
7.368  
7.351  
7.279  
7.277  
7.260  
7.250  
7.240

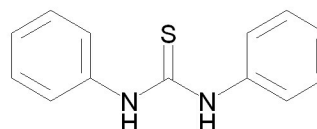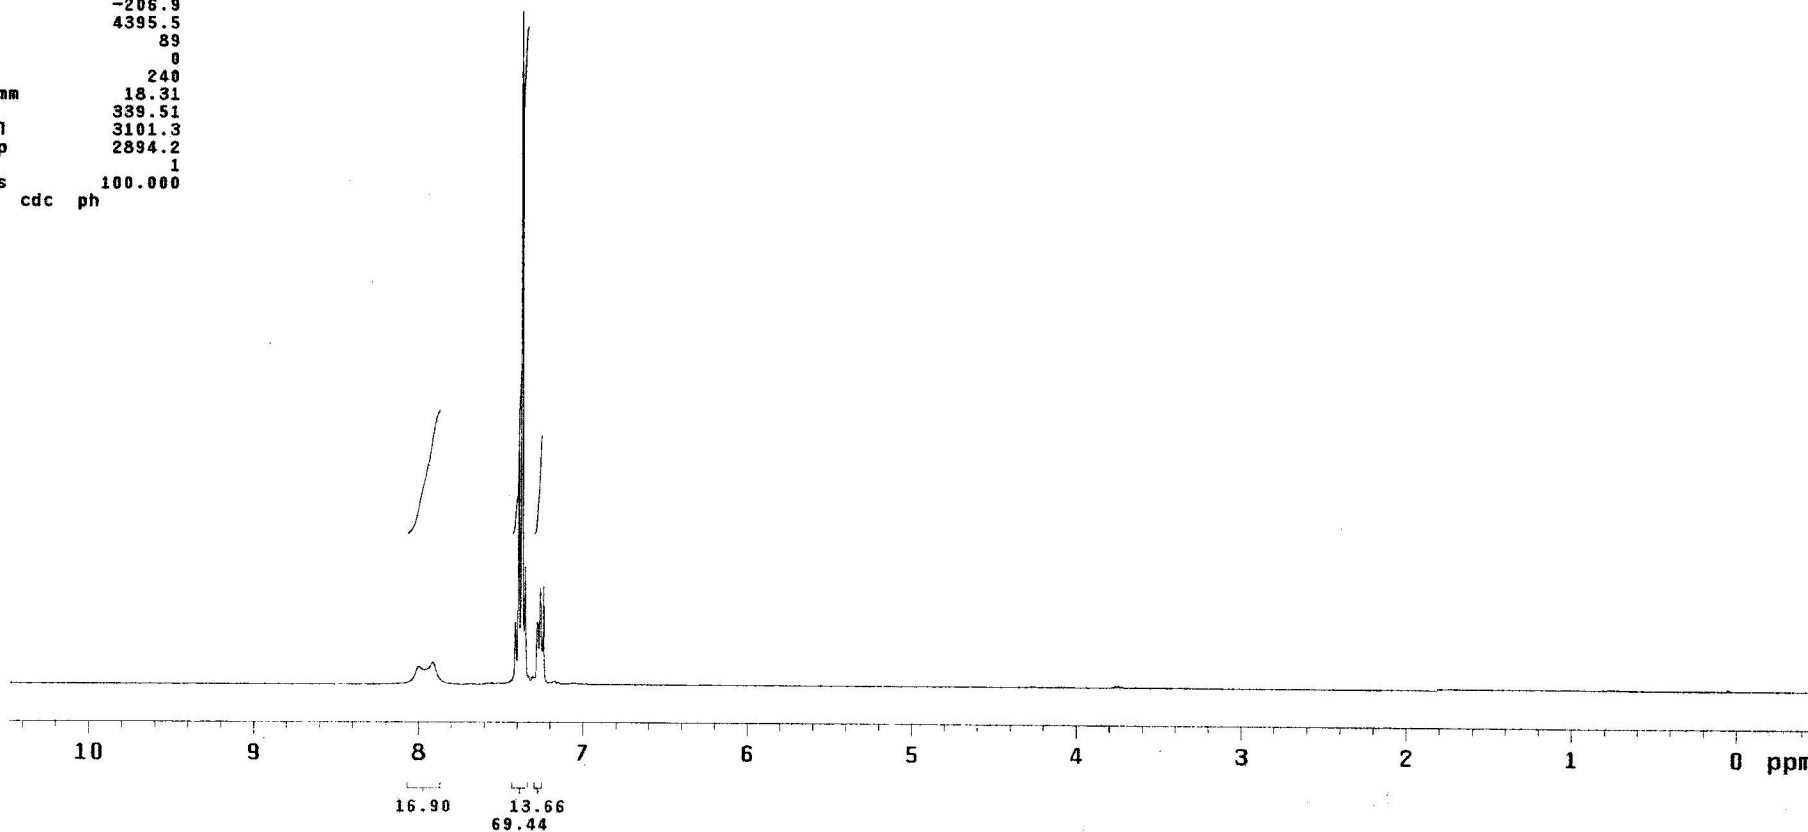

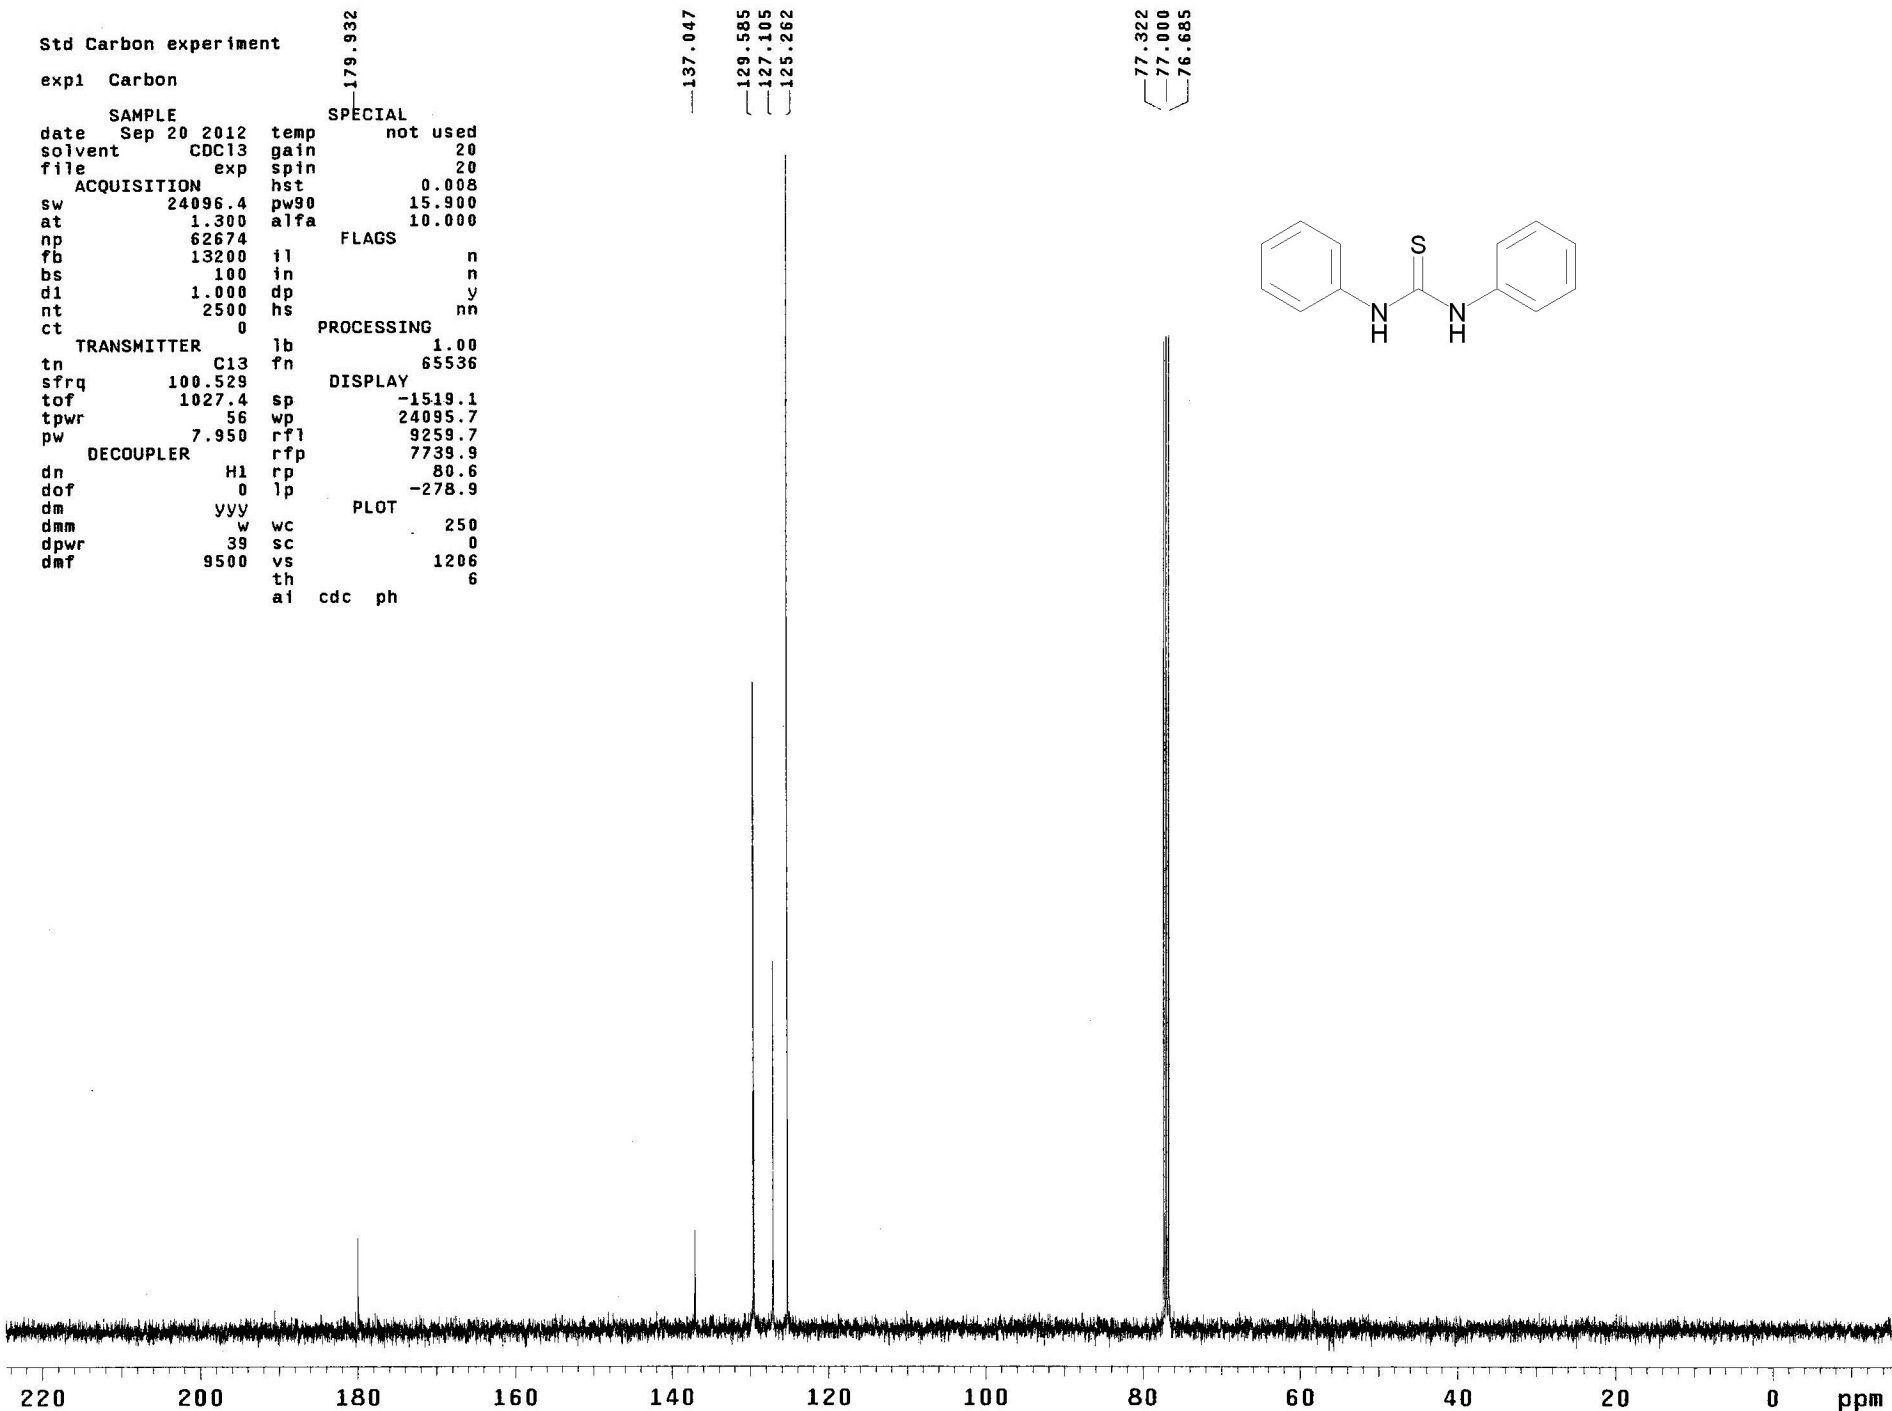

Std Proton parameters

exp1 s2pul

SAMPLE DEC. & VT  
date Sep 18 2012 dfrq 100.528  
solvent CDCl3 dn C13  
file /export/home/~ dpwr 46  
cmc/vnmr/sys/data/2~ dof 0  
0120918\_06.fid dm nnn  
ACQUISITION dmm c  
sfrq 399.756 dmf 18500  
tn H1 PROCESSING  
at 2.556 lb 0.10  
np 22466 wtfile  
sw 4395.6 proc ft  
fb not used fn 65536  
bs 4  
tpwr 56 werr  
pw 7.5 wexp wft  
d1 1.000 wbs  
tof -60.6 wnt  
nt 32  
ct 32  
alock y  
gain not used  
FLAGS  
il n  
in n  
dp y  
DISPLAY  
sp -230.2  
wp 4395.5  
vs 52  
sc 0  
wc 240  
hzmm 18.31  
is 911.17  
rfl 230.3  
rfp 0  
th 16  
ins 100.000  
ai cdc ph

7.175  
7.154  
7.117  
7.097

2.263

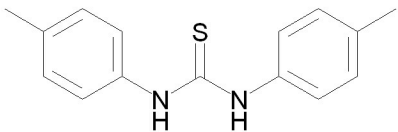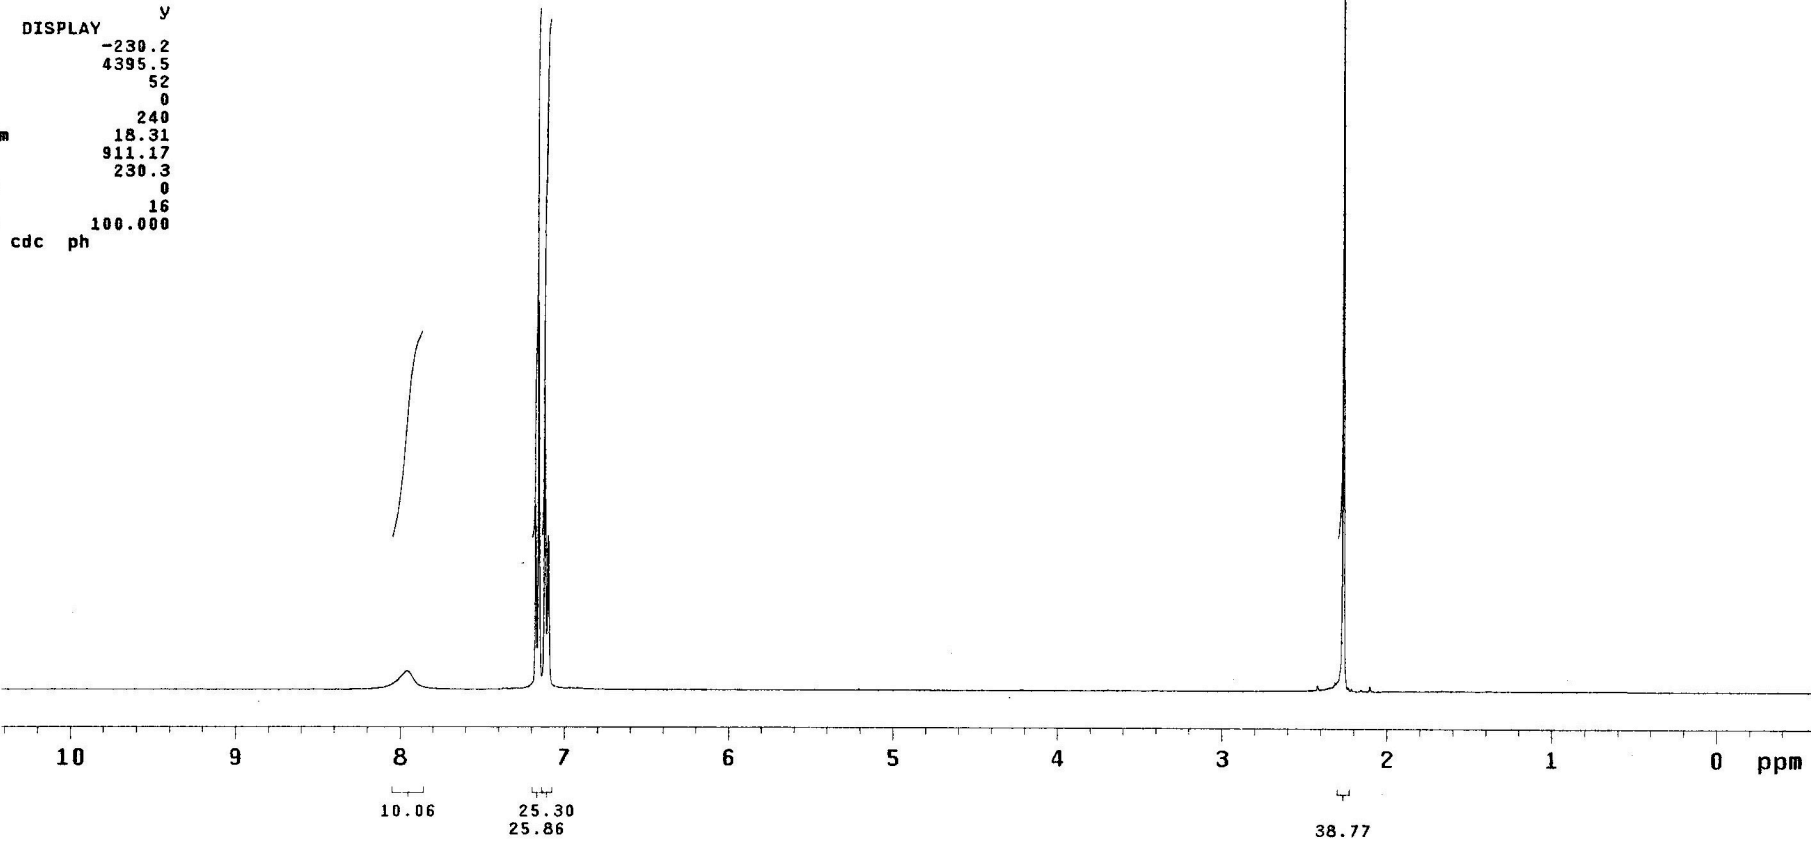

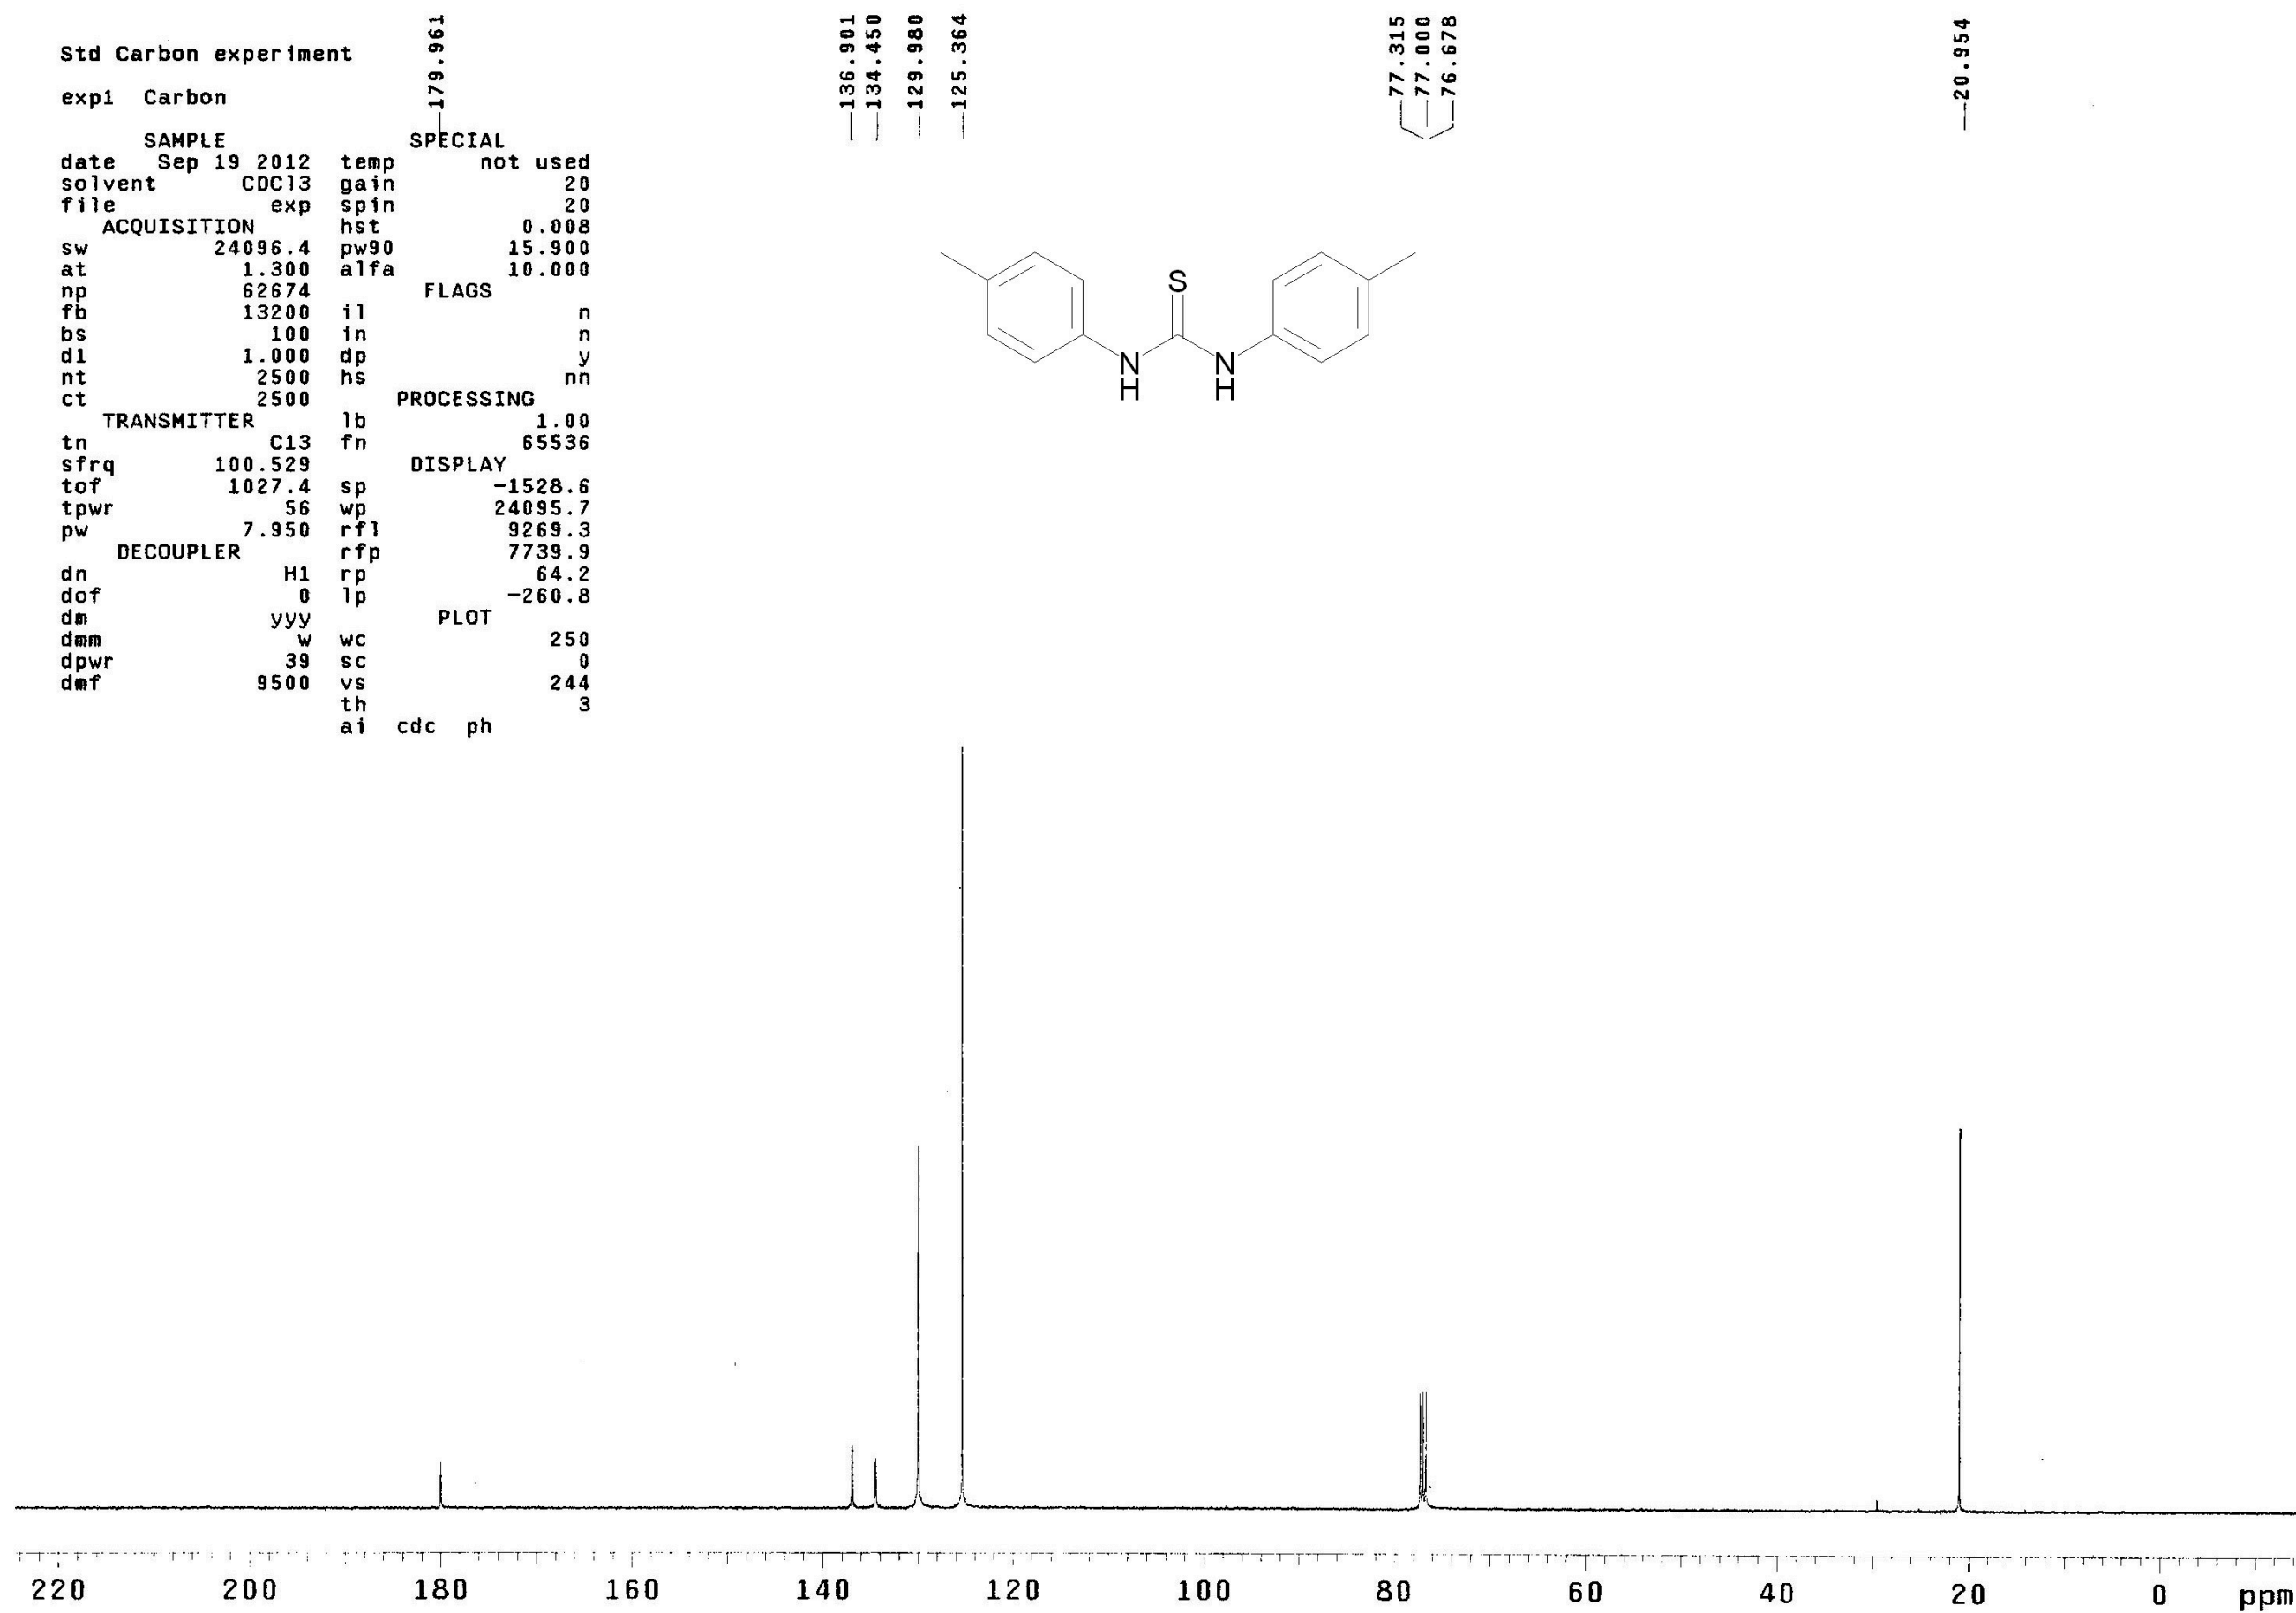

# Std Proton parameters

exp1 s2pul

| SAMPLE              |                | DEC. & VT  |         |
|---------------------|----------------|------------|---------|
| date                | Sep 18 2012    | dfrq       | 100.528 |
| solvent             | CDCl3          | dn         | C13     |
| file                | /export/home/~ | dpwr       | 46      |
| cmc/vnmrsys/data/2~ |                | dof        | 0       |
| 0120918_09.fid      |                | dm         | nnn     |
| ACQUISITION         |                | PROCESSING |         |
| sfrq                | 399.756        | dmm        | c       |
| tn                  | H1             | dmf        | 18500   |
| at                  | 2.557          | lb         | 0.10    |
| np                  | 22480          | wtfile     |         |
| sw                  | 4395.6         | proc       | ft      |
| fb                  | not used       | fn         | 65536   |
| bs                  | 4              |            |         |
| tpwr                | 56             | werr       |         |
| pw                  | 7.5            | wexp       | wft     |
| dl                  | 1.000          | wbs        |         |
| tof                 | -60.6          | wnt        |         |
| nt                  | 32             |            |         |
| ct                  | 32             |            |         |
| alock               | y              |            |         |
| gain                | not used       |            |         |
| FLAGS               |                |            |         |
| il                  | n              |            |         |
| in                  | n              |            |         |
| dp                  | y              |            |         |
| DISPLAY             |                |            |         |
| sp                  | -225.5         |            |         |
| wp                  | 4395.5         |            |         |
| vs                  | 109            |            |         |
| sc                  | 0              |            |         |
| wc                  | 240            |            |         |
| hzmm                | 18.31          |            |         |
| is                  | 953.67         |            |         |
| rfl                 | 225.6          |            |         |
| rfp                 | 0              |            |         |
| th                  | 17             |            |         |
| ins                 | 100.000        |            |         |
| ai                  | cdc ph         |            |         |

7.195  
7.193  
7.190  
7.178  
7.173  
6.841  
6.819

3.979  
3.961  
3.944  
3.926

1.358  
1.341  
1.323

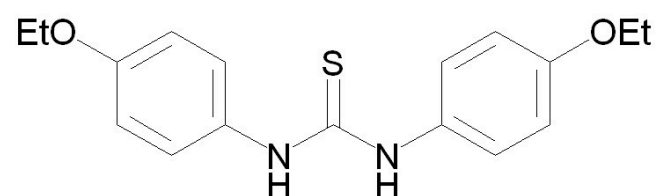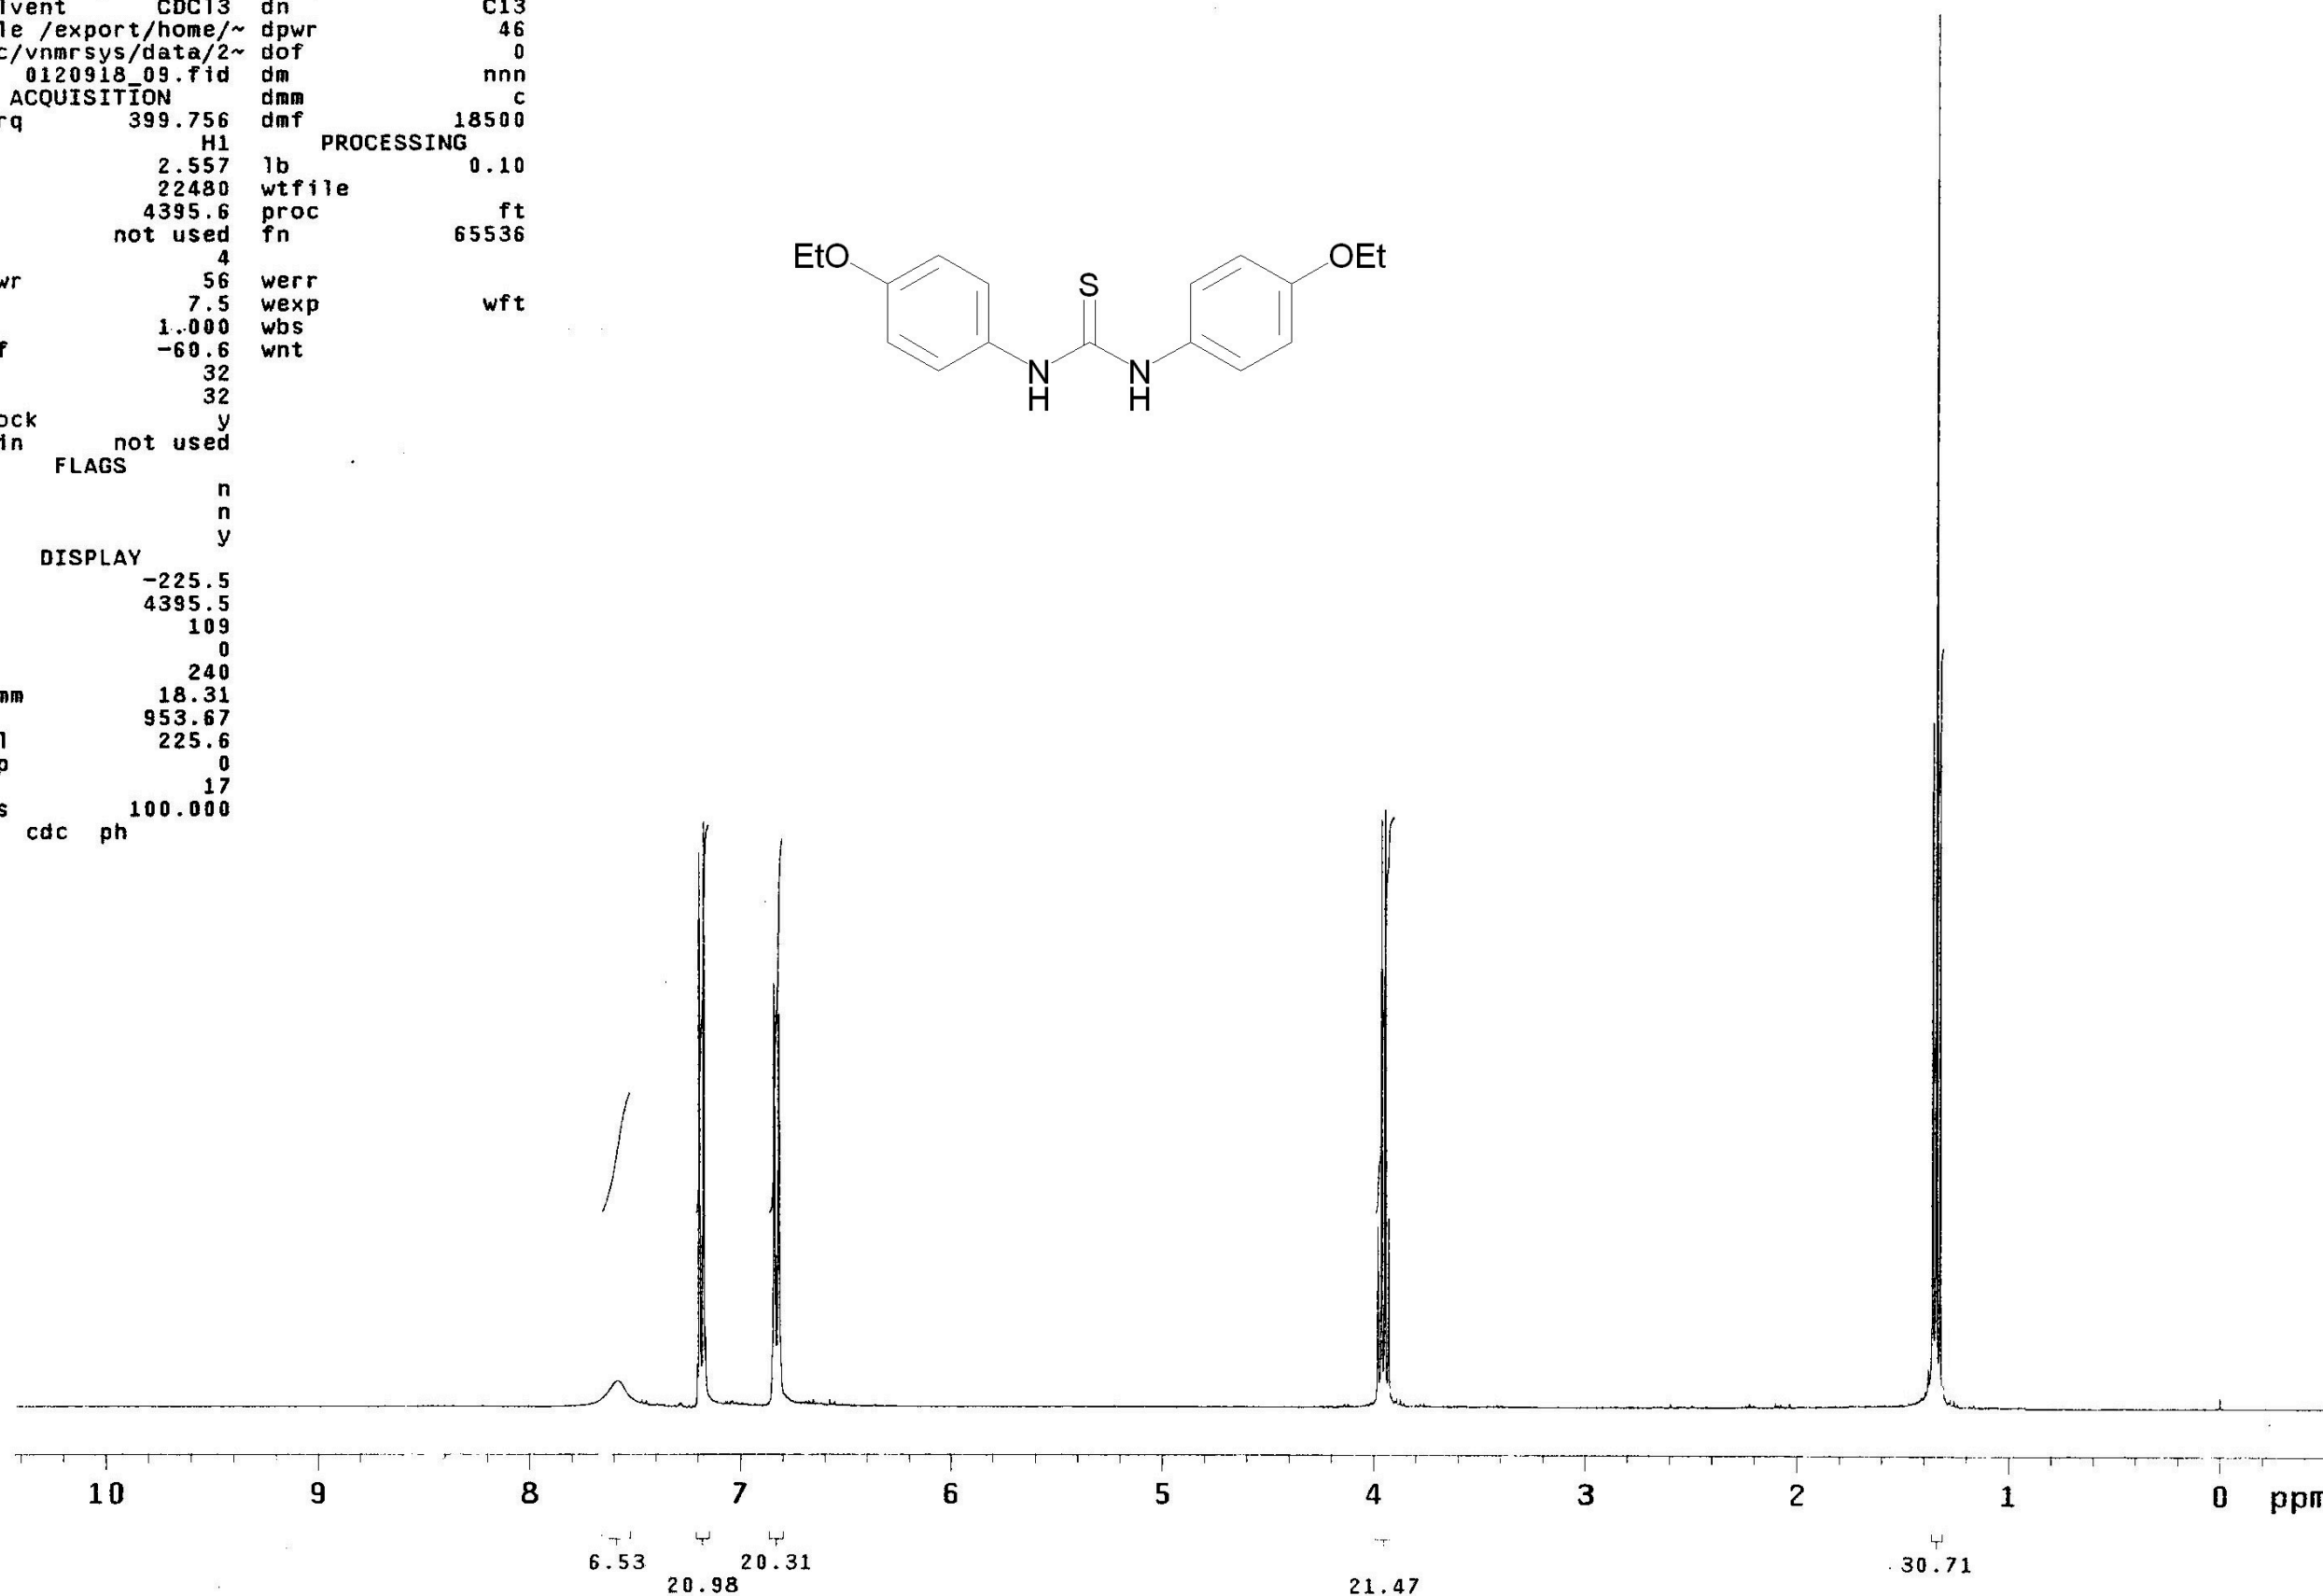

Std Carbon experiment

|             |             |            |          |
|-------------|-------------|------------|----------|
| exp1        | Carbon      |            |          |
| SAMPLE      |             | SPECIAL    |          |
| date        | Sep 19 2012 | temp       | not used |
| solvent     | CDCl3       | gain       | 20       |
| file        | exp         | spin       | 20       |
| ACQUISITION |             | hst        | 0.008    |
| sw          | 24096.4     | pw90       | 15.900   |
| at          | 1.300       | alfa       | 10.000   |
| np          | 62674       | FLAGS      |          |
| fb          | 13200       | il         | n        |
| bs          | 100         | in         | n        |
| d1          | 1.000       | dp         | y        |
| nt          | 2500        | hs         | nn       |
| ct          | 1600        | PROCESSING |          |
| TRANSMITTER |             | lb         | 1.00     |
| tn          | C13         | fn         | 65536    |
| sfrq        |             | DISPLAY    |          |
| to          | 100.529     | sp         | -1520.5  |
| tpwr        | 56          | wp         | 24095.7  |
| pw          | 7.950       | rfl        | 9261.2   |
| DECOUPLER   |             | rfl        | 7739.9   |
| dn          | H1          | rp         | 60.8     |
| dof         | 0           | lp         | -219.1   |
| dm          |             | PLOT       |          |
| dmm         | w           | wc         | 250      |
| dpwr        | 39          | sc         | 0        |
| dmf         | 9500        | vs         | 986      |
|             |             | th         | 8        |
|             |             | ai         | cdc ph   |

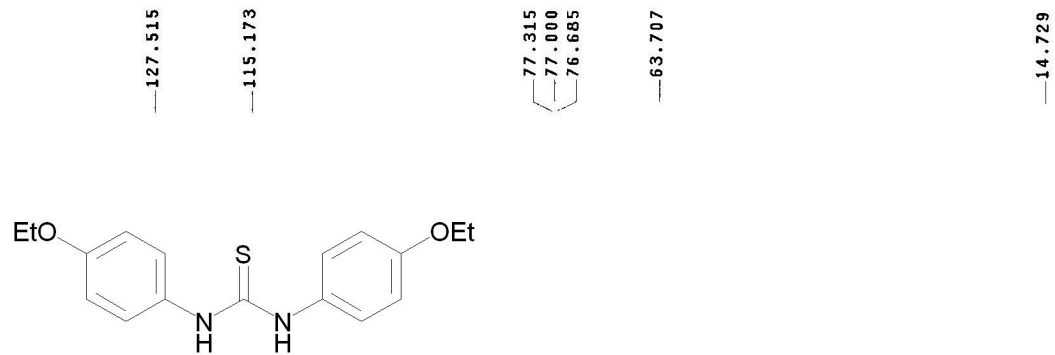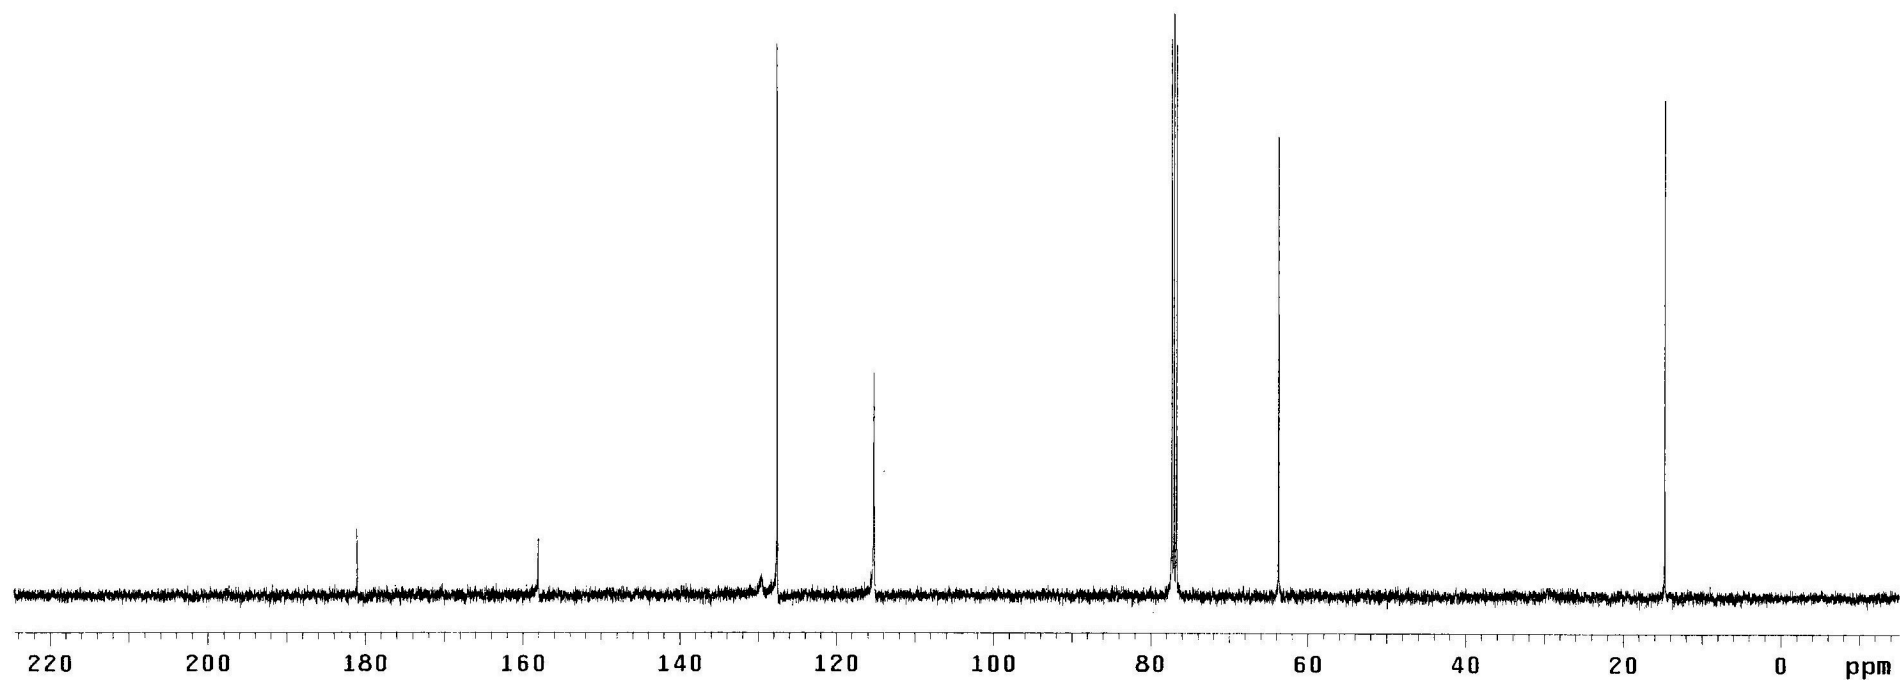

Std Proton parameters

exp1 s2pu1

SAMPLE DEC. & VT

date Sep 25 2012 dfrq 100.528

solvent CDCl3 dn C13

file exp dpwr 46

ACQUISITION dof 0

sfrq 399.756 dm nnn

tn H1 dmm c

at 2.557 dmf 18500

np 22480 PROCESSING

sw 4395.6 lb 0.10

fb not used wtfile

bs 4 proc ft

tpwr 56 fn 65536

pw 7.5

dl 1.000 werr

tof -60.6 wexp

nt 32 wbs

ct 32 wnt

alock y

gain not used

FLAGS

il n

in n

dp y

DISPLAY

sp -206.4

wp 4395.5

vs 200

sc 0

wc 240

hzmm 18.31

is 3814.70

rfl 3100.7

rfp 2894.2

th 2

ins 100.000

nm cdc ph

8.248  
7.695  
7.688  
7.671  
7.666  
7.240  
7.217

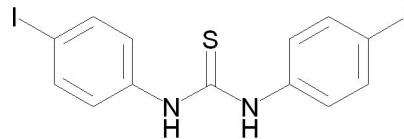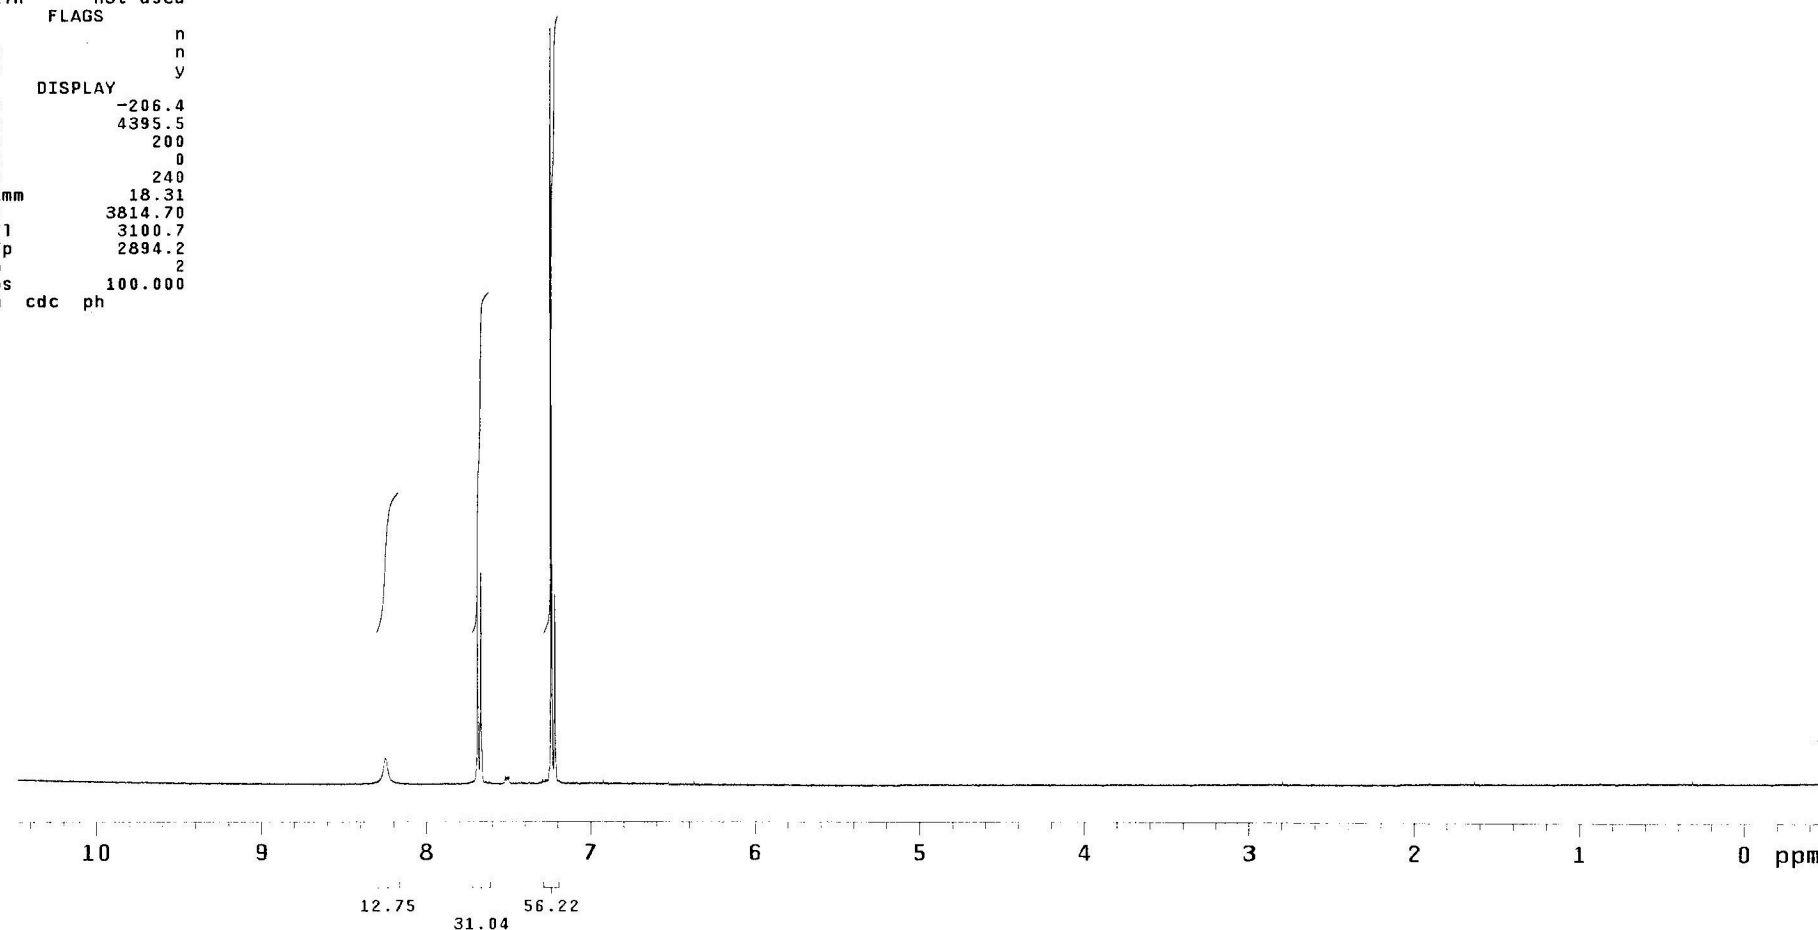

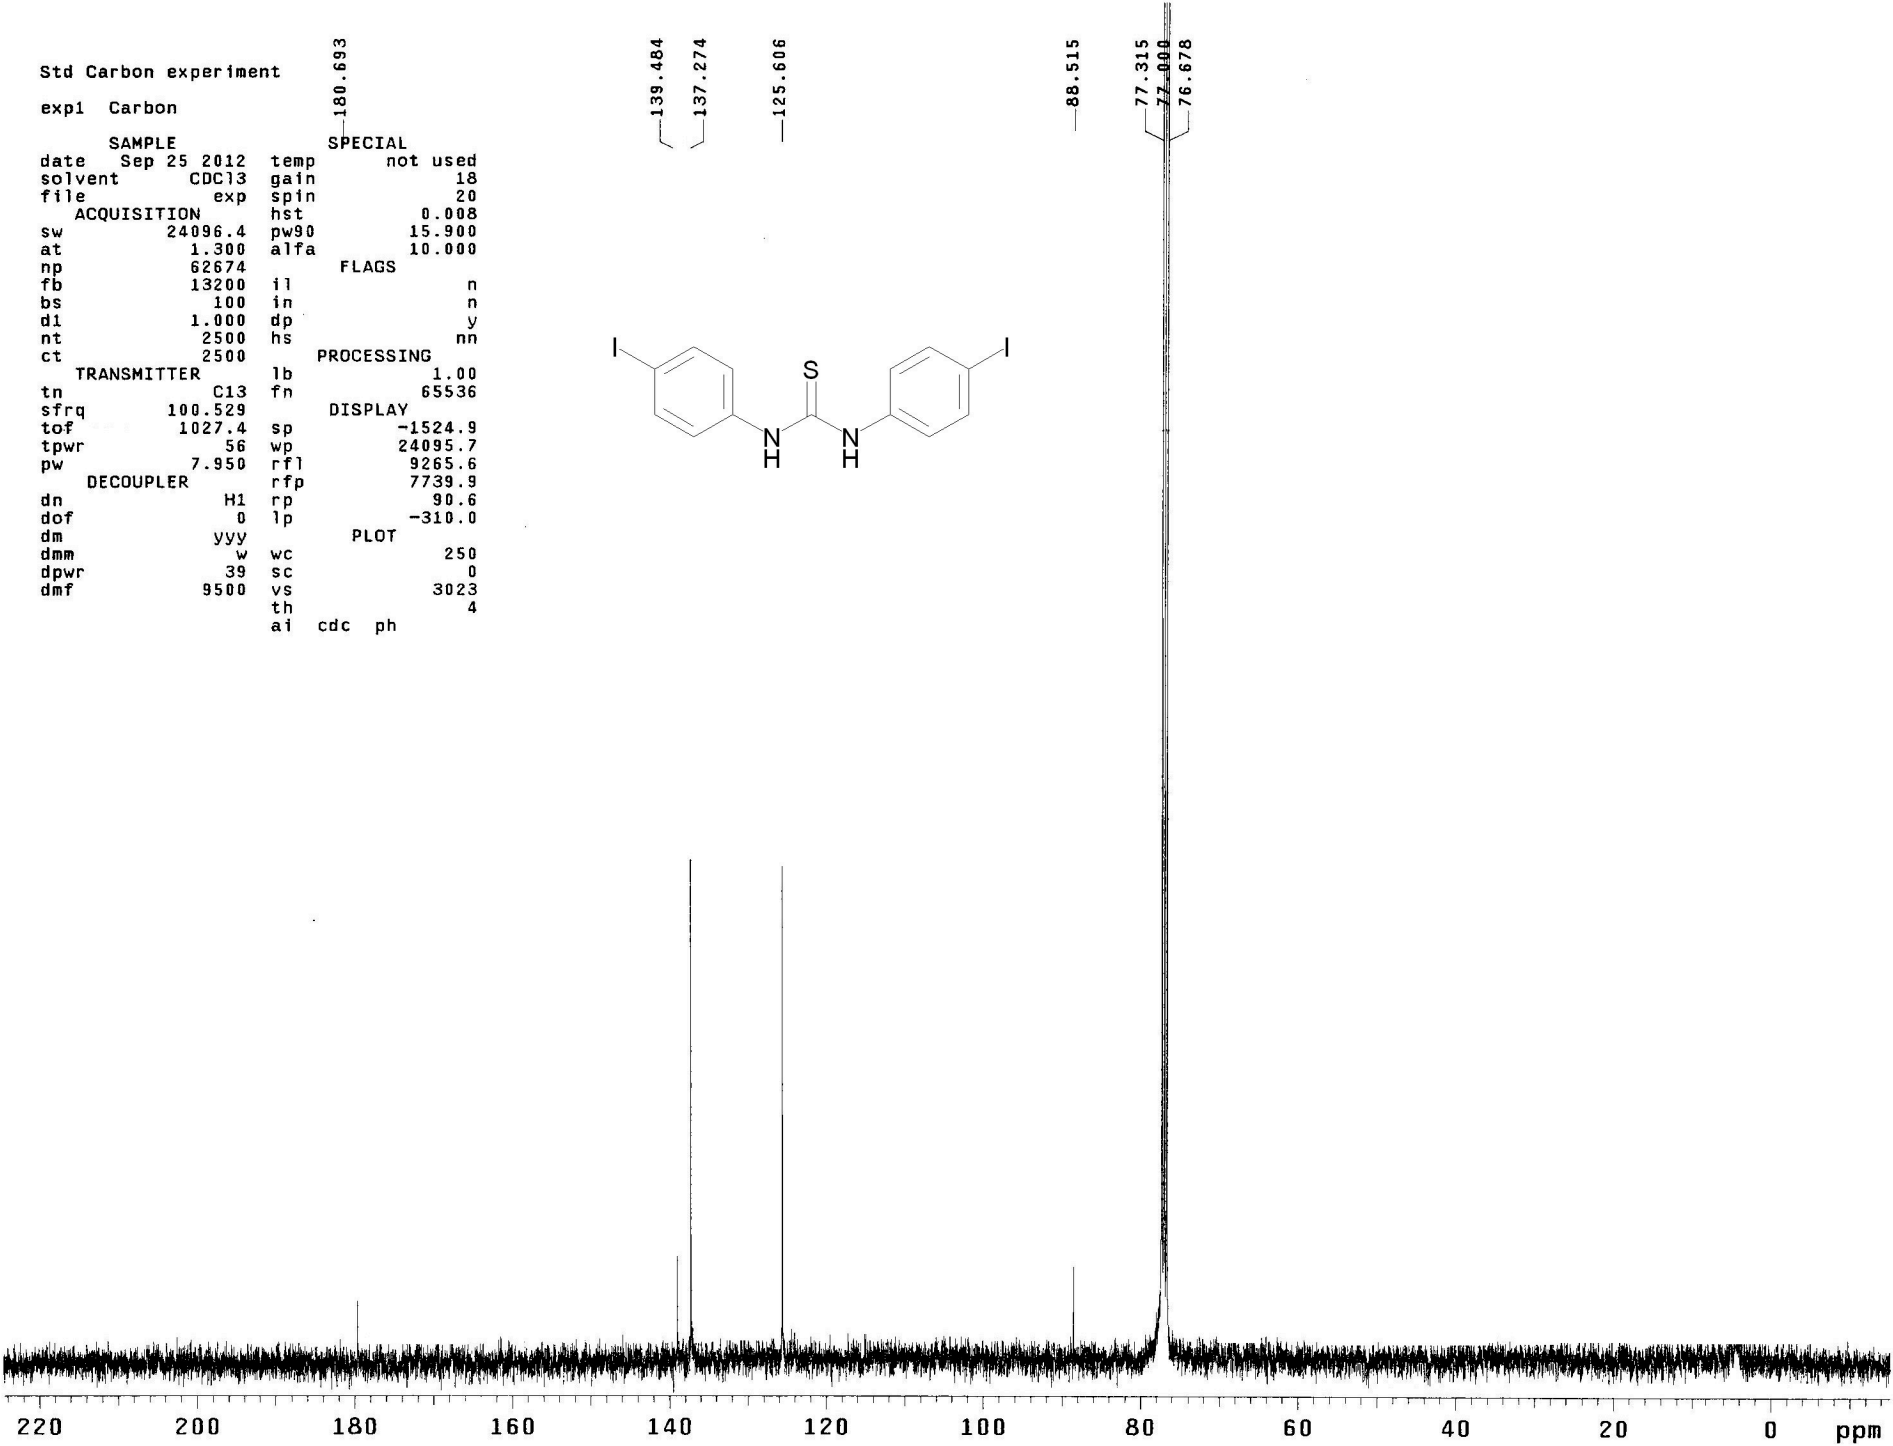

# Std Proton parameters

exp1 s2pul

SAMPLE  
date Aug 17 2011  
solvent CDCl3  
file exp  
ACQUISITION  
sfrq 399.756  
tn H1  
at 2.557  
np 22480  
sw 4395.6  
fb not used  
bs 4  
tpwr 56  
pw 7.5  
dl 1.000  
tof -60.6  
nt 32  
ct 20  
alock y  
gain not used  
FLAGS  
il n  
in n  
dp y  
DISPLAY  
sp -206.6  
wp 4395.5  
vs 75  
sc 0  
wc 240  
hzmm 18.31  
is 1017.57  
rf1 3101.0  
rfp 2894.2  
th 5  
ins 100.000  
nm cdc ph

DE & VT  
dfrq 100.528  
dn C13  
dpwr 46  
dof 0  
dm nnn  
dmm c  
dmf 18500  
lb 0.10  
wtfile  
proc ft  
fn 65536  
werr  
wexp wft  
wbs  
wnt

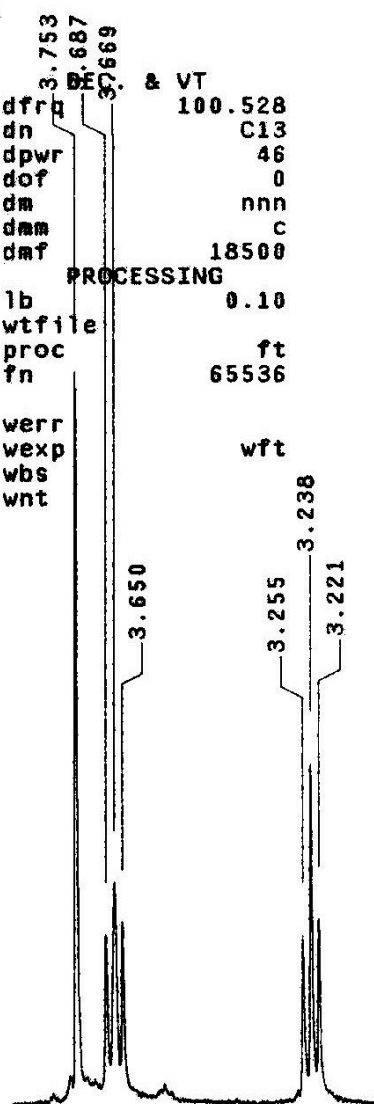

3.8 3.6 3.4 ppm  
31.30 34.64 34.07

7.240  
7.239

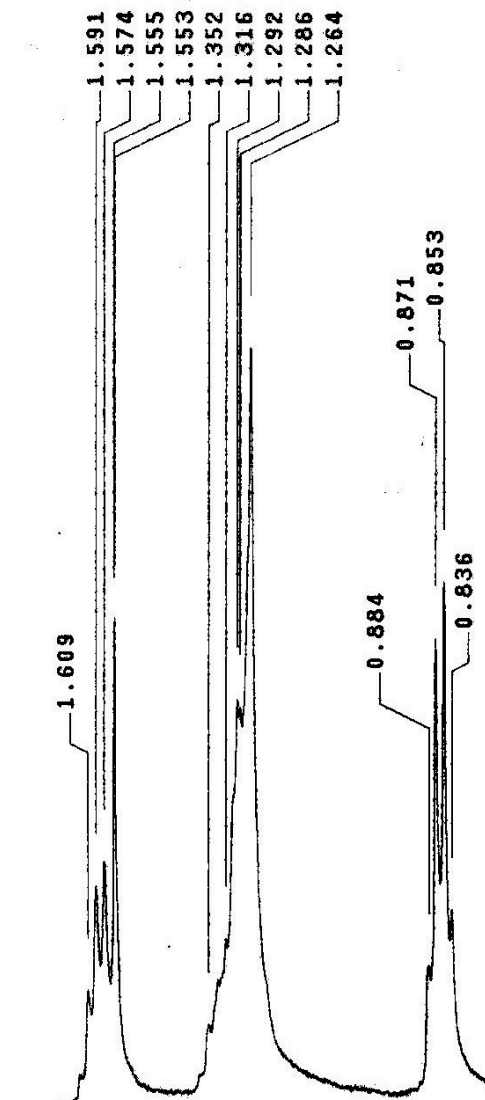

1.7 1.5 1.3 1.1 ppm  
22.40 52.06 25.54

3.753  
3.687  
3.669  
3.650  
3.255  
3.238  
3.221

1.609  
1.591  
1.574  
1.555  
1.553  
1.352  
1.316  
1.292  
1.286  
1.264  
0.884  
0.871  
0.853  
0.836

-0.023

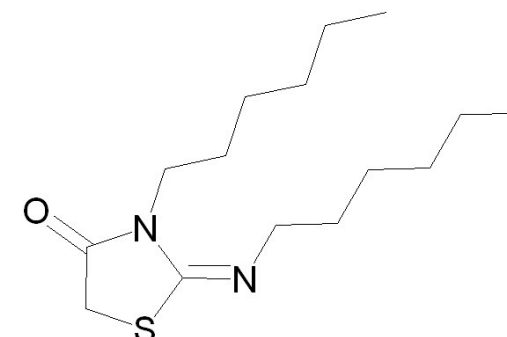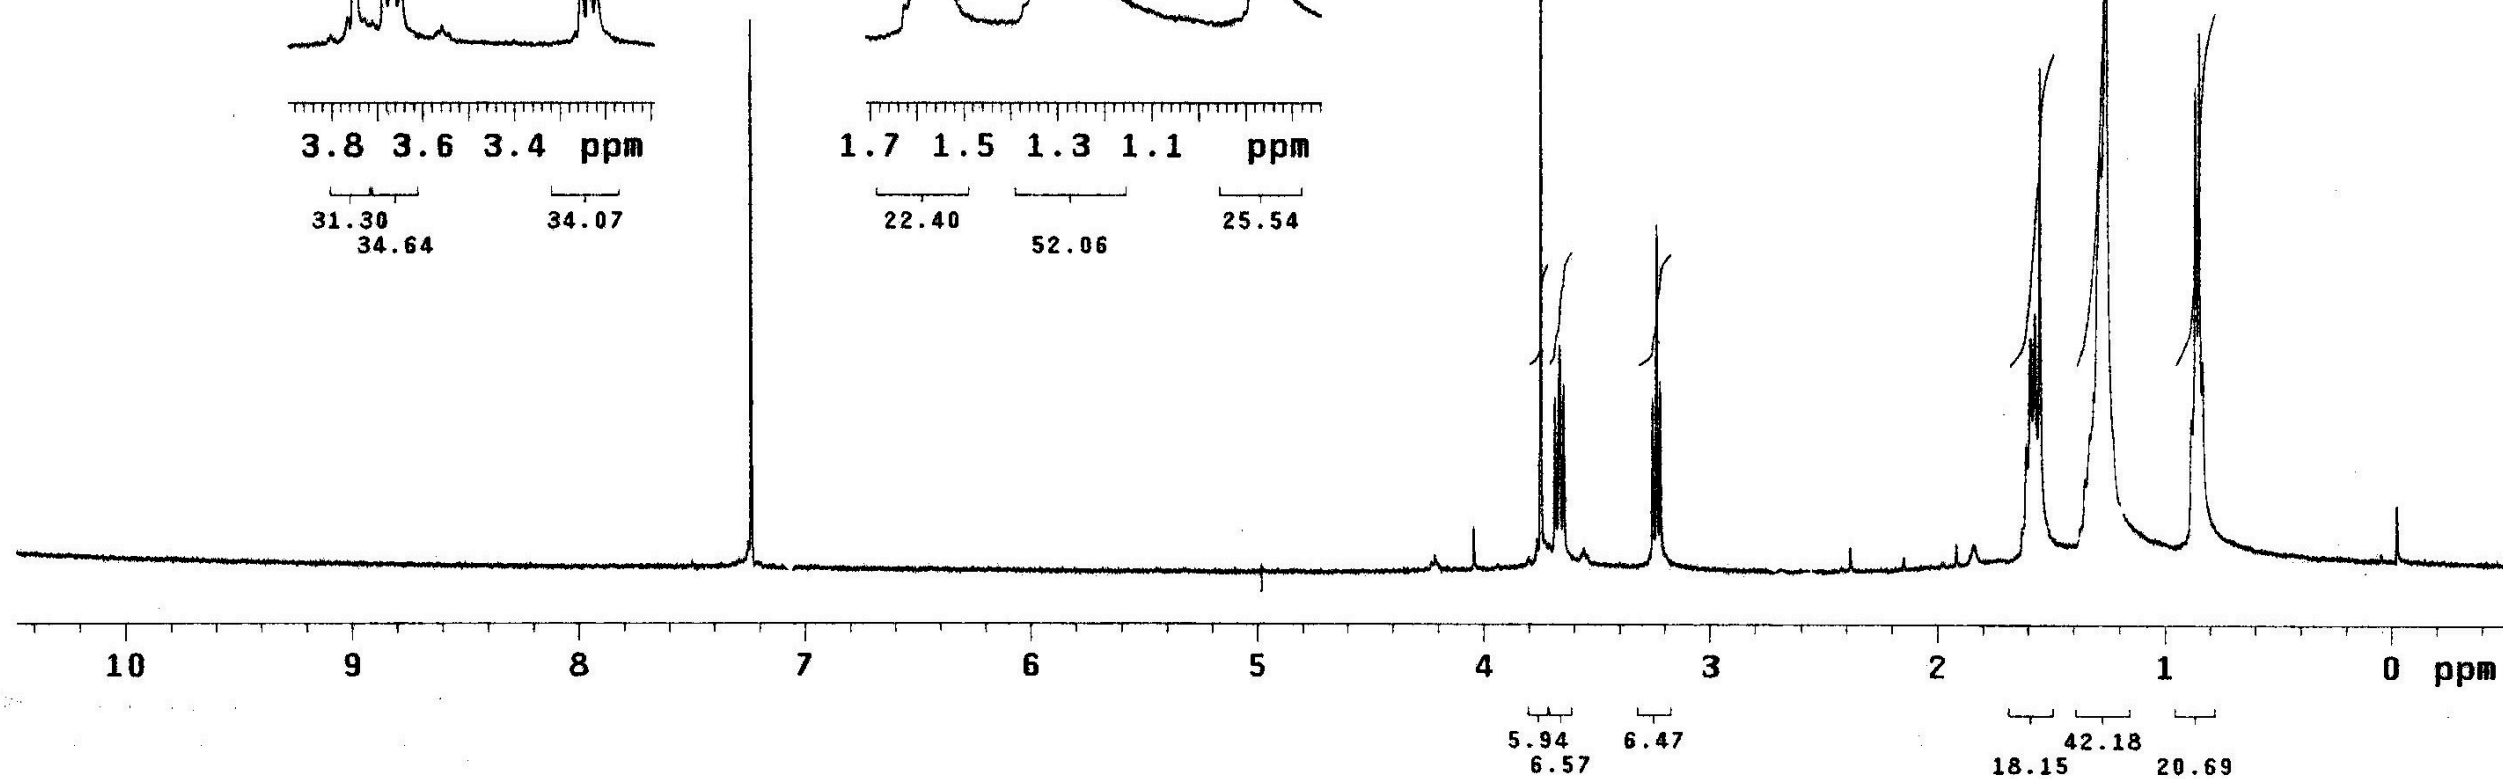

Std Carbon experiment

|             |            |            |          |  |  |
|-------------|------------|------------|----------|--|--|
| expl        | Carbon     |            |          |  |  |
| SAMPLE      |            |            |          |  |  |
| date        | Sep 1 2011 | temp       | not used |  |  |
| solvent     | CDC13      | gain       | 18       |  |  |
| file        | exp        | spin       | 20       |  |  |
| ACQUISITION |            |            |          |  |  |
| sw          | 24096.4    | pw90       | 15.900   |  |  |
| at          | 1.300      | alfa       | 10.000   |  |  |
| np          | 62674      | FLAGS      |          |  |  |
| fb          | 13200      | il         | n        |  |  |
| bs          | 5000       | in         | n        |  |  |
| d1          | 1.000      | dp         | y        |  |  |
| nt          | 10000      | hs         | nn       |  |  |
| ct          | 10000      | PROCESSING |          |  |  |
| tn          | C13        | lb         | 1.00     |  |  |
| sfrq        | 100.529    | fn         | 65536    |  |  |
| tof         | 1027.4     | sp         | -1534.5  |  |  |
| tpwr        | 56         | wp         | 24095.7  |  |  |
| pw          | 7.950      | rfl        | 9275.1   |  |  |
| DECOUPLER   |            |            |          |  |  |
| dn          | H1         | rfp        | 7739.9   |  |  |
| dof         | 0          | rp         | 53.5     |  |  |
| dm          | yyy        | lp         | -257.8   |  |  |
| dmm         | w          | PLOT       |          |  |  |
| dpwr        | 39         | wc         | 250      |  |  |
| dmt         | 9500       | sc         | 0        |  |  |
|             |            | vs         | 36       |  |  |
|             |            | th         | 2        |  |  |
|             |            | ai         | cdc ph   |  |  |

171.197

150.713

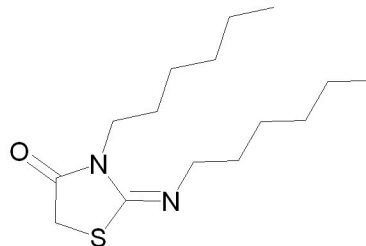

77.315

77.000

76.678

51.878

42.550

32.184

31.343

31.138

30.296

26.748

26.141

22.359

22.235

18.748

13.712

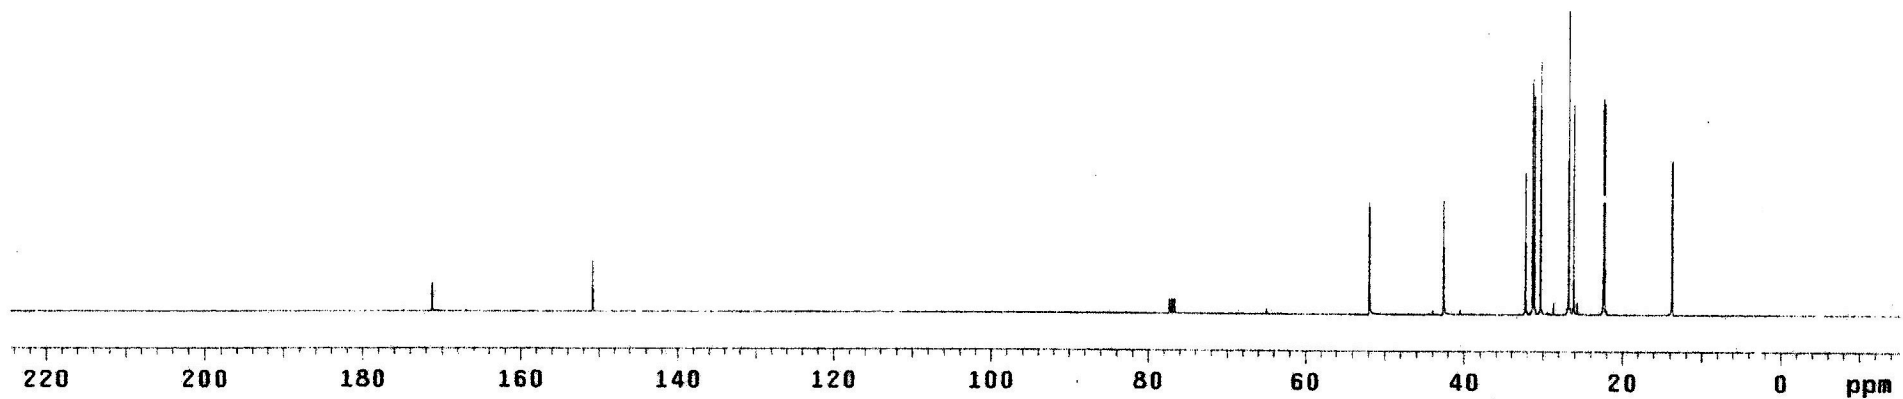

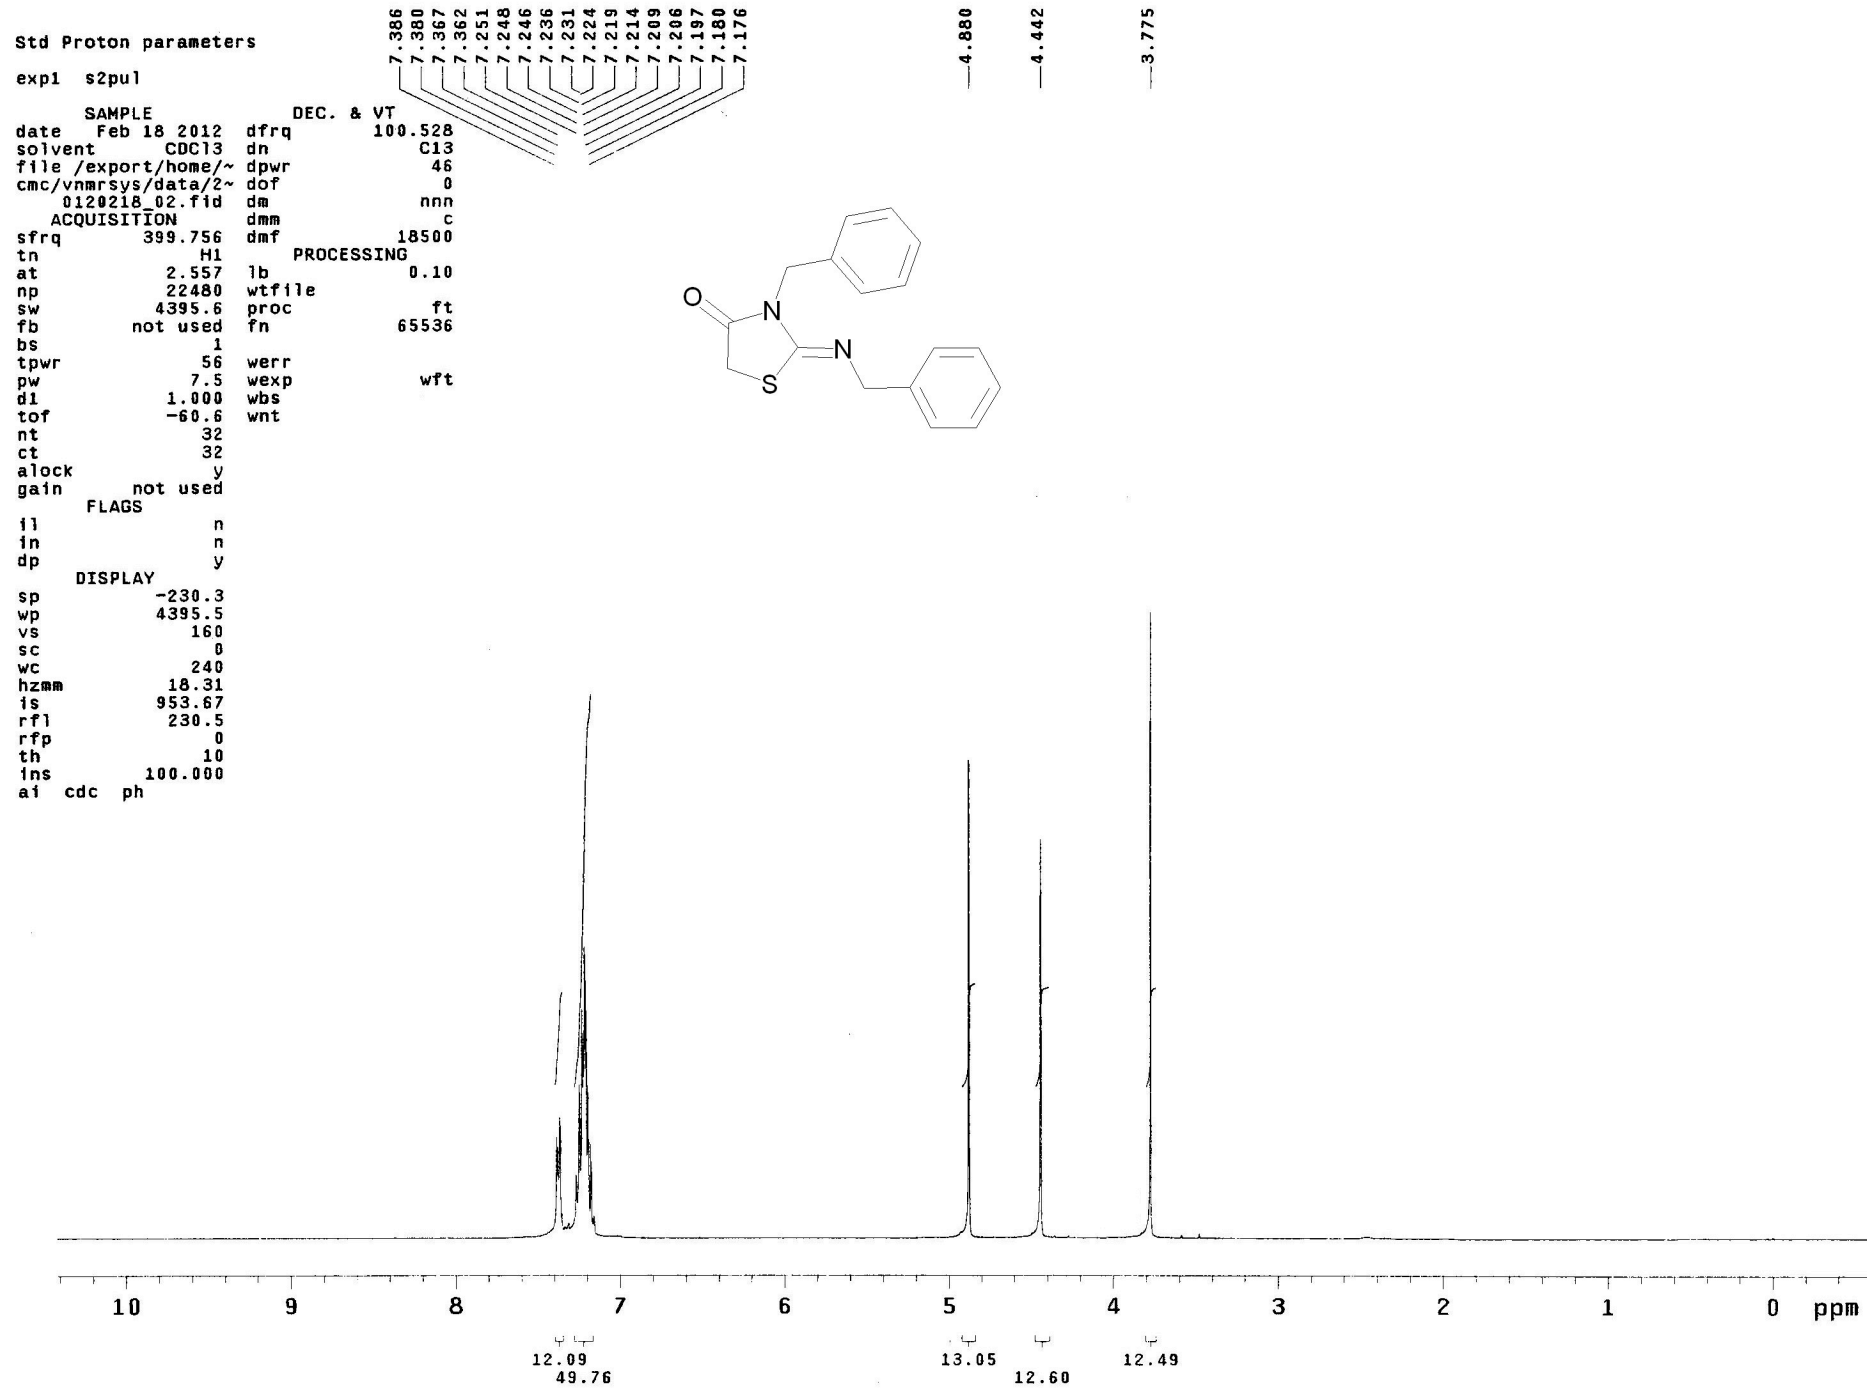

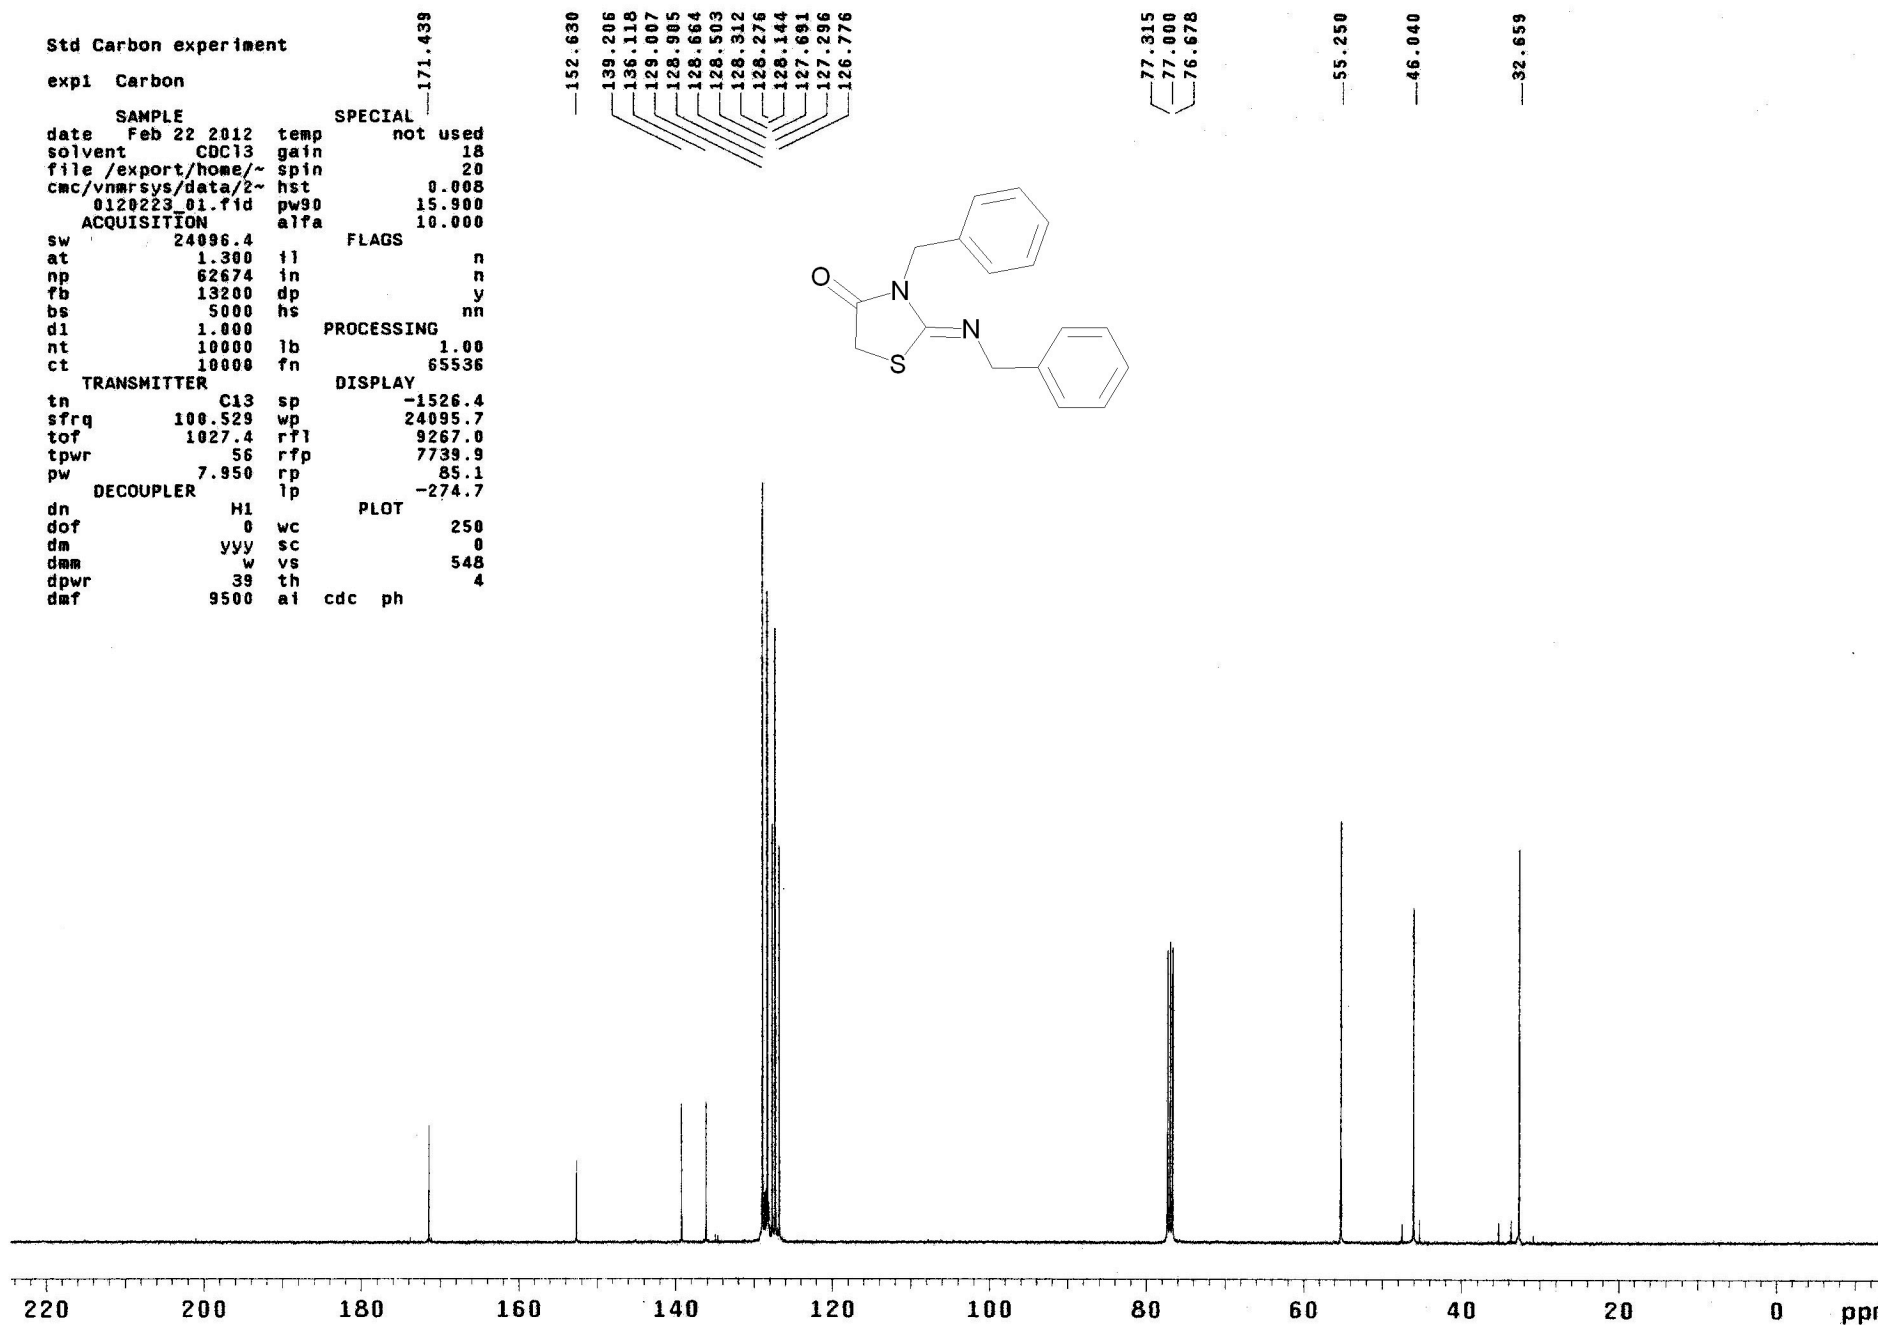

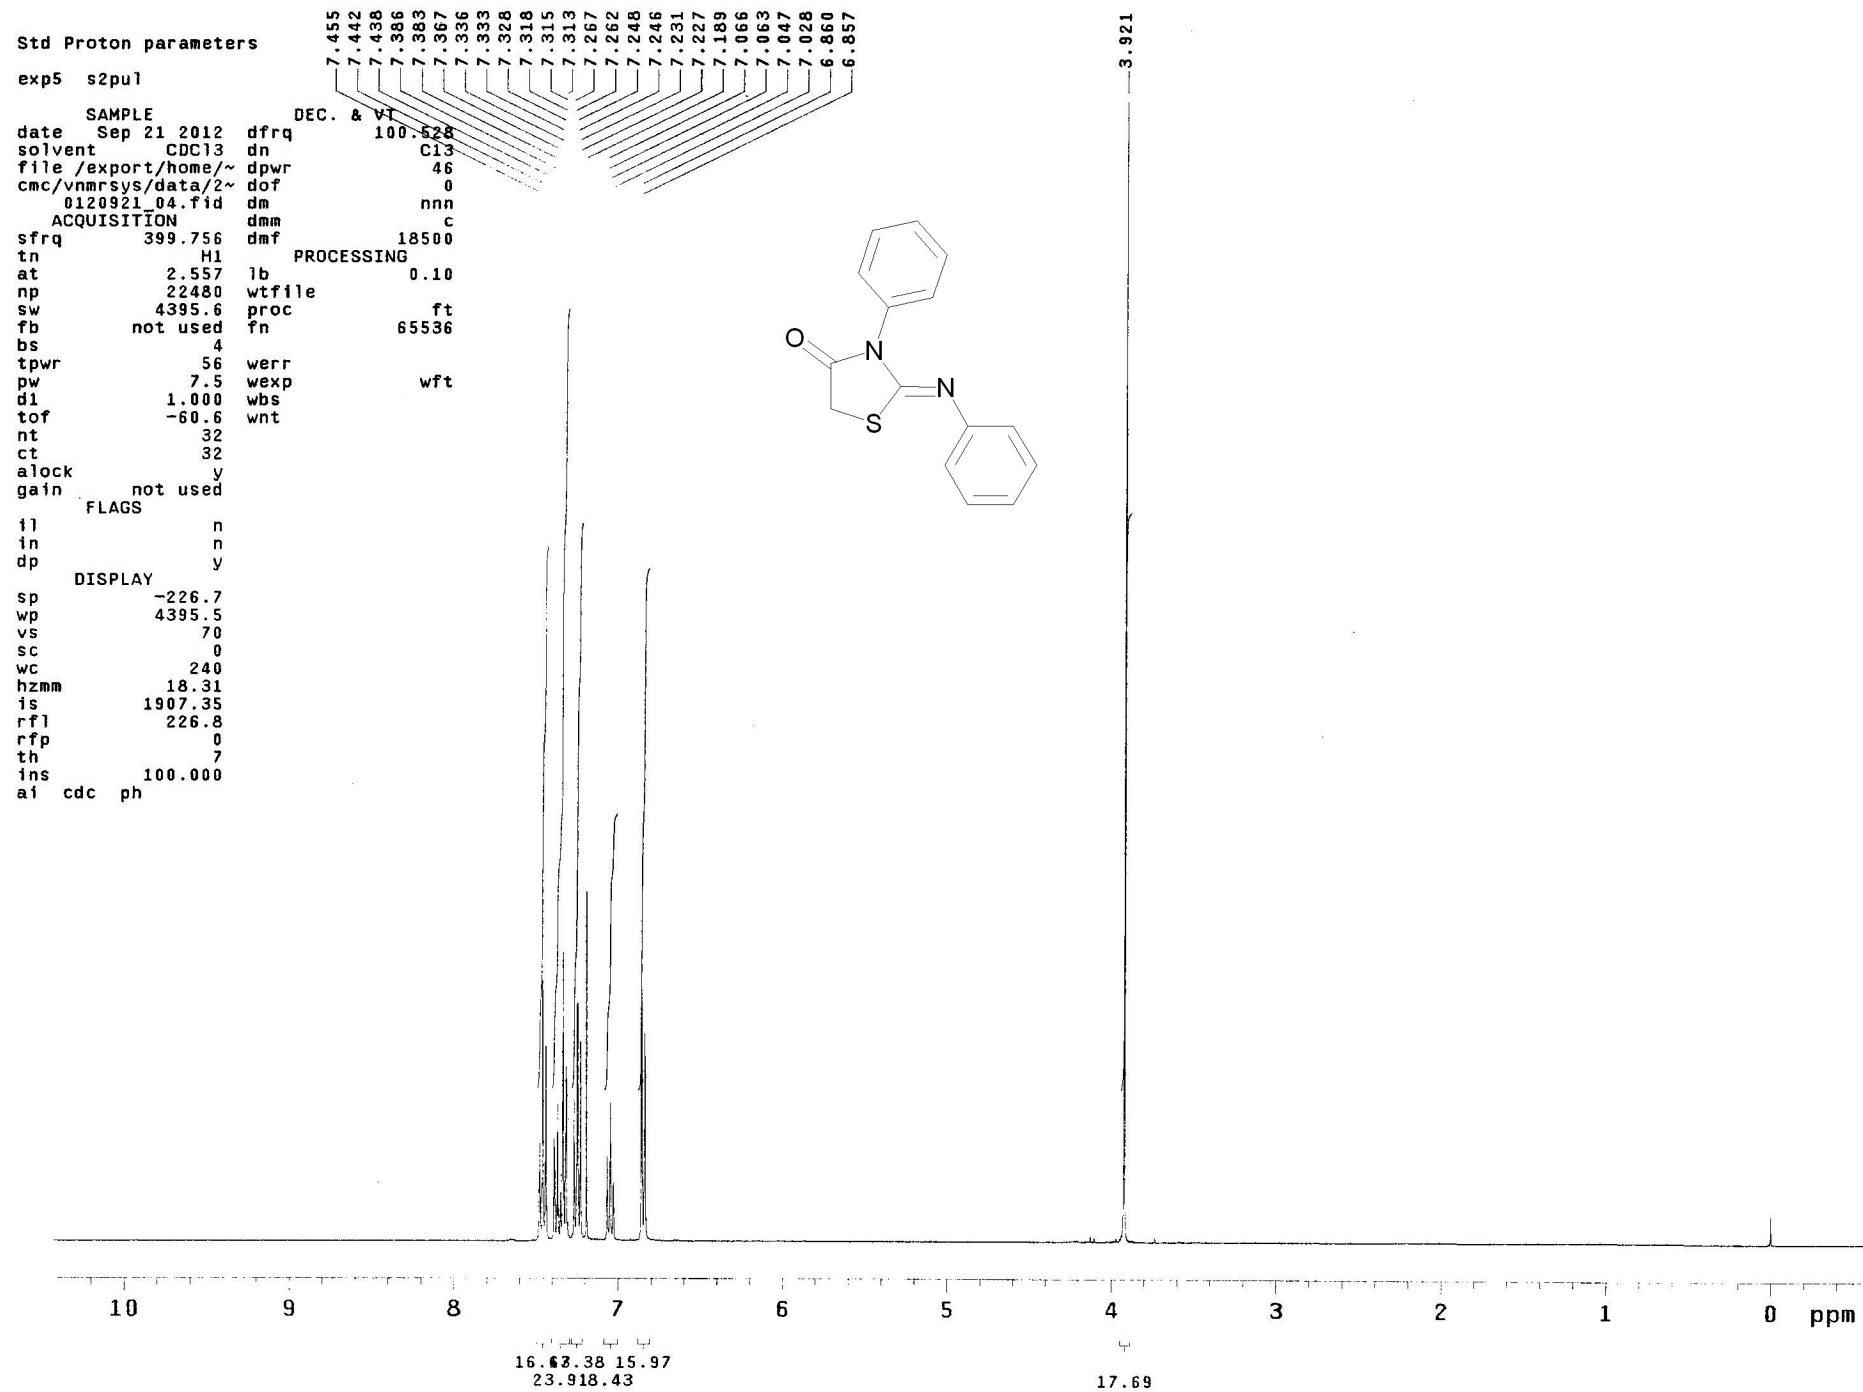

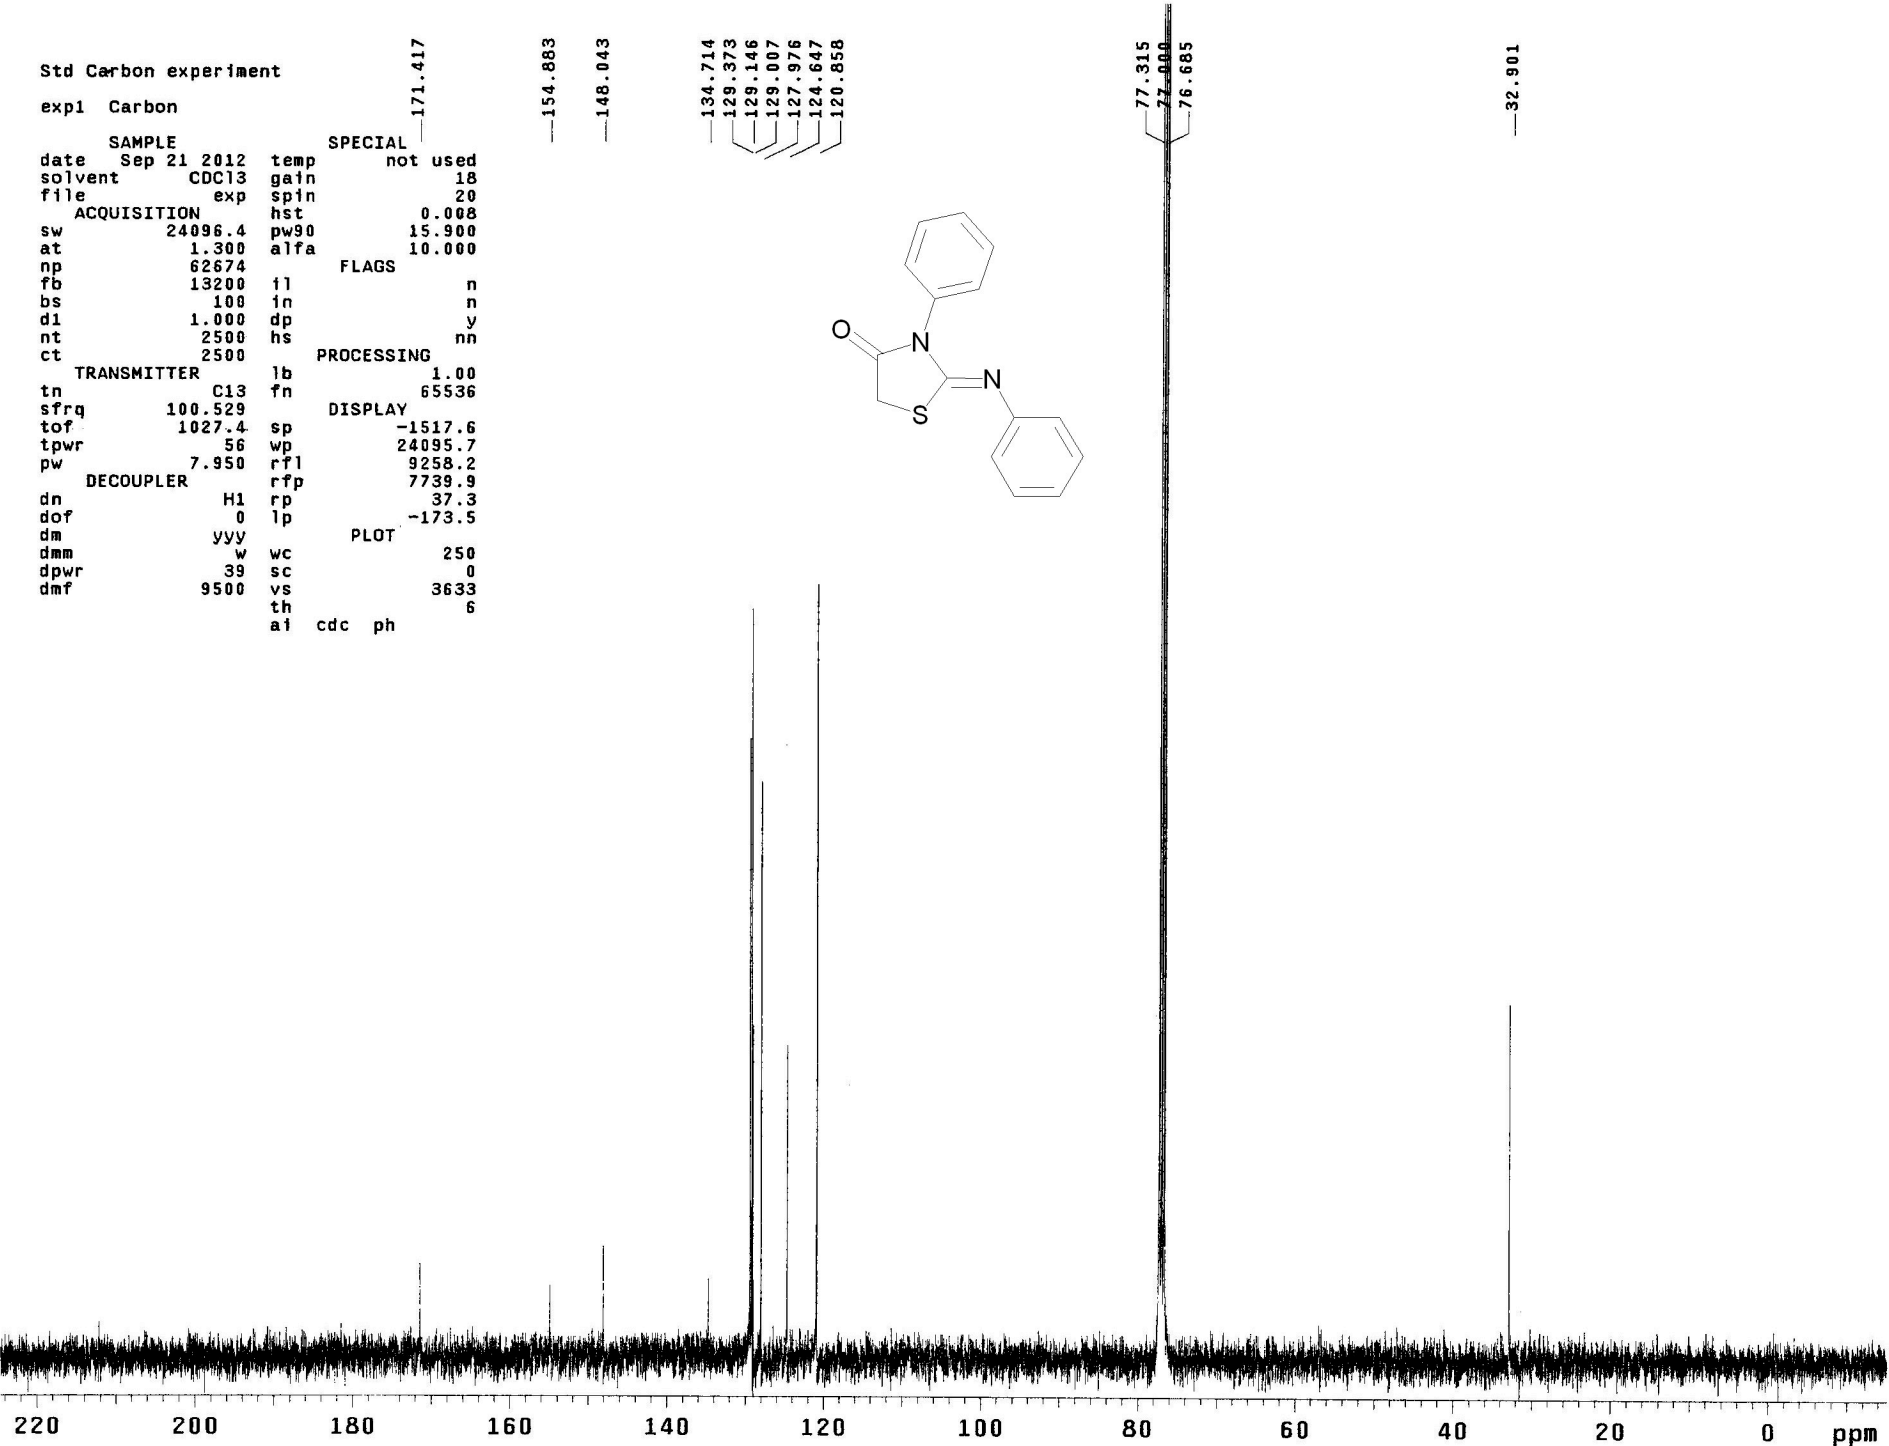

# Std Proton parameters

exp1 s2pu1

```

SAMPLE          DEC. & VT
date Sep 20 2012 dfrq      100.528
solvent CDC13      dn      C13
file /export/home/~ dpwr      46
cmc/vnmrsys/data/2~ dof      0
0120920_10.fid dm      nnn
ACQUISITION      dmm      c
sfrq      399.756 dmf      18500
tn      H1      PROCESSING
at      2.557 lb      0.10
np      22480 wtfile
sw      4395.6 proc      ft
fb      not used fn      65536
bs      1
tpwr      56 werr
pw      7.5 wexp      wft
d1      1.000 wbs
tof      -60.6 wnt
nt      32
ct      32
alock      y
gain      not used
FLAGS
il      n
in      n
dp      y
DISPLAY
sp      -229.0
wp      4395.5
vs      64
sc      0
wc      240
hzmm      18.31
is      962.46
rfl      229.1
rfp      0
th      10
ins      100.000
ai cdc ph

```

7.256  
7.235  
7.197  
7.185  
7.183  
7.176  
7.048  
7.027  
6.744  
6.724

3.888  
3.886

2.317  
2.243

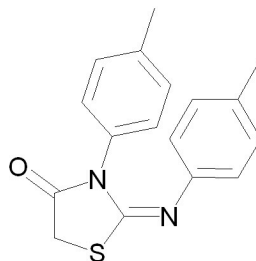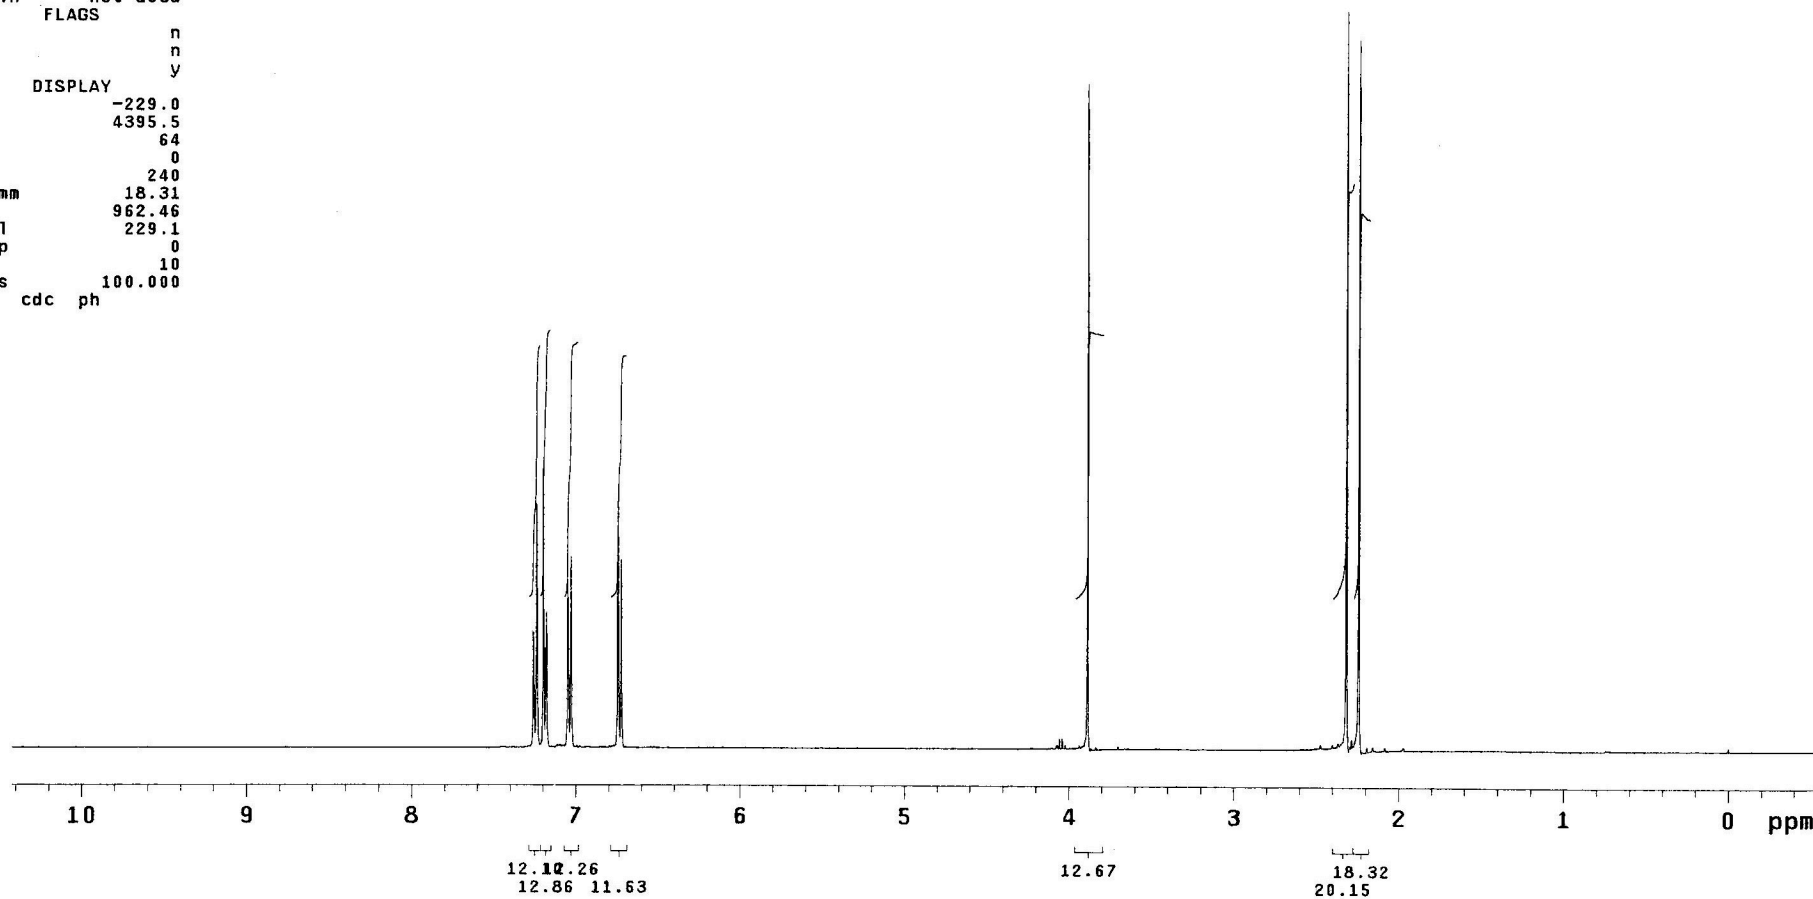

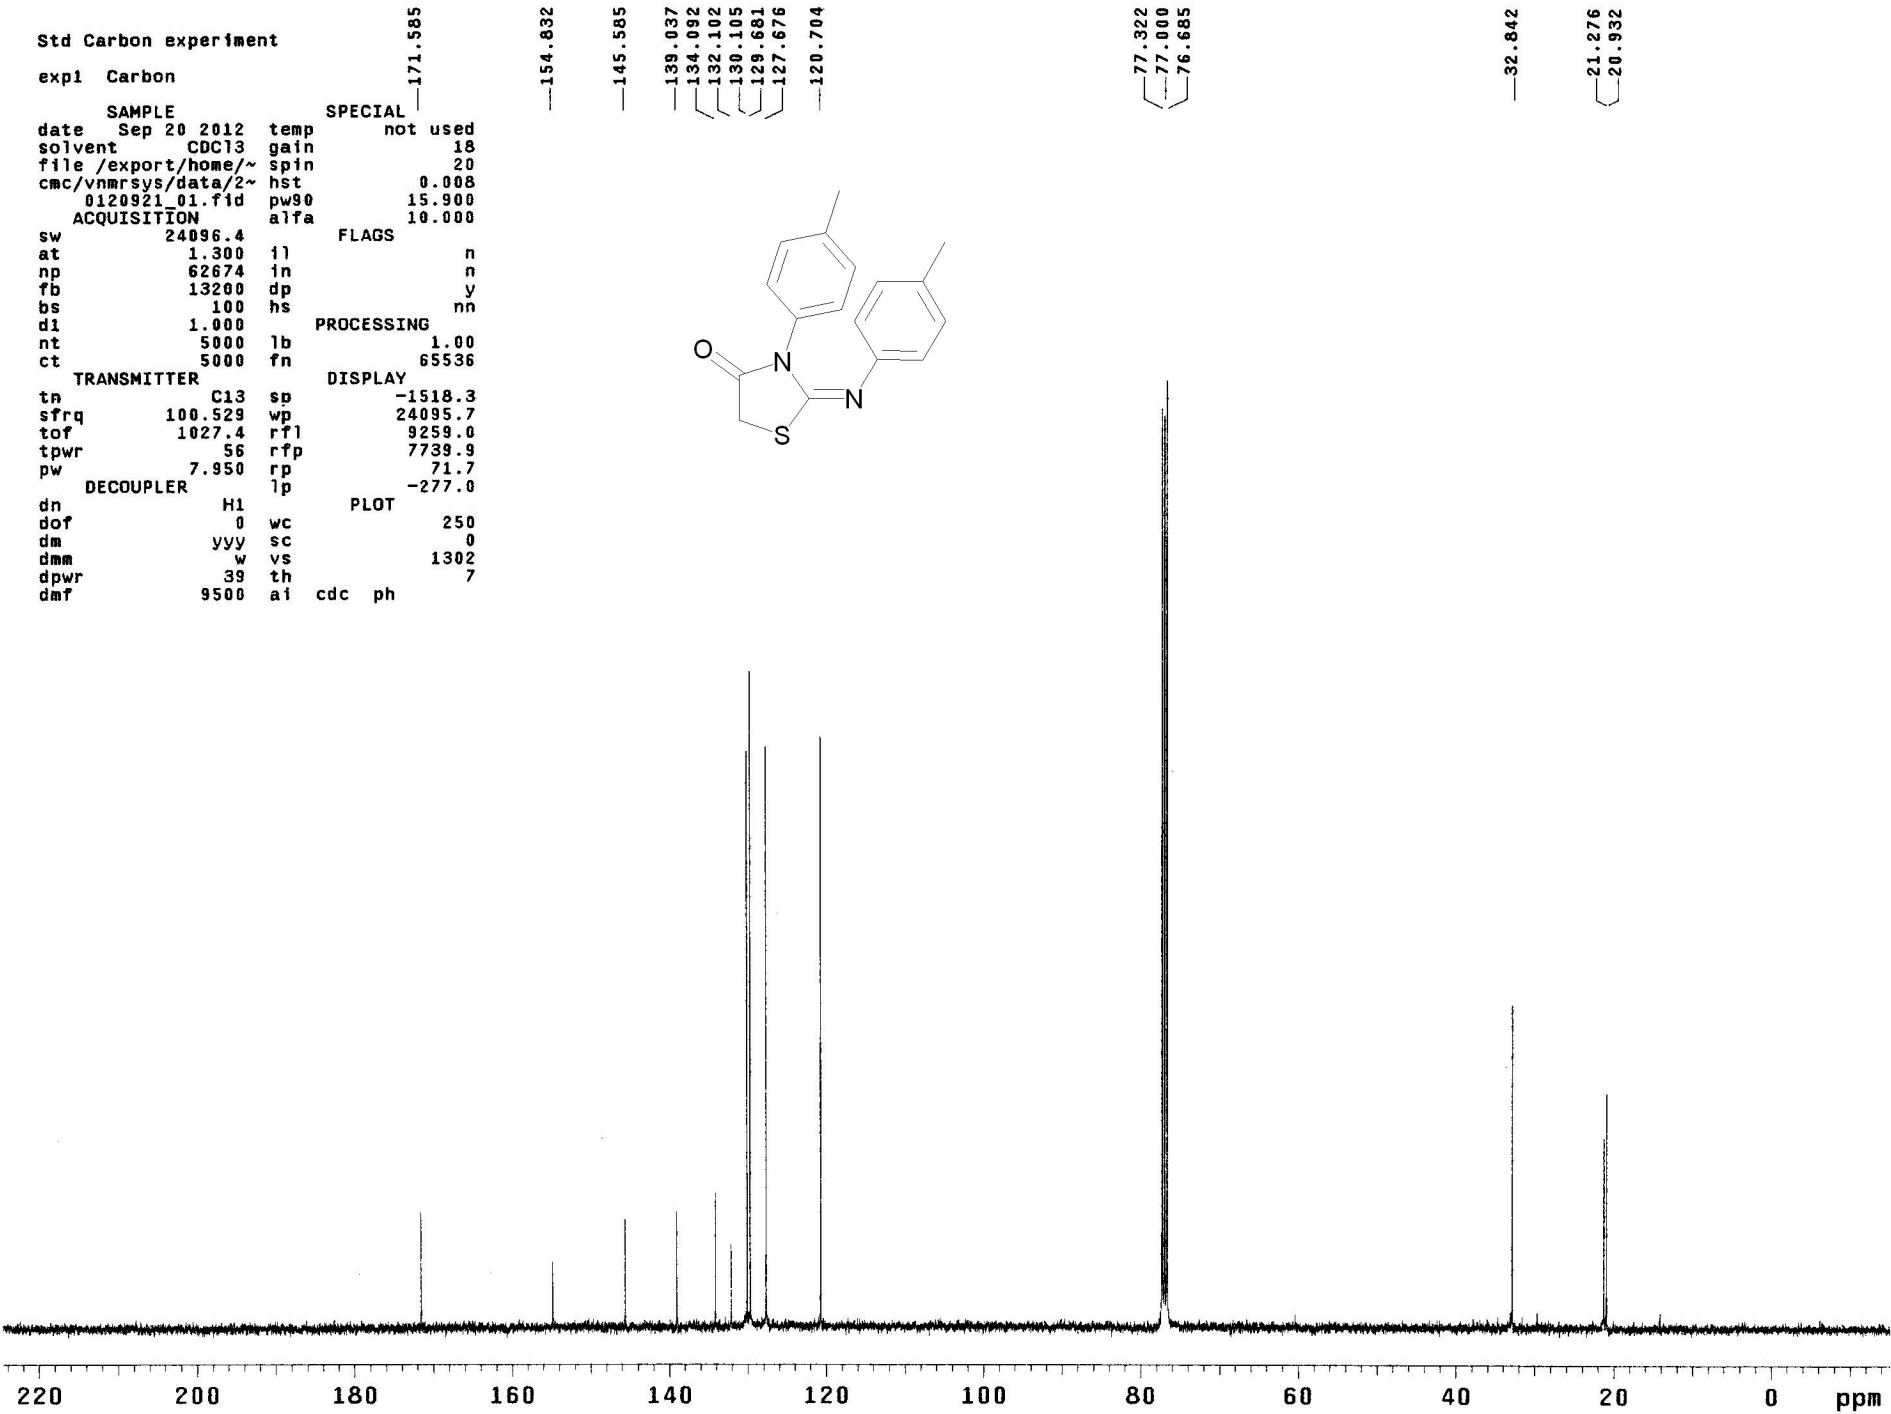

# Std Proton parameters

exp5 s2pul

| SAMPLE         |                | DEC. & VT  |         |
|----------------|----------------|------------|---------|
| date           | Sep 21 2012    | dfrq       | 100.528 |
| solvent        | CDCl3          | dn         | C13     |
| file           | /export/home/~ | dpwr       | 46      |
| cmr/vnmr       | sys/data/2~    | dof        | 0       |
| 0120921_08.fid |                | dm         | nnn     |
| ACQUISITION    |                | dmm        | c       |
| sfrq           | 399.756        | dmf        | 18500   |
| tn             | H1             | PROCESSING |         |
| at             | 2.557          | lb         | 0.10    |
| np             | 22480          | wtfile     |         |
| sw             | 4395.6         | proc       | ft      |
| fb             | not used       | fn         | 65536   |
| bs             | 4              | werr       |         |
| tpwr           | 56             | wexp       | wft     |
| pw             | 7.5            | wbs        |         |
| d1             | 1.000          | wnt        |         |
| tof            | -60.6          |            |         |
| nt             | 32             |            |         |
| ct             | 32             |            |         |
| alock          | y              |            |         |
| gain           | not used       |            |         |
| FLAGS          |                |            |         |
| il             | n              |            |         |
| in             | n              |            |         |
| dp             | y              |            |         |
| DISPLAY        |                |            |         |
| sp             | -227.9         |            |         |
| wp             | 4395.5         |            |         |
| vs             | 120            |            |         |
| sc             | 0              |            |         |
| wc             | 240            |            |         |
| hzmm           | 18.31          |            |         |
| is             | 1907.35        |            |         |
| rfl            | 228.0          |            |         |
| rfp            | 0              |            |         |
| th             | 11             |            |         |
| ins            | 100.000        |            |         |
| ai             | cdc ph         |            |         |

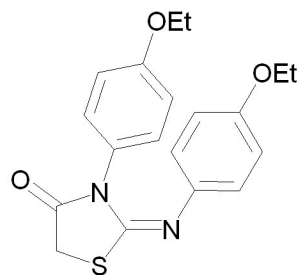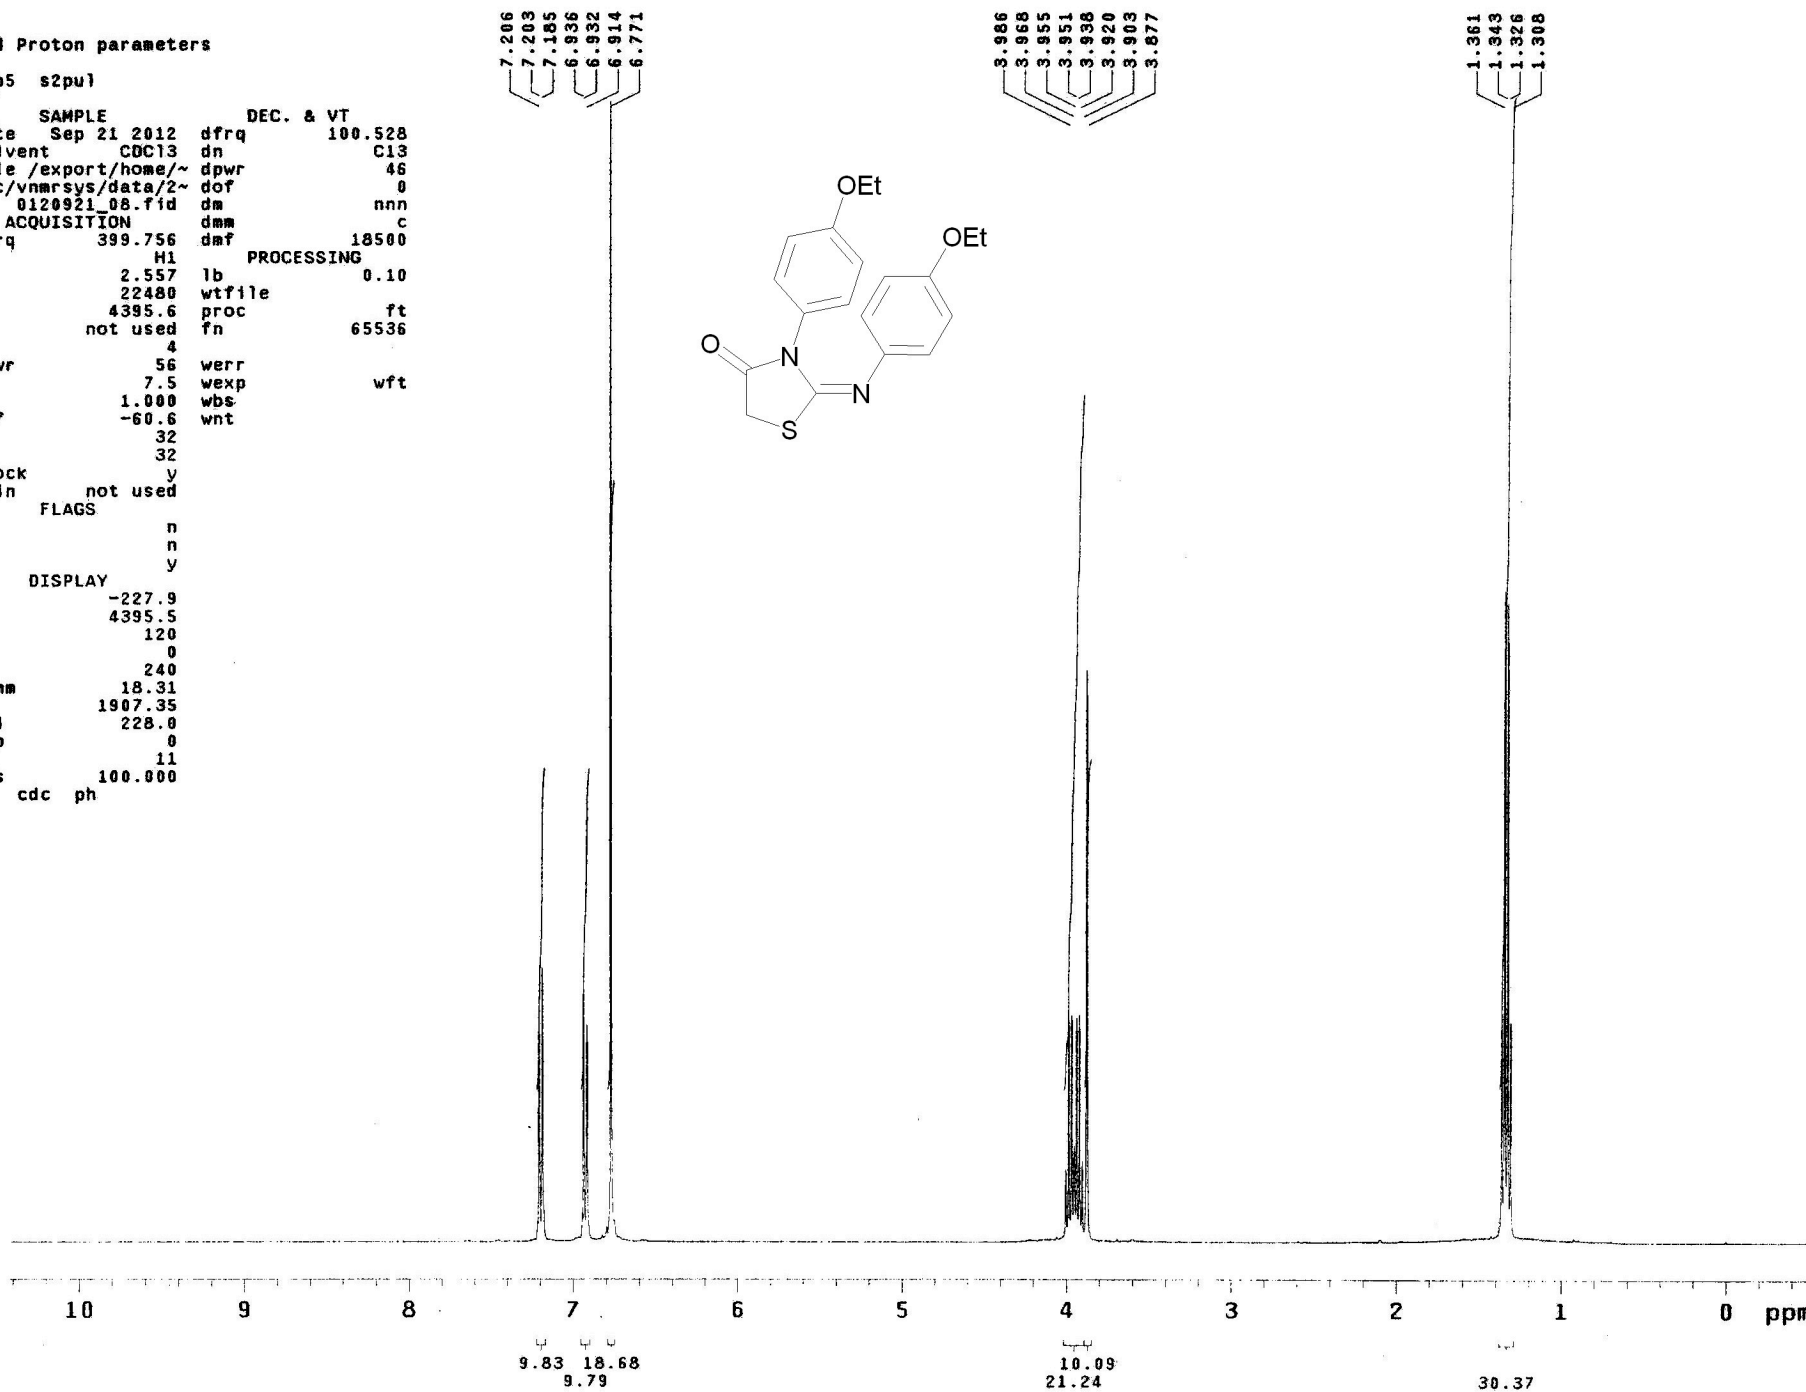

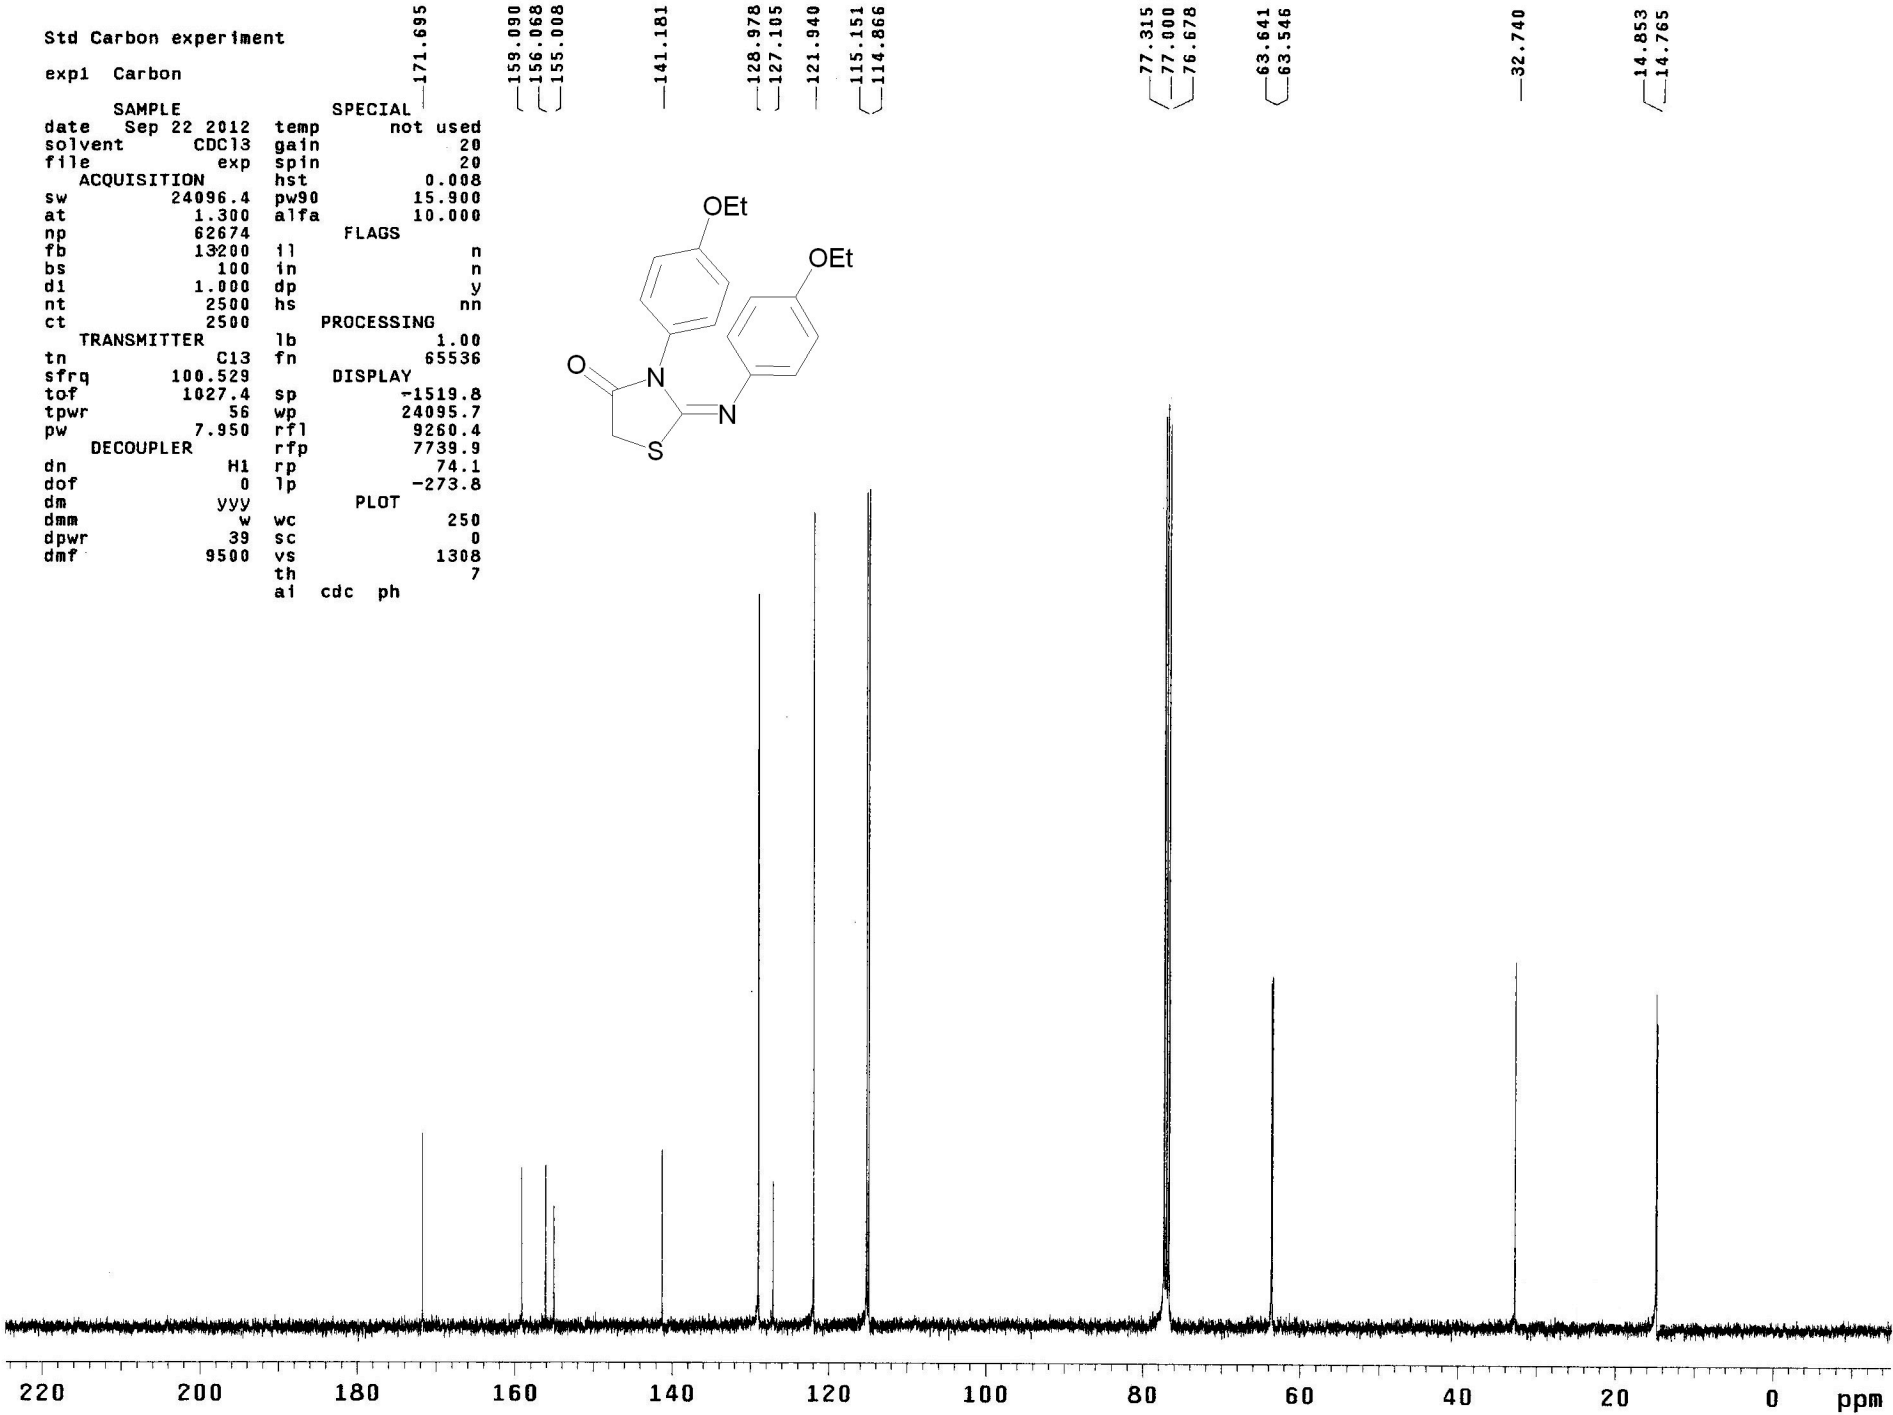

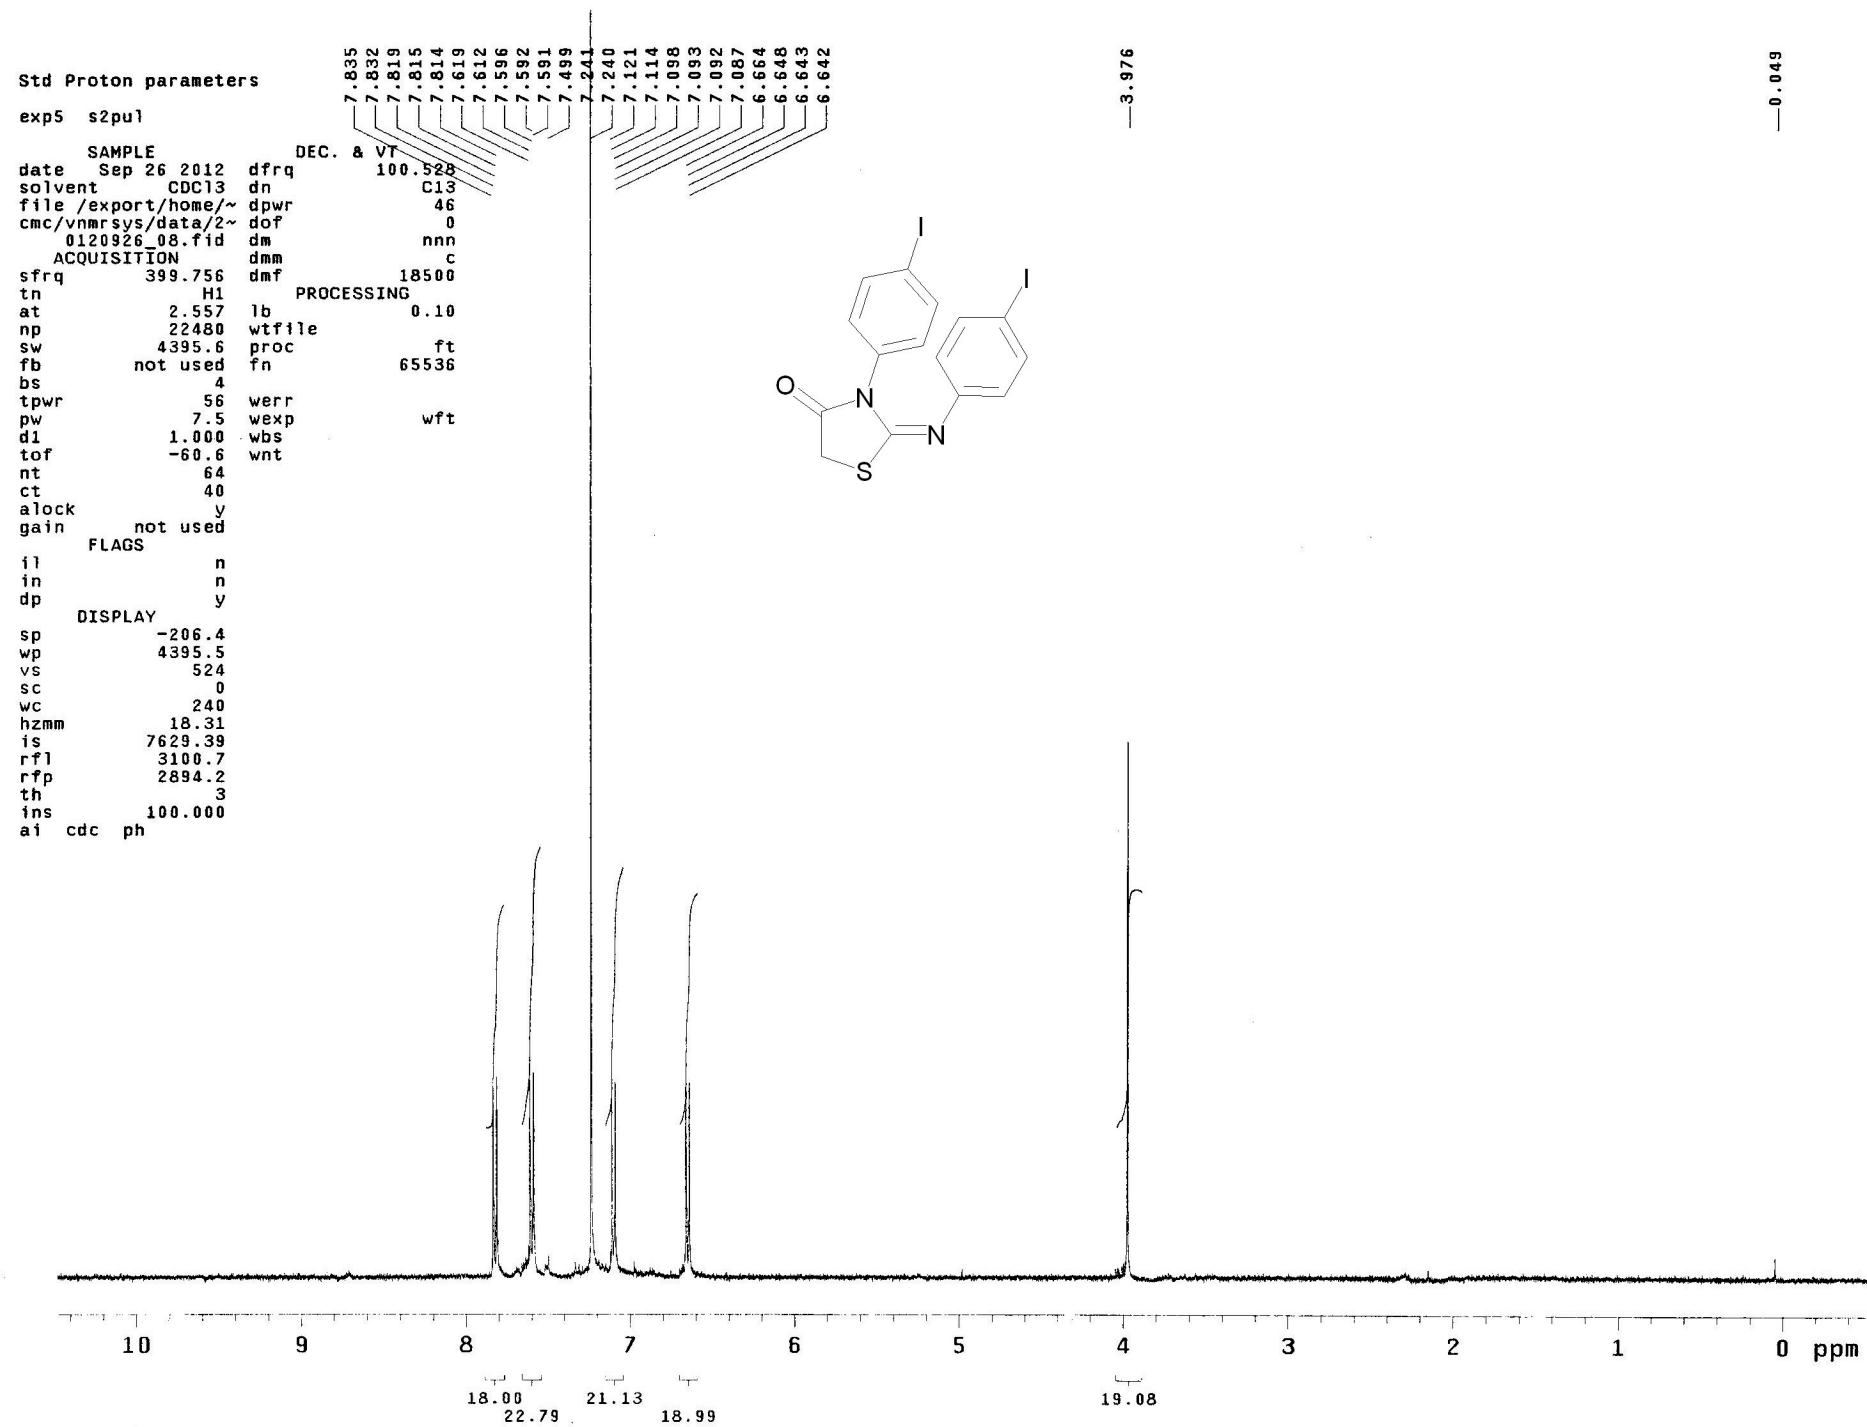

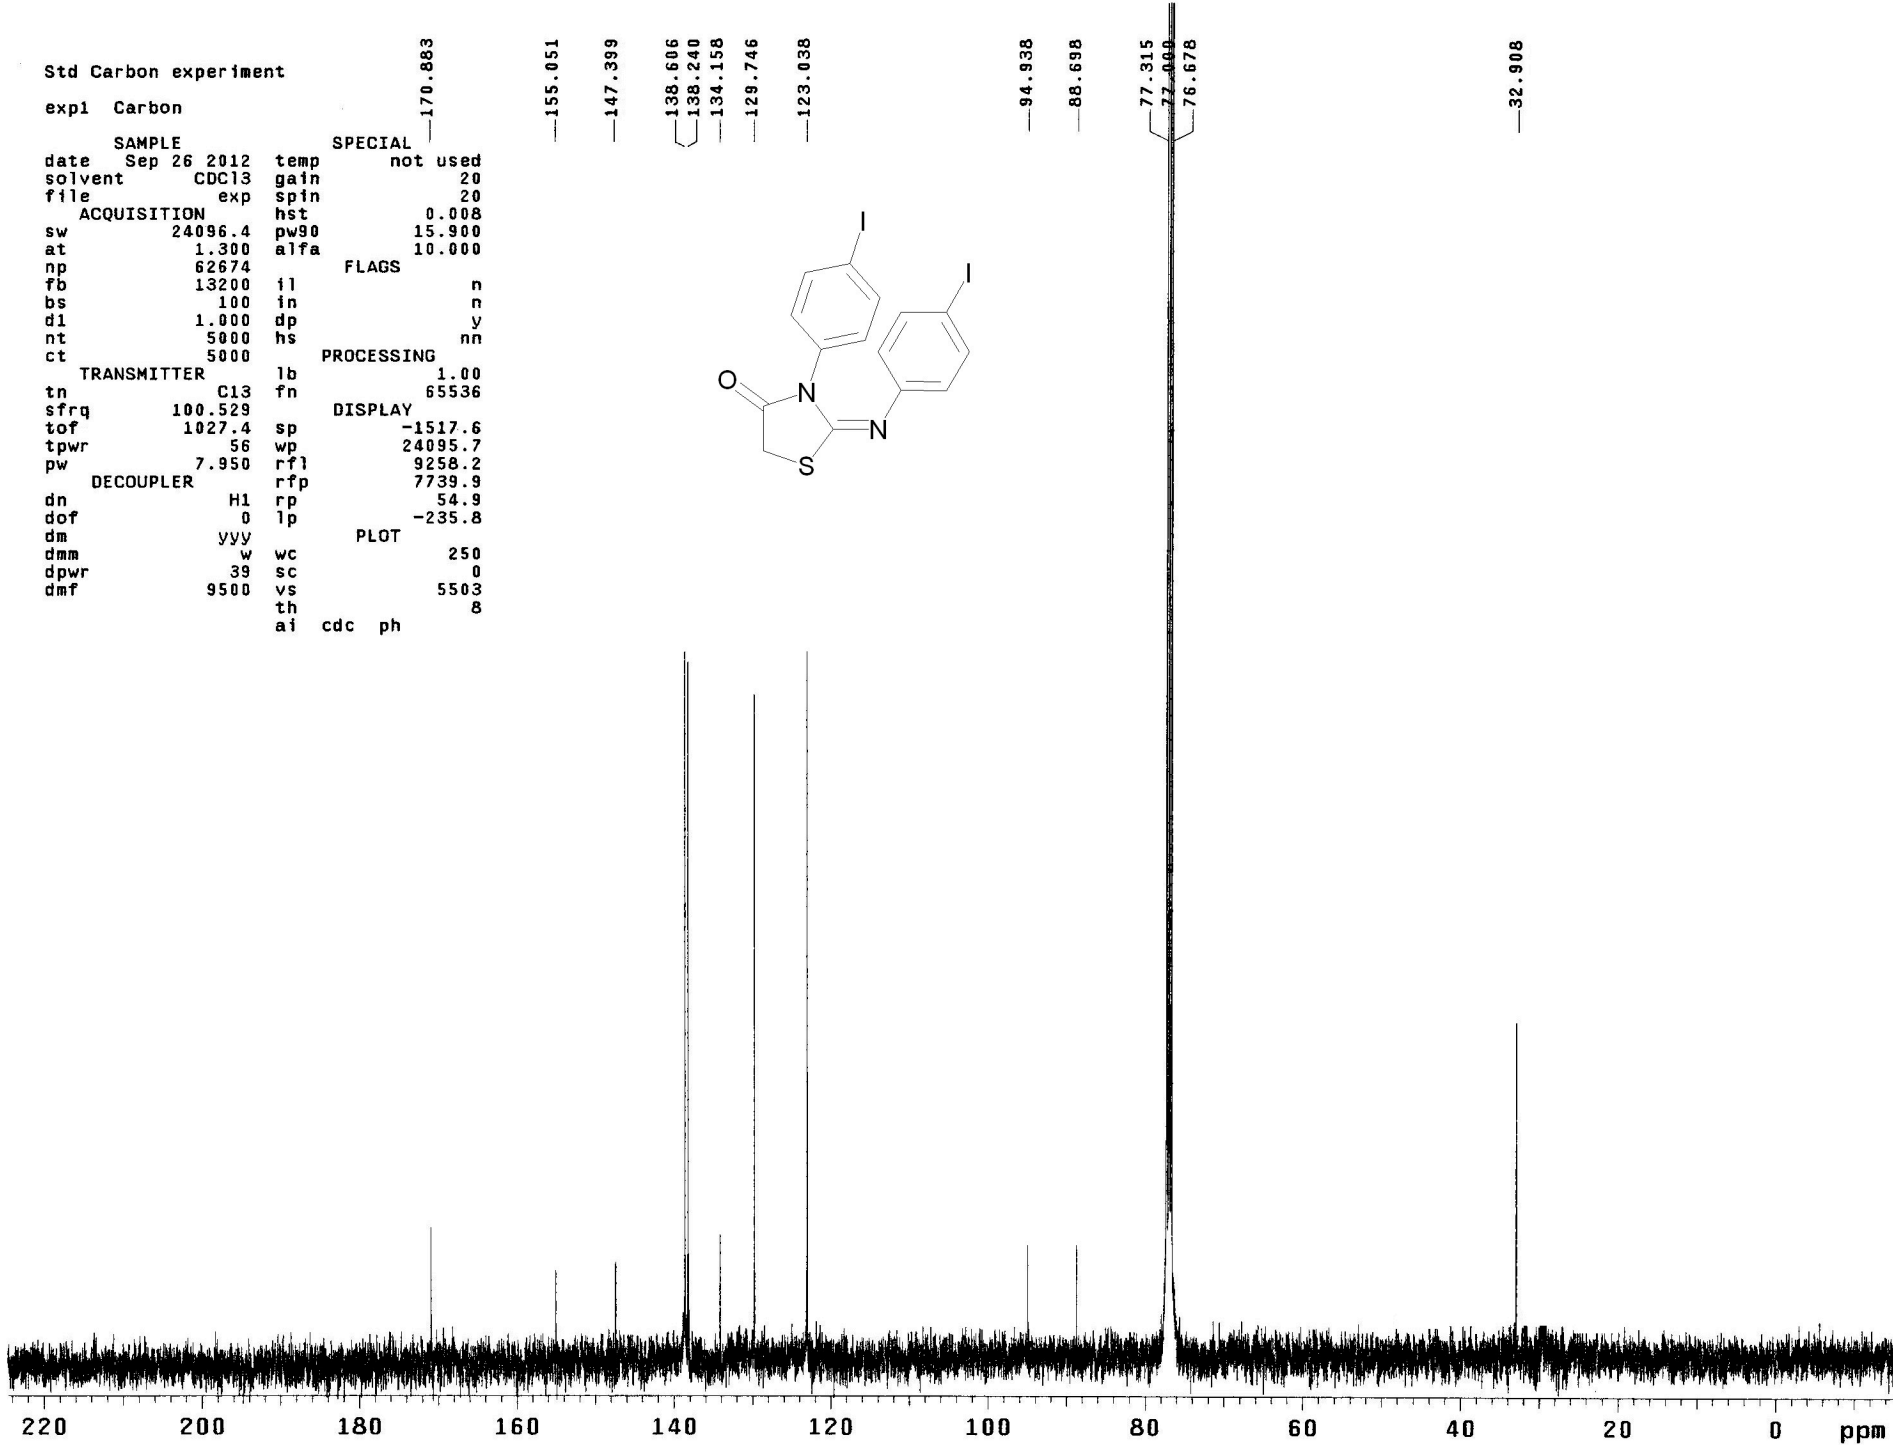

Supplement: c3ra46270f.pdf [file c3ra46270f.pdf]
